# Supplementary material for: Project “Biodiversity MARE Tricase”: A Species Inventory of the Coastal Area of Southeastern Salento (Ionian Sea, Italy)
Source: MDPI journal article supplement (doi:10.3390/d14110904), 2022-10-26
Supplement: s1 [file Table S1. Complete species list 22.10.2022.xlsx]

## Sheet: Marine organisms
Kingdom	Phylum	Class	Order	Family	Species/Taxa	Authority	Depth	Phenology	New Record	Non-indigenous Species	Specimens collects (abundance in the area)	Reference
Animalia	Annelida	Clitellata	Rhynchobdellida	Piscicolidae	Branchellion torpedinis	Savigny, 1822	-	-	Ionian Sea		1
Animalia	Annelida	Clitellata	Rhynchobdellida	Piscicolidae	Pontobdella muricata	(Linnaeus, 1758)	-	-			1
Animalia	Annelida	Polychaeta	Amphinomida	Amphinomidae	Hermodice carunculata	(Pallas, 1766)	5-25 m	Eggs (VIII)			(common)
Animalia	Annelida	Polychaeta	Echiuroidea	Bonelliidae	Bonellia viridis	Rolando, 1822	5-15 m	-			(common)
Animalia	Annelida	Polychaeta	Eunicida	Dorvilleidae	Dorvillea rubrovittata	(Grube, 1855)	35 m	-			2
Animalia	Annelida	Polychaeta	Eunicida	Eunicidae	Leodice harassii	(Audouin & Milne Edwards, 1833)	70 m	-			2
Animalia	Annelida	Polychaeta	Eunicida	Eunicidae	Lysidice collaris	Grube, 1870	70 m	-		TRUE	1
Animalia	Annelida	Polychaeta	Eunicida	Eunicidae	Lysidice ninetta	Audouin & H Milne Edwards, 1833	15 m	-			2
Animalia	Annelida	Polychaeta	Phyllodocida	Hesionidae	Psamathe fusca	Johnston, 1836	70 m	-			1
Animalia	Annelida	Polychaeta	Phyllodocida	Nereididae	Ceratonereis (Composetia) costae	(Grube, 1840)	20 m	-			1
Animalia	Annelida	Polychaeta	Phyllodocida	Phyllodocidae	Alciopini ind	Ehlers, 1864	5 m	Occurrence (IV)			1 (rare)
Animalia	Annelida	Polychaeta	Phyllodocida	Polynoidae	Harmothoe cf. impar	(Johnston, 1839)	35 m	-			1
Animalia	Annelida	Polychaeta	Phyllodocida	Polynoidae	Harmothoe pagenstecheri	Michaelsen, 1896	25 m	-	Ionian Sea		1
Animalia	Annelida	Polychaeta	Phyllodocida	Polynoidae	Lepidonotus clava	(Montagu, 1808)	70 m	-			1
Animalia	Annelida	Polychaeta	Phyllodocida	Sigalionidae	Sigalion mathildae	Audouin & Milne Edwards in Cuvier, 1830	7 m	-			2
Animalia	Annelida	Polychaeta	Phyllodocida	Syllidae	Paraehlersia ferrugina	(Langerhans, 1881)	20 m	-			2
Animalia	Annelida	Polychaeta	Phyllodocida	Syllidae	Pseudosyllis brevipennis	Grube, 1863	70 m	-			1
Animalia	Annelida	Polychaeta	Sabellida	Sabellidae	Sabella spallanzanii	(Gmelin, 1791)	3-20 m	-			(common)
Animalia	Annelida	Polychaeta	Sabellida	Serpulidae	Hydroides elegans	(Haswell, 1883) [nomen protectum]	60 m	-		TRUE	(common)
Animalia	Annelida	Polychaeta	Sabellida	Serpulidae	Hydroides pseudouncinata	Zibrowius, 1968	70 m	-			1
Animalia	Annelida	Polychaeta	Sabellida	Serpulidae	Protula ind	Risso, 1826	10-70 m	-			(common)
Animalia	Annelida	Polychaeta	Sabellida	Serpulidae	Spirobranchus triqueter	(Linnaeus, 1758)	60 m	-			(common)
Animalia	Annelida	Polychaeta	Sabellida	Serpulidae	Spirorbis ind	Daudin, 1800	10 m	-			(common)
Animalia	Annelida	Polychaeta	Sabellida	Serpulidae	Vermiliopsis infundibulum	(Philippi, 1844)	50-70 m	Eggs (VII)			2
Animalia	Annelida	Polychaeta	Sabellida	Serpulidae	Vermiliopsis labiata	(O. G. Costa, 1861)	20 m	-			1
Animalia	Annelida	Polychaeta	Sabellida	Serpulidae	Vermiliopsis striaticeps	(Grube, 1862)	18 m	-			1
Animalia	Annelida	Polychaeta	Terebellida	Cirratulidae	Cirriformia tentaculata	(Montagu, 1808)	18 m	-			1
Animalia	Annelida	Polychaeta	Terebellida	Cirratulidae	Dodecaceria concharum	Örsted, 1843	70 m	-			1
Animalia	Annelida	Polychaeta	Terebellida	Terebellidae	Streblosoma ind	M. Sars in G.O. Sars, 1872	35 m	-			1
Animalia	Annelida	Polychaeta		Opheliidae	Armandia polyophthalma	Kükenthal, 1887	7 m	-			1
Animalia	Annelida	Polychaeta		Orbiniidae	Phylo foetida	(Claparède, 1868)	18 m	-			1
Animalia	Annelida		Myzostomida	Myzostomatidae	Myzostoma glabrum	Graff, 1877	60 m	-	Ionian Sea		1
Animalia	Annelida		Sipuncula	Phascolosomatidae	Phascolosoma (Phascolosoma) granulatum	Leuckart, 1828	0-1 m	-			(common)
Animalia	Arthropoda	Collembola		Neanuridae	Anurida maritima	(Guérin-Méneville, 1836)	0 m	-			(common)
Animalia	Arthropoda	Hexanauplia	Lepadiformes	Lepadidae	Lepas (Anatifa) pectinata	Spengler, 1793	0 m	-			(common)
Animalia	Arthropoda	Hexanauplia	Siphonostomatoida	Pennellidae	Pennella ind	Oken, 1815	-	-			2
Animalia	Arthropoda	Hexanauplia		Sacculinidae	Sacculina ind	Thompson, 1836	1 m	-			(common)
Animalia	Arthropoda	Malacostraca	Amphipoda	Caprellidae	Caprella ind	Lamarck, 1801	3-5 m	-			(common)
Animalia	Arthropoda	Malacostraca	Amphipoda	Caprellidae	Phtisica marina	Slabber, 1769	5 m	-			1
Animalia	Arthropoda	Malacostraca	Amphipoda	Caprellidae	Pseudoprotella phasma	(Montagu, 1804)	5 m	-			1
Animalia	Arthropoda	Malacostraca	Amphipoda	Ischyroceridae	Jassa marmorata	Holmes, 1905	2 m	-			1
Animalia	Arthropoda	Malacostraca	Amphipoda	Phronimidae	Phronima sedentaria	(Forskål, 1775)	3 m	-			1
Animalia	Arthropoda	Malacostraca	Decapoda	Alpheidae	Alpheus dentipes	Guérin, 1832	-	Eggs (VI)			1
Animalia	Arthropoda	Malacostraca	Decapoda	Alpheidae	Synalpheus gambarelloides	(Nardo, 1847)	-	-			1
Animalia	Arthropoda	Malacostraca	Decapoda	Calappidae	Calappa granulata	(Linnaeus, 1758)	40-60 m	Eggs (II)			(common)
Animalia	Arthropoda	Malacostraca	Decapoda	Carcinidae	Xaiva biguttata	(Risso, 1816)	7 m	-			1
Animalia	Arthropoda	Malacostraca	Decapoda	Diogenidae	Calcinus tubularis	(Linnaeus, 1767)	1 m	-			1
Animalia	Arthropoda	Malacostraca	Decapoda	Diogenidae	Clibanarius erythropus	(Latreille, 1818)	1 m	-			(common)
Animalia	Arthropoda	Malacostraca	Decapoda	Diogenidae	Dardanus arrosor	(Herbst, 1796)	70 m	-			(common)
Animalia	Arthropoda	Malacostraca	Decapoda	Diogenidae	Dardanus calidus	(Risso, 1827 in [Risso, 1826-1827])	20-50 m	Eggs (VIII)			(common)
Animalia	Arthropoda	Malacostraca	Decapoda	Diogenidae	Diogenes pugilator complex	(P. Roux, 1829)	7 m	-			(common)
Animalia	Arthropoda	Malacostraca	Decapoda	Diogenidae	Paguristes eremita	(Linnaeus, 1767)	-	-			1
Animalia	Arthropoda	Malacostraca	Decapoda	Dorippidae	Medorippe lanata	(Linnaeus, 1767)	60 m	-			1
Animalia	Arthropoda	Malacostraca	Decapoda	Dromiidae	Dromia personata	(Linnaeus, 1758)	5-50 m	Eggs (VIII)			2
Animalia	Arthropoda	Malacostraca	Decapoda	Epialtidae	Acanthonyx lunulatus	(Risso, 1816)	1 m	-			1
Animalia	Arthropoda	Malacostraca	Decapoda	Epialtidae	Herbstia condyliata	(Fabricius, 1787)	4 m	-			2, (uncommon)
Animalia	Arthropoda	Malacostraca	Decapoda	Epialtidae	Pisa cf. armata	(Latreille, 1803)	70 m	-			1
Animalia	Arthropoda	Malacostraca	Decapoda	Epialtidae	Pisa cf. nodipes	Leach, 1815	60 m	-			1
Animalia	Arthropoda	Malacostraca	Decapoda	Eriphiidae	Eriphia verrucosa	(Forskål, 1775)	2 m	Eggs (VIII)			1
Animalia	Arthropoda	Malacostraca	Decapoda	Galatheidae	Galathea squamifera	Leach, 1814 [in Leach, 1813-1815]	5 m	-			1
Animalia	Arthropoda	Malacostraca	Decapoda	Goneplacidae	Goneplax rhomboides	(Linnaeus, 1758)	60 m	-			1
Animalia	Arthropoda	Malacostraca	Decapoda	Grapsidae	Pachygrapsus marmoratus	(Fabricius, 1787)	0 m	Eggs (VI)			(common)
Animalia	Arthropoda	Malacostraca	Decapoda	Homolidae	Homola barbata	(Fabricius, 1793)	60 m	Eggs (VI)			1
Animalia	Arthropoda	Malacostraca	Decapoda	Inachidae	Macropodia ind	Leach, 1814 [in Leach, 1813-1815]	20 m	-			2
Animalia	Arthropoda	Malacostraca	Decapoda	Leucosiidae	Ebalia edwardsii	O.G. Costa, 1838 [in O.G. Costa & A. Costa, 1838-1871]	25 m	-			1
Animalia	Arthropoda	Malacostraca	Decapoda	Leucosiidae	Ilia nucleus	(Linnaeus, 1758)	7 m	-			1
Animalia	Arthropoda	Malacostraca	Decapoda	Majidae	Maja crispata	Risso, 1827 in [Risso, 1826-1827]	-	-			1
Animalia	Arthropoda	Malacostraca	Decapoda	Majidae	Maja squinado	(Herbst, 1788)	50 m	Eggs (VI;IX)			(common)
Animalia	Arthropoda	Malacostraca	Decapoda	Majidae	Neomaja goltziana	(d'Oliveira, 1889)	-	-			(uncommon)
Animalia	Arthropoda	Malacostraca	Decapoda	Paguridae	Cestopagurus timidus	(P. Roux, 1830 [in P. Roux, 1828-1830])	5 m	-			(common)
Animalia	Arthropoda	Malacostraca	Decapoda	Paguridae	Pagurus anachoretus	Risso, 1827 in [Risso, 1826-1827]	-	-			1
Animalia	Arthropoda	Malacostraca	Decapoda	Palaemonidae	Brachycarpus biunguiculatus	(H. Lucas, 1846)	5 m	-			1
Animalia	Arthropoda	Malacostraca	Decapoda	Palaemonidae	Palaemon cf. serratus	(Pennant, 1777)	1 m	Eggs (VI)			1
Animalia	Arthropoda	Malacostraca	Decapoda	Palaemonidae	Palaemon elegans	Rathke, 1836	0-1 m	-			(common)
Animalia	Arthropoda	Malacostraca	Decapoda	Palaemonidae	Pontonia pinnophylax	(Otto, 1821)	10 m	-			1
Animalia	Arthropoda	Malacostraca	Decapoda	Palinuridae	Palinurus elephas	(Fabricius, 1787)	70 m	-			(common)
Animalia	Arthropoda	Malacostraca	Decapoda	Parthenopidae	Spinolambrus macrochelos	(Herbst, 1790 [in Herbst, 1782-1790])	70 m	-			1
Animalia	Arthropoda	Malacostraca	Decapoda	Penaeidae	Penaeus kerathurus	(Forskål, 1775)	20 m	-			1
Animalia	Arthropoda	Malacostraca	Decapoda	Percnidae	Percnon gibbesi	(H. Milne Edwards, 1853)	1 m	-		TRUE	(uncommon)
Animalia	Arthropoda	Malacostraca	Decapoda	Pilumnidae	Pilumnus hirtellus	(Linnaeus, 1761)	50 m	-			1
Animalia	Arthropoda	Malacostraca	Decapoda	Pilumnidae	Pilumnus spinifer	H. Milne Edwards, 1834	50 m	Eggs (V)			2
Animalia	Arthropoda	Malacostraca	Decapoda	Pilumnidae	Pilumnus villosissimus	(Rafinesque, 1814)	0 m	-			1
Animalia	Arthropoda	Malacostraca	Decapoda	Polybiidae	Liocarcinus vernalis	(Risso, 1827 in [Risso, 1826-1827])	0 m	-			1
Animalia	Arthropoda	Malacostraca	Decapoda	Portunidae	Callinectes sapidus	Rathbun, 1896	-	-		TRUE	1
Animalia	Arthropoda	Malacostraca	Decapoda	Portunidae	Portunus hastatus	(Linnaeus, 1767)	2-30 m	-			4
Animalia	Arthropoda	Malacostraca	Decapoda	Processidae	Processa ind	Leach, 1815 [in Leach, 1815-1875]	3 m	-			1
Animalia	Arthropoda	Malacostraca	Decapoda	Scyllaridae	Scyllarides latus	(Latreille, 1803)	60 m	Eggs (VI)			(common)
Animalia	Arthropoda	Malacostraca	Decapoda	Stenopodidae	Stenopus spinosus	Risso, 1827 in [Risso, 1826-1827]	3 m	-			1
Animalia	Arthropoda	Malacostraca	Decapoda	Xanthidae	Paractaea monodi	Guinot, 1969	5 m	-			(common)
Animalia	Arthropoda	Malacostraca	Decapoda	Xanthidae	Xantho granulicarpus	Forest in Drach & Forest, 1953	0 m	-			1
Animalia	Arthropoda	Malacostraca	Decapoda	Xanthidae	Xantho poressa	(Olivi, 1792)	0 m	-			1
Animalia	Arthropoda	Malacostraca	Isopoda	Gnathiidae	Gnathia ind	Leach, 1814	-	-			1
Animalia	Arthropoda	Malacostraca	Isopoda	Idoteidae	Idotea metallica	Bosc, 1802	0 m	-			2, (uncommon)
Animalia	Arthropoda	Malacostraca	Isopoda	Ligiidae	Ligia italica	Fabricius, 1798	0 m	-			(common)
Animalia	Arthropoda	Malacostraca	Stomatopoda	Squillidae	Squilla mantis	(Linnaeus, 1758)	60 m	-			(common)
Animalia	Brachiopoda	Rhynchonellata	Terebratulida	Megathyrididae	Argyrotheca cuneata	(Risso, 1826)	70 m	-			1
Animalia	Bryozoa	Gymnolaemata	Cheilostomatida	Adeonidae	Adeonella pallasii	(Heller, 1867)	20 m	-			1
Animalia	Bryozoa	Gymnolaemata	Cheilostomatida	Adeonidae	Reptadeonella violacea	(Johnston, 1847)	30 m	-			1
Animalia	Bryozoa	Gymnolaemata	Cheilostomatida	Aeteidae	Aetea anguina	(Linnaeus, 1758)	0-5 m	-			(common)
Animalia	Bryozoa	Gymnolaemata	Cheilostomatida	Beaniidae	Beania magellanica	(Busk, 1852)	70 m	-			1
Animalia	Bryozoa	Gymnolaemata	Cheilostomatida	Bitectiporidae	Schizomavella ind	Canu & Bassler, 1917	70 m	-			1
Animalia	Bryozoa	Gymnolaemata	Cheilostomatida	Bugulidae	Bugulina calathus	(Norman, 1868)	50 m	-			1
Animalia	Bryozoa	Gymnolaemata	Cheilostomatida	Candidae	Caberea boryi	(Audouin, 1826)	20-30 m	-			2
Animalia	Bryozoa	Gymnolaemata	Cheilostomatida	Cellariidae	Cellaria salicornioides	Lamouroux, 1816	-	-			1
Animalia	Bryozoa	Gymnolaemata	Cheilostomatida	Flustridae	Chartella ind	Gray, 1848	70 m	-	Ionian Sea		(common)
Animalia	Bryozoa	Gymnolaemata	Cheilostomatida	Hippaliosinidae	Hippaliosina depressa	(Busk, 1854)	10 m	-			1
Animalia	Bryozoa	Gymnolaemata	Cheilostomatida	Microporidae	Calpensia nobilis	(Esper, 1796)	5-50 m	-			1
Animalia	Bryozoa	Gymnolaemata	Cheilostomatida	Myriaporidae	Myriapora truncata	(Pallas, 1766)	10-70 m	-			(common)
Animalia	Bryozoa	Gymnolaemata	Cheilostomatida	Phidoloporidae	Reteporella couchii	(Hincks, 1878)	25 m	-			1
Animalia	Bryozoa	Gymnolaemata	Cheilostomatida	Phidoloporidae	Reteporella grimaldii	(Jullien, 1903)	20 m	-			1
Animalia	Bryozoa	Gymnolaemata	Cheilostomatida	Phidoloporidae	Schizoretepora serratimargo	(Hincks, 1886)	10-25 m	-			(common)
Animalia	Bryozoa	Gymnolaemata	Cheilostomatida	Schizoporellidae	Schizobrachiella sanguinea	(Norman, 1868)	10 m	-			(common)
Animalia	Bryozoa	Gymnolaemata	Ctenostomatida	Mimosellidae	Mimosella gracilis	Hincks, 1851	15 m	-			(common)
Animalia	Bryozoa	Gymnolaemata	Ctenostomatida	Vesiculariidae	Amathia semiconvoluta	Lamouroux, 1824	-	-			1
Animalia	Bryozoa	Gymnolaemata	Ctenostomatida	Walkeriidae	Walkeria ind	Fleming, 1823	30 m	-			1
Animalia	Bryozoa	Stenolaemata	Cyclostomatida	Frondiporidae	Frondipora verrucosa	(Lamouroux, 1821)	60 m	-			1
Animalia	Chordata	Actinopterygii	Anguilliformes	Congridae	Conger conger	(Linnaeus, 1758)	2-4 m	-			(common)
Animalia	Chordata	Actinopterygii	Anguilliformes	Muraenidae	Muraena helena	Linnaeus, 1758	8-11 m	-			(common)
Animalia	Chordata	Actinopterygii	Atheriniformes	Atherinidae	Atherina boyeri	Risso, 1810	2 m	-			(common)
Animalia	Chordata	Actinopterygii	Atheriniformes	Atherinidae	Atherina hepsetus	Linnaeus, 1758	2 m	-			1
Animalia	Chordata	Actinopterygii	Aulopiformes	Synodontidae	Synodus saurus	(Linnaeus, 1758)	1-10 m	-			1
Animalia	Chordata	Actinopterygii	Beloniformes	Belonidae	Belone belone	(Linnaeus, 1760)	1 m	-			(common)
Animalia	Chordata	Actinopterygii	Clupeiformes	Clupeidae	Sardina pilchardus	(Walbaum, 1792)	25 m	-			(common)
Animalia	Chordata	Actinopterygii	Clupeiformes	Clupeidae	Sardinella aurita	Valenciennes, 1847	-	-			(common)
Animalia	Chordata	Actinopterygii	Clupeiformes	Engraulidae	Engraulis encrasicolus	(Linnaeus, 1758)	1-5 m	-			(common)
Animalia	Chordata	Actinopterygii	Gadiformes	Merlucciidae	Merluccius merluccius	(Linnaeus, 1758)	-	-			1
Animalia	Chordata	Actinopterygii	Gadiformes	Phycidae	Phycis phycis	(Linnaeus, 1766)	30 m	-			(common)
Animalia	Chordata	Actinopterygii	Lophiiformes	Lophiidae	Lophius ind	Linnaeus, 1758	60 m	-			(common)
Animalia	Chordata	Actinopterygii	Mugiliformes	Mugilidae	Chelon auratus	(Risso, 1810)	2 m	-			(common)
Animalia	Chordata	Actinopterygii	Mugiliformes	Mugilidae	Chelon labrosus	(Risso, 1827)	1 m	-			(common)
Animalia	Chordata	Actinopterygii	Perciformes	Apogonidae	Apogon imberbis	(Linnaeus, 1758)	5 m	-			(common)
Animalia	Chordata	Actinopterygii	Perciformes	Blenniidae	Aidablennius sphynx	(Valenciennes, 1836)	1 m	-			1
Animalia	Chordata	Actinopterygii	Perciformes	Blenniidae	Coryphoblennius galerita	(Linnaeus, 1758)	0 m	-			1
Animalia	Chordata	Actinopterygii	Perciformes	Blenniidae	Lipophrys trigloides	(Valenciennes, 1836)	1 m	-			1
Animalia	Chordata	Actinopterygii	Perciformes	Blenniidae	Microlipophrys canevae	(Vinciguerra, 1880)	1 m	-			1
Animalia	Chordata	Actinopterygii	Perciformes	Blenniidae	Parablennius gattorugine	(Linnaeus, 1758)	8-11 m	-			(common)
Animalia	Chordata	Actinopterygii	Perciformes	Blenniidae	Parablennius incognitus	(Bath, 1968)	2 m	-			1
Animalia	Chordata	Actinopterygii	Perciformes	Blenniidae	Parablennius rouxi	(Cocco, 1833)	10 m	-			1
Animalia	Chordata	Actinopterygii	Perciformes	Blenniidae	Parablennius sanguinolentus	(Pallas, 1814)	0-3	-			3
Animalia	Chordata	Actinopterygii	Perciformes	Blenniidae	Parablennius zvonimiri	(Kolombatovic, 1892)	3 m	-			1
Animalia	Chordata	Actinopterygii	Perciformes	Carangidae	Lichia amia	(Linnaeus, 1758)	1 m	Sperm (XI)			1
Animalia	Chordata	Actinopterygii	Perciformes	Carangidae	Seriola dumerili	(Risso, 1810)	2 m	-			(common)
Animalia	Chordata	Actinopterygii	Perciformes	Carangidae	Trachinotus ovatus	(Linnaeus, 1758)	3 m	-			1
Animalia	Chordata	Actinopterygii	Perciformes	Carangidae	Trachurus trachurus	(Linnaeus, 1758)	60 m	-			(common)
Animalia	Chordata	Actinopterygii	Perciformes	Centracanthidae	Spicara maena	(Linnaeus, 1758)	-	-			(common)
Animalia	Chordata	Actinopterygii	Perciformes	Centracanthidae	Spicara smaris	(Linnaeus, 1758)	7-25 m	Reproductive behaviour (IV)			(common)
Animalia	Chordata	Actinopterygii	Perciformes	Gobiidae	Gobius cobitis	Pallas, 1814	0-3	-			1
Animalia	Chordata	Actinopterygii	Perciformes	Gobiidae	Gobius geniporus	Valenciennes, 1837	7 m	-			1
Animalia	Chordata	Actinopterygii	Perciformes	Gobiidae	Gobius incognitus	Kovačić & Sanda, 2016	1-11 m	-			1
Animalia	Chordata	Actinopterygii	Perciformes	Labridae	Coris julis	(Linnaeus, 1758)	1-15 m	-			(common)
Animalia	Chordata	Actinopterygii	Perciformes	Labridae	Labrus merula	Linnaeus, 1758	20 m	-			(common)
Animalia	Chordata	Actinopterygii	Perciformes	Labridae	Symphodus doderleini	Jordan, 1890	3 m	-			1
Animalia	Chordata	Actinopterygii	Perciformes	Labridae	Symphodus mediterraneus	(Linnaeus, 1758)	25 m	-			(common)
Animalia	Chordata	Actinopterygii	Perciformes	Labridae	Symphodus ocellatus	(Linnaeus, 1758)	2 m	-			1
Animalia	Chordata	Actinopterygii	Perciformes	Labridae	Symphodus roissali	(Risso, 1810)	2 m	-			1
Animalia	Chordata	Actinopterygii	Perciformes	Labridae	Symphodus rostratus	(Bloch, 1791)	5 m	-			1
Animalia	Chordata	Actinopterygii	Perciformes	Labridae	Symphodus tinca	(Linnaeus, 1758)	3 m	Reproductive behaviour (VI-VII)			(common)
Animalia	Chordata	Actinopterygii	Perciformes	Labridae	Thalassoma pavo	(Linnaeus, 1758)	1-5 m	-			(common)
Animalia	Chordata	Actinopterygii	Perciformes	Labridae	Xyrichtys novacula	(Linnaeus, 1758)	18 m	-			1
Animalia	Chordata	Actinopterygii	Perciformes	Mullidae	Mullus barbatus barbatus	Linnaeus, 1758	60 m	-			(common)
Animalia	Chordata	Actinopterygii	Perciformes	Mullidae	Mullus surmuletus	Linnaeus, 1758	60 m	-			(common)
Animalia	Chordata	Actinopterygii	Perciformes	Pomacentridae	Chromis chromis	(Linnaeus, 1758)	1-20 m	Reproductive behaviour (VIII)			(common)
Animalia	Chordata	Actinopterygii	Perciformes	Pomatomidae	Pomatomus saltatrix	(Linnaeus, 1766)	-	-			1
Animalia	Chordata	Actinopterygii	Perciformes	Scaridae	Sparisoma cretense	(Linnaeus, 1758)	3 m	-			1
Animalia	Chordata	Actinopterygii	Perciformes	Sciaenidae	Sciaena umbra	Linnaeus, 1758	23 m	-			(common)
Animalia	Chordata	Actinopterygii	Perciformes	Scombridae	Auxis rochei rochei	(Risso, 1810)	-	-			(common)
Animalia	Chordata	Actinopterygii	Perciformes	Scombridae	Euthynnus alletteratus	(Rafinesque, 1810)	1 m	-			(common)
Animalia	Chordata	Actinopterygii	Perciformes	Scombridae	Sarda sarda	(Bloch, 1793)	20 m	-			(common)
Animalia	Chordata	Actinopterygii	Perciformes	Scombridae	Scomber colias	Gmelin, 1789	18 m	-			1
Animalia	Chordata	Actinopterygii	Perciformes	Scombridae	Scomber scombrus	Linnaeus, 1758	60 m	-			(common)
Animalia	Chordata	Actinopterygii	Perciformes	Serranidae	Anthias anthias	(Linnaeus, 1758)	40 m	-			(common)
Animalia	Chordata	Actinopterygii	Perciformes	Serranidae	Epinephelus costae	(Steindachner, 1878)	30 m	-
Animalia	Chordata	Actinopterygii	Perciformes	Serranidae	Epinephelus marginatus	(Lowe, 1834)	4 m	-			(common)
Animalia	Chordata	Actinopterygii	Perciformes	Serranidae	Serranus cabrilla	(Linnaeus, 1758)	4-15 m	-			(common)
Animalia	Chordata	Actinopterygii	Perciformes	Serranidae	Serranus hepatus	(Linnaeus, 1758)	7-25 m	-			(common)
Animalia	Chordata	Actinopterygii	Perciformes	Serranidae	Serranus scriba	(Linnaeus, 1758)	2-18 m	-			(common)
Animalia	Chordata	Actinopterygii	Perciformes	Sparidae	Boops boops	(Linnaeus, 1758)	1-10 m	-			(common)
Animalia	Chordata	Actinopterygii	Perciformes	Sparidae	Dentex dentex	(Linnaeus, 1758)	-	-			1
Animalia	Chordata	Actinopterygii	Perciformes	Sparidae	Diplodus puntazzo	(Walbaum, 1792)	5-15 m	-			(common)
Animalia	Chordata	Actinopterygii	Perciformes	Sparidae	Diplodus sargus	(Linnaeus, 1758)	7 m	-			(common)
Animalia	Chordata	Actinopterygii	Perciformes	Sparidae	Diplodus vulgaris	(Geoffroy Saint-Hilaire, 1817)	5-15 m	-			(common)
Animalia	Chordata	Actinopterygii	Perciformes	Sparidae	Lithognathus mormyrus	(Linnaeus, 1758)	7 m	-			(common)
Animalia	Chordata	Actinopterygii	Perciformes	Sparidae	Oblada melanura	(Linnaeus, 1758)	1 m	-			(common)
Animalia	Chordata	Actinopterygii	Perciformes	Sparidae	Pagellus acarne	(Risso, 1827)	20 m	-			(common)
Animalia	Chordata	Actinopterygii	Perciformes	Sparidae	Pagellus bogaraveo	(Brünnich, 1768)	0-3	-			1
Animalia	Chordata	Actinopterygii	Perciformes	Sparidae	Pagellus erythrinus	(Linnaeus, 1758)	20 m	-			1
Animalia	Chordata	Actinopterygii	Perciformes	Sparidae	Pagrus pagrus	(Linnaeus, 1758)	0-3	-			(common)
Animalia	Chordata	Actinopterygii	Perciformes	Sparidae	Sarpa salpa	(Linnaeus, 1758)	30 m	-			(common)
Animalia	Chordata	Actinopterygii	Perciformes	Sparidae	Sparus aurata	Linnaeus, 1758	2 m	-			(common)
Animalia	Chordata	Actinopterygii	Perciformes	Sparidae	Spondyliosoma cantharus	(Linnaeus, 1758)	0-2 m	-			1
Animalia	Chordata	Actinopterygii	Perciformes	Sphyraenidae	Sphyraena sphyraena	(Linnaeus, 1758)	30 m	-			1
Animalia	Chordata	Actinopterygii	Perciformes	Trachinidae	Trachinus araneus	Cuvier, 1829	25 m	-			1
Animalia	Chordata	Actinopterygii	Perciformes	Tripterygiidae	Tripterygion tripteronotum	(Risso, 1810)	0-3	-			(common)
Animalia	Chordata	Actinopterygii	Perciformes	Uranoscopidae	Uranoscopus scaber	Linnaeus, 1758	30 m	-			(common)
Animalia	Chordata	Actinopterygii	Pleuronectiformes	Bothidae	Bothus podas	(Delaroche, 1809)	1-4 m	-			(common)
Animalia	Chordata	Actinopterygii	Pleuronectiformes	Soleidae	Microchirus ocellatus	(Linnaeus, 1758)	20 m	-			1
Animalia	Chordata	Actinopterygii	Pleuronectiformes	Soleidae	Solea solea	(Linnaeus, 1758)	20 m	-			(common)
Animalia	Chordata	Actinopterygii	Scorpaeniformes	Dactylopteridae	Dactylopterus volitans	(Linnaeus, 1758)	-	-			3
Animalia	Chordata	Actinopterygii	Scorpaeniformes	Scorpaenidae	Scorpaena maderensis	Valenciennes, 1833	3-15 m	-			1
Animalia	Chordata	Actinopterygii	Scorpaeniformes	Scorpaenidae	Scorpaena notata	Rafinesque, 1810	20 m	-			(common)
Animalia	Chordata	Actinopterygii	Scorpaeniformes	Scorpaenidae	Scorpaena porcus	Linnaeus, 1758	16 m	-			(common)
Animalia	Chordata	Actinopterygii	Scorpaeniformes	Scorpaenidae	Scorpaena scrofa	Linnaeus, 1758	25 m	-			(common)
Animalia	Chordata	Actinopterygii	Scorpaeniformes	Triglidae	Chelidonichthys lastoviza	(Bonnaterre, 1788)	-	-			2
Animalia	Chordata	Actinopterygii	Tetraodontiformes	Balistidae	Balistes capriscus	Gmelin, 1789	15 m	-			1
Animalia	Chordata	Actinopterygii	Zeiformes	Zeidae	Zeus faber	Linnaeus, 1758	67 m	-			(common)
Animalia	Chordata	Ascidiacea	Aplousobranchia	Clavelinidae	Pycnoclavella ind	Garstang, 1891	15 m	-	Ionian Sea		1, (rare)
Animalia	Chordata	Ascidiacea	Aplousobranchia	Didemnidae	Diplosoma spongiforme	(Giard, 1872)	1-60 m	-			2
Animalia	Chordata	Ascidiacea	Aplousobranchia	Polycitoridae	Polycitor crystallinus	(Renier, 1804)	30 m	-			1
Animalia	Chordata	Ascidiacea	Aplousobranchia	Polyclinidae	Aplidium ind	Savigny, 1816	15 m	-			1
Animalia	Chordata	Ascidiacea	Phlebobranchia	Ascidiidae	Ascidia mentula	Müller, 1776	4 m	-			17
Animalia	Chordata	Ascidiacea	Stolidobranchia	Pyuridae	Halocynthia papillosa	(Linnaeus, 1767)	5-30 m	-			1
Animalia	Chordata	Ascidiacea	Stolidobranchia	Pyuridae	Microcosmus ind	Heller, 1877	20 m	-			1
Animalia	Chordata	Ascidiacea	Stolidobranchia	Pyuridae	Pyura tessellata	(Forbes, 1848)	60 m	-			1
Animalia	Chordata	Ascidiacea	Stolidobranchia	Styelidae	Botrylloides niger	Herdman, 1886	1-3 m	-		TRUE	(uncommon)
Animalia	Chordata	Elasmobranchii	Myliobatiformes	Dasyatidae	Dasyatis pastinaca	(Linnaeus, 1758)	20 m	-			1
Animalia	Chordata	Elasmobranchii	Rajiformes	Rajidae	Raja brachyura	Lafont, 1871	20 m	-			1
Animalia	Chordata	Elasmobranchii	Rajiformes	Rajidae	Raja miraletus	Linnaeus, 1758	67 m	Eggs (V)			1
Animalia	Chordata	Elasmobranchii	Torpediniformes	Torpedinidae	Torpedo marmorata	Risso, 1810	5 m	-			2
Animalia	Chordata	Leptocardii		Branchiostomatidae	Branchiostoma lanceolatum	(Pallas, 1774)	7-11 m	-			(uncommon)
Animalia	Chordata	Mammalia	Cetartiodactyla	Delphinidae	Tursiops truncatus	(Montagu, 1821)	0 m	-			(common)
Animalia	Chordata	Reptilia	Testudines	Cheloniidae	Caretta caretta	(Linnaeus, 1758)	2 m	-			1, (rare)
Animalia	Chordata	Thaliacea	Salpida	Salpidae	Helicosalpa virgula	(Vogt, 1854)	3 m	Occurrence (IV)	Ionian Sea; Easternmost in the Med		1, (rare)
Animalia	Chordata	Thaliacea	Salpida	Salpidae	Salpa fusiformis	Cuvier, 1804	0-5 m	Occurrence (III-IV)			(common)
Animalia	Chordata	Thaliacea	Salpida	Salpidae	Salpa maxima	Forskål, 1775	0-5 m	Occurrence (IV-V)			(common)
Animalia	Cnidaria	Anthozoa	Actiniaria	Actiniidae	Actinia mediterranea	Schmidt, 1971	0 m	-			(common)
Animalia	Cnidaria	Anthozoa	Actiniaria	Actiniidae	Anemonia viridis	(Forsskål, 1775)	10 m	-			(common)
Animalia	Cnidaria	Anthozoa	Actiniaria	Actiniidae	Condylactis aurantiaca	(Delle Chiaje, 1825)	28 m	-			1, (rare)
Animalia	Cnidaria	Anthozoa	Actiniaria	Actiniidae	Paranemonia cinerea	(Contarini, 1844)	3 m	-	Ionian Sea		(common)
Animalia	Cnidaria	Anthozoa	Actiniaria	Aiptasiidae	Aiptasia mutabilis	(Gravenhorst, 1831)	3 m	-			(common)
Animalia	Cnidaria	Anthozoa	Actiniaria	Aiptasiidae	Exaiptasia diaphana	(Rapp, 1829)	8 m	-			(common)
Animalia	Cnidaria	Anthozoa	Actiniaria	Halcampidae	Halcampoides purpureus	(Studer, 1879)	4 m	-	Ionian Sea		1
Animalia	Cnidaria	Anthozoa	Actiniaria	Hormathiidae	Calliactis parasitica	(Couch, 1842)	20-50 m	-			(common)
Animalia	Cnidaria	Anthozoa	Actiniaria	Phymanthidae	Phymanthus pulcher	(Andrès, 1883)	23 m	-	Ionian Sea		1
Animalia	Cnidaria	Anthozoa	Alcyonacea	Alcyoniidae	Alcyonium cf. coralloides	(Pallas, 1766)	45 m	-	Strait of Messina		1
Animalia	Cnidaria	Anthozoa	Alcyonacea	Alcyoniidae	Alcyonium palmatum	Pallas, 1766	60 m	-			2
Animalia	Cnidaria	Anthozoa	Alcyonacea	Coralliidae	Corallium rubrum	(Linnaeus, 1758)	60 m	-			1
Animalia	Cnidaria	Anthozoa	Alcyonacea	Cornulariidae	Cornularia cornucopiae	(Pallas, 1766)	5-70 m	-	Ionian Sea		2
Animalia	Cnidaria	Anthozoa	Alcyonacea	Gorgoniidae	Eunicella cavolini	(Koch, 1887)	40 m	-			1
Animalia	Cnidaria	Anthozoa	Alcyonacea	Gorgoniidae	Leptogorgia sarmentosa	(Esper, 1789)	30 m	-			(uncommon)
Animalia	Cnidaria	Anthozoa	Alcyonacea	Plexauridae	Paramuricea clavata	(Risso, 1826)	55 m	-			(uncommon)
Animalia	Cnidaria	Anthozoa	Antipatharia	Myriopathidae	Antipathella subpinnata	(Ellis & Solander, 1786)	80 m	-			1
Animalia	Cnidaria	Anthozoa	Penicillaria	Arachnactidae	Arachnanthus cf. oligopodus	(Cerfontaine, 1891)	4 m	-			1
Animalia	Cnidaria	Anthozoa	Pennatulacea	Pennatulidae	Pteroeides griseum	(Bohadsch, 1761)	70 m	-			1
Animalia	Cnidaria	Anthozoa	Pennatulacea	Virgulariidae	Virgularia mirabilis	(Müller, 1776)	70 m	-	Ionian Sea		1
Animalia	Cnidaria	Anthozoa	Scleractinia	Caryophylliidae	Caryophyllia (Caryophyllia) cf. inornata	(Duncan, 1878)	3 m	-			1
Animalia	Cnidaria	Anthozoa	Scleractinia	Caryophylliidae	Paracyathus pulchellus	(Philippi, 1842)	70 m	-			(uncommon)
Animalia	Cnidaria	Anthozoa	Scleractinia	Caryophylliidae	Phyllangia americana mouchezii	(Lacaze-Duthiers, 1897)	40 m	-			1
Animalia	Cnidaria	Anthozoa	Scleractinia	Caryophylliidae	Polycyathus muellerae	(Abel, 1959)	4 m	-			1
Animalia	Cnidaria	Anthozoa	Scleractinia	Dendrophylliidae	Balanophyllia (Balanophyllia) europaea	(Risso, 1826)	4-15 m	-			(common)
Animalia	Cnidaria	Anthozoa	Scleractinia	Pocilloporidae	Madracis pharensis	(Heller, 1868)	15 m	-			(common)
Animalia	Cnidaria	Anthozoa	Scleractinia	Scleractinia incertae sedis	Cladocora caespitosa	(Linnaeus, 1767)	8 m	-			(common)
Animalia	Cnidaria	Anthozoa	Spirularia	Cerianthidae	Cerianthus membranaceus	(Gmelin, 1791)	10-20 m	-			(common)
Animalia	Cnidaria	Anthozoa	Zoantharia	Epizoanthidae	Epizoanthus ind	Gray, 1867	60 m	-			2
Animalia	Cnidaria	Anthozoa	Zoantharia	Parazoanthidae	Parazoanthus axinellae	(Schmidt, 1862)	21 m	-			(common)
Animalia	Cnidaria	Anthozoa	Zoantharia	Parazoanthidae	Savalia savaglia	(Bertoloni, 1819)	60 m	-			(uncommon)
Animalia	Cnidaria	Hydrozoa	Anthoathecata	Corynidae	Coryne pintneri	Schneider, 1897	10-60 m	Reproductive structures (VII)			(common)
Animalia	Cnidaria	Hydrozoa	Anthoathecata	Eudendriidae	Eudendrium merulum	Watson, 1985	25 m	-		TRUE	1
Animalia	Cnidaria	Hydrozoa	Anthoathecata	Eudendriidae	Eudendrium moulouyensis	Marques, Peña Cantero & Vervoort, 2000	5 m	Reproductive structures (IX)			1
Animalia	Cnidaria	Hydrozoa	Anthoathecata	Eudendriidae	Eudendrium racemosum	(Cavolini, 1785)	20 m	-			(common)
Animalia	Cnidaria	Hydrozoa	Anthoathecata	Oceaniidae	Corydendrium parasiticum	(Linnaeus, 1767)	1 m	-			1
Animalia	Cnidaria	Hydrozoa	Anthoathecata	Oceaniidae	Oceania armata	Kölliker, 1853	1 m	Medusa stage occurrence, Eggs (IV)	Strait of Messina		(common)
Animalia	Cnidaria	Hydrozoa	Anthoathecata	Oceaniidae	Rhizogeton nudus	Broch, 1910	3 m	-			1
Animalia	Cnidaria	Hydrozoa	Anthoathecata	Oceaniidae	Turritopsis dohrnii	(Weismann, 1883)	2-70 m	Medusa stage occurrence (VII-IX)			3
Animalia	Cnidaria	Hydrozoa	Anthoathecata	Pandeidae	Amphinema rugosum	(Mayer, 1900)	25 m	-			1
Animalia	Cnidaria	Hydrozoa	Anthoathecata	Pennariidae	Pennaria disticha	Goldfuss, 1820	3 m	-			3, (uncommon)
Animalia	Cnidaria	Hydrozoa	Anthoathecata	Proboscidactylidae	Proboscidactyla ornata	(McCrady, 1859)	70 m	Medusa stage occurrence (VI)	Ionian Sea		1
Animalia	Cnidaria	Hydrozoa	Anthoathecata	Tubulariidae	Ectopleura wrighti	Petersen, 1979	20 m	-			1
Animalia	Cnidaria	Hydrozoa	Anthoathecata	Zancleidae	Halocoryne epizoica	Hadzi, 1917	10-20 m	Medusa stage occurrence (VI)			2
Animalia	Cnidaria	Hydrozoa	Anthoathecata	Zancleidae	Zanclea giancarloi	Boero, Bouillon & Gravili, 2000	70 m	-			1
Animalia	Cnidaria	Hydrozoa	Leptothecata	Aequoreidae	Aequorea forskalea	Péron & Lesueur, 1810	0-5 m	Medusa stage occurrence (IV)			(common)
Animalia	Cnidaria	Hydrozoa	Leptothecata	Aglaopheniidae	Aglaophenia elongata	Meneghini, 1845	11-50 m	-			2
Animalia	Cnidaria	Hydrozoa	Leptothecata	Aglaopheniidae	Aglaophenia kirchenpaueri	(Heller, 1868)	50 m	Reproductive structures (IV)			1
Animalia	Cnidaria	Hydrozoa	Leptothecata	Aglaopheniidae	Aglaophenia octodonta	(Heller, 1868)	1-5 m	Reproductive structures (IV)			(common)
Animalia	Cnidaria	Hydrozoa	Leptothecata	Aglaopheniidae	Aglaophenia tubiformis	Marktanner-Turneretscher, 1890	11 m	Reproductive structures (V)			1
Animalia	Cnidaria	Hydrozoa	Leptothecata	Campanulariidae	Clytia hemisphaerica	(Linnaeus, 1767)	11 m	-			2
Animalia	Cnidaria	Hydrozoa	Leptothecata	Campanulariidae	Clytia hummelincki	(Leloup, 1935)	5 m	-			1
Animalia	Cnidaria	Hydrozoa	Leptothecata	Campanulariidae	Clytia linearis	(Thorneley, 1900)	30 m	-		TRUE	1
Animalia	Cnidaria	Hydrozoa	Leptothecata	Campanulariidae	Obelia dichotoma	(Linnaeus, 1758)	3-4 m	-			(common)
Animalia	Cnidaria	Hydrozoa	Leptothecata	Campanulariidae	Orthopyxis integra	(MacGillivray, 1842)	0 m	-			1
Animalia	Cnidaria	Hydrozoa	Leptothecata	Haleciidae	Halecium petrosum	Stechow, 1919	5 m	-			1
Animalia	Cnidaria	Hydrozoa	Leptothecata	Haleciidae	Halecium pusillum	Sars, 1856	3 m	-			1
Animalia	Cnidaria	Hydrozoa	Leptothecata	Halopterididae	Antennella secundaria	(Gmelin, 1791)	3-11 m	-			1
Animalia	Cnidaria	Hydrozoa	Leptothecata	Halopterididae	Antennella siliquosa	(Hincks, 1877)	15 m	-			(common)
Animalia	Cnidaria	Hydrozoa	Leptothecata	Hebellidae	Anthohebella parasitica	(Ciamician, 1880)	1-2 m	-			2
Animalia	Cnidaria	Hydrozoa	Leptothecata	Hebellidae	Scandia gigas	(Pieper, 1884)	10 m	-			1
Animalia	Cnidaria	Hydrozoa	Leptothecata	Kirchenpaueriidae	Kirchenpaueria pinnata	(Linnaeus, 1758)	0-20 m	-			3
Animalia	Cnidaria	Hydrozoa	Leptothecata	Lafoeidae	Filellum serpens	(Hassall, 1848)	-	-			1
Animalia	Cnidaria	Hydrozoa	Leptothecata	Laodiceidae	Laodicea undulata	(Forbes & Goodsir, 1853)	45 m	-			2
Animalia	Cnidaria	Hydrozoa	Leptothecata	Plumulariidae	Monotheca obliqua	(Johnston, 1847)	2 m	-			1
Animalia	Cnidaria	Hydrozoa	Leptothecata	Plumulariidae	Nemertesia ramosa	(Lamarck, 1816)	70 m	-			1
Animalia	Cnidaria	Hydrozoa	Leptothecata	Plumulariidae	Plumularia posidoniae	(Picard, 1952)	12 m	-			2
Animalia	Cnidaria	Hydrozoa	Leptothecata	Plumulariidae	Plumularia setacea	(Linnaeus, 1758)	3-5 m	-			(common)
Animalia	Cnidaria	Hydrozoa	Leptothecata	Sertularellidae	Sertularella ellisii	(Deshayes & Milne Edwards, 1836)	3-60 m	Reproductive structures (VI)			(common)
Animalia	Cnidaria	Hydrozoa	Leptothecata	Sertularellidae	Sertularella gayi	(Lamouroux, 1821)	70 m	-			1
Animalia	Cnidaria	Hydrozoa	Leptothecata	Sertularellidae	Sertularella mediterranea	Hartlaub, 1901	50 m	-			1
Animalia	Cnidaria	Hydrozoa	Leptothecata	Sertulariidae	Dynamena disticha	(Bosc, 1802)	2 m	-			1
Animalia	Cnidaria	Hydrozoa	Leptothecata	Syntheciidae	Synthecium evansi	(Ellis & Solander, 1786)	70 m	-			1
Animalia	Cnidaria	Hydrozoa	Limnomedusae	Geryoniidae	Geryonia proboscidalis	(Forsskål, 1775)	3 m	Medusa stage occurrence (IV)	Strait of Messina		1, (rare)
Animalia	Cnidaria	Hydrozoa	Limnomedusae	Olindiidae	Olindias muelleri	Haeckel, 1879	7 m	Medusa stage occurrence (IX)			1, (rare)
Animalia	Cnidaria	Hydrozoa	Siphonophorae	Agalmatidae	Halistemma rubrum	(Vogt, 1852)	0 m	Occurrence (IV)	Ionian Sea		1
Animalia	Cnidaria	Hydrozoa	Siphonophorae	Agalmatidae	Nanomia bijuga	(Delle Chiaje, 1844)	5 m	Occurrence (IV)			1
Animalia	Cnidaria	Hydrozoa	Siphonophorae	Forskaliidae	Forskalia formosa	Keferstein & Ehlers, 1860	1-2 m	Occurrence (IV)	Strait of Messina		3
Animalia	Cnidaria	Hydrozoa	Siphonophorae	Hippopodiidae	Hippopodius hippopus	(Forsskål, 1776)	1 m	Occurrence (IV-V)			3
Animalia	Cnidaria	Hydrozoa	Siphonophorae	Prayidae	Rosacea cymbiformis	(Delle Chiaje, 1830)	0-5 m	Occurrence (IV-V)			2
Animalia	Cnidaria	Scyphozoa	Coronatae	Nausithoidae	Nausithoe ind	Kölliker, 1853	70 m	-			1
Animalia	Cnidaria	Scyphozoa	Rhizostomeae	Cepheidae	Cotylorhiza tuberculata	(Macri, 1778)	1 m	Medusa stage occurrence (VII)			(uncommon)
Animalia	Cnidaria	Scyphozoa	Rhizostomeae	Rhizostomatidae	Rhizostoma pulmo	(Macri, 1778)	2 m	Medusa stage occurrence (II; VI)			(uncommon)
Animalia	Cnidaria	Scyphozoa	Semaeostomeae	Pelagiidae	Chrysaora hysoscella	(Linnaeus, 1767)	0-2 m	Medusa stage occurrence (IV-V)			(common)
Animalia	Cnidaria	Scyphozoa	Semaeostomeae	Ulmaridae	Aurelia solida	Browne, 1905	0-5 m	Medusa stage occurrence (IV-V)			(common)
Animalia	Ctenophora	Tentaculata	Cestida	Cestidae	Cestum veneris	Lesueur, 1813	3 m	Occurrence (V)	Strait of Messina		1
Animalia	Ctenophora	Tentaculata	Cydippida	Lampeidae	Lampea pancerina	(Chun, 1879)	3 m	Occurrence (IV)	Strait of Messina; Easternmost in the Med		1
Animalia	Ctenophora	Tentaculata	Lobata	Bolinopsidae	Mnemiopsis leidyi	A. Agassiz, 1865	1-5 m	Occurrence (XI-I)		TRUE	(common)
Animalia	Ctenophora	Tentaculata	Lobata	Leucotheidae	Leucothea multicornis	(Quoy & Gaimard, 1824)	0-3 m	Occurrence (IV-IX)			(common)
Animalia	Echinodermata	Asteroidea	Forcipulatida	Asteriidae	Coscinasterias tenuispina	(Lamarck, 1816)	6 m	-			(common)
Animalia	Echinodermata	Asteroidea	Forcipulatida	Asteriidae	Marthasterias glacialis	(Linnaeus, 1758)	3-15 m	-			(common)
Animalia	Echinodermata	Asteroidea	Paxillosida	Astropectinidae	Astropecten aranciacus	(Linnaeus, 1758)	10-34 m	-			2
Animalia	Echinodermata	Asteroidea	Spinulosida	Echinasteridae	Echinaster (Echinaster) sepositus	(Retzius, 1783)	60 m	-			1
Animalia	Echinodermata	Asteroidea	Valvatida	Chaetasteridae	Chaetaster longipes	(Bruzelius, 1805)	70 m	-			1
Animalia	Echinodermata	Asteroidea	Valvatida	Goniasteridae	Peltaster placenta	(Müller & Troschel, 1842)	45 m	-			1
Animalia	Echinodermata	Asteroidea	Valvatida	Ophidiasteridae	Hacelia attenuata	Gray, 1840	25 m	-			1
Animalia	Echinodermata	Asteroidea	Valvatida	Ophidiasteridae	Ophidiaster ophidianus	(Lamarck, 1816)	10 m	-			1
Animalia	Echinodermata	Crinoidea	Comatulida	Antedonidae	Antedon mediterranea	(Lamarck, 1816)	45 m	-			1
Animalia	Echinodermata	Echinoidea	Arbacioida	Arbaciidae	Arbacia lixula	(Linnaeus, 1758)	1-12 m	-			(common)
Animalia	Echinodermata	Echinoidea	Camarodonta	Echinidae	Echinus melo	Lamarck, 1816	50 m	-			1
Animalia	Echinodermata	Echinoidea	Camarodonta	Parechinidae	Paracentrotus lividus	(Lamarck, 1816)	1-10 m	-			(common)
Animalia	Echinodermata	Echinoidea	Camarodonta	Parechinidae	Psammechinus microtuberculatus	(Blainville, 1825)	34 m	-			1
Animalia	Echinodermata	Echinoidea	Camarodonta	Toxopneustidae	Sphaerechinus granularis	(Lamarck, 1816)	8 m	-			(common)
Animalia	Echinodermata	Echinoidea	Cidaroida	Cidaridae	Cidaris cidaris	(Linnaeus, 1758)	70 m	-			(common)
Animalia	Echinodermata	Echinoidea	Cidaroida	Cidaridae	Stylocidaris affinis	(Philippi, 1845)	70 m	-			(common)
Animalia	Echinodermata	Echinoidea	Clypeasteroida	Fibulariidae	Echinocyamus pusillus	(O.F. Müller, 1776)	18 m	-			1
Animalia	Echinodermata	Echinoidea	Diadematoida	Diadematidae	Centrostephanus longispinus	(Philippi, 1845)	50 m	-			1
Animalia	Echinodermata	Holothuroidea	Holothuriida	Holothuriidae	Holothuria (Holothuria) tubulosa	Gmelin, 1791	7 m	-			(common)
Animalia	Echinodermata	Holothuroidea	Holothuriida	Holothuriidae	Holothuria (Panningothuria) forskali	Delle Chiaje, 1823	2 m	-			1
Animalia	Echinodermata	Holothuroidea	Holothuriida	Holothuriidae	Holothuria (Platyperona) sanctori	Delle Chiaje, 1823	4 m	-	Strait of Messina		1
Animalia	Echinodermata	Holothuroidea	Synallactida	Stichopodidae	Parastichopus regalis	(Cuvier, 1817)	60 m	-			1
Animalia	Echinodermata	Ophiuroidea	Amphilepidida	Ophiotrichidae	Ophiothrix fragilis	(Abildgaard in O.F. Müller, 1789)	30-50 m	-			(common)
Animalia	Echinodermata	Ophiuroidea	Ophiacanthida	Ophiodermatidae	Ophioderma longicaudum	(Bruzelius, 1805)	10 m	-			1
Animalia	Hemichordata	Graptolithoidea	Rhabdopleuroidea	Rhabdopleuridae	Rhabdopleura recondita	Beli, Cameron and Piraino, 2018	70 m	-			(common)
Animalia	Mollusca	Bivalvia	Adapedonta	Hiatellidae	Hiatella arctica	(Linnaeus, 1767)	1 m	-			1
Animalia	Mollusca	Bivalvia	Arcida	Arcidae	Arca noae	Linnaeus, 1758	20 m	-			1
Animalia	Mollusca	Bivalvia	Arcida	Arcidae	Barbatia barbata	(Linnaeus, 1758)	-	-			1
Animalia	Mollusca	Bivalvia	Arcida	Glycymerididae	Glycymeris bimaculata	(Poli, 1795)	18 m	-			1
Animalia	Mollusca	Bivalvia	Arcida	Noetiidae	Striarca lactea	(Linnaeus, 1758)	50 m	-			1
Animalia	Mollusca	Bivalvia	Cardiida	Cardiidae	Laevicardium crassum	(Gmelin, 1791)	18 m	-			1
Animalia	Mollusca	Bivalvia	Cardiida	Cardiidae	Papillicardium papillosum	(Poli, 1791)	10 m	-			1
Animalia	Mollusca	Bivalvia	Cardiida	Tellinidae	Moerella donacina	(Linnaeus, 1758)	18 m	-			3
Animalia	Mollusca	Bivalvia	Cardiida	Tellinidae	Peronaea planata	(Linnaeus, 1758)	18 m	-			1
Animalia	Mollusca	Bivalvia	Carditida	Carditidae	Cardita calyculata	(Linnaeus, 1758)	-	-			1
Animalia	Mollusca	Bivalvia	Galeommatida	Lasaeidae	Lasaea rubra	(Montagu, 1803)	-	-			1
Animalia	Mollusca	Bivalvia	Gastrochaenida	Gastrochaenidae	Rocellaria dubia	(Pennant, 1777)	2-5 m	-			(common)
Animalia	Mollusca	Bivalvia	Limida	Limidae	Lima lima	(Linnaeus, 1758)	4 m	-			1
Animalia	Mollusca	Bivalvia	Limida	Limidae	Limaria tuberculata	(Olivi, 1792)	5 m	-			1
Animalia	Mollusca	Bivalvia	Mytilida	Mytilidae	Lithophaga lithophaga	(Linnaeus, 1758)	2 m	-			(common)
Animalia	Mollusca	Bivalvia	Mytilida	Mytilidae	Musculus costulatus	(Risso, 1826)	-	-			1
Animalia	Mollusca	Bivalvia	Mytilida	Mytilidae	Mytilus galloprovincialis	Lamarck, 1819	1 m	-			1
Animalia	Mollusca	Bivalvia	Ostreida	Gryphaeidae	Neopycnodonte cochlear	(Poli, 1795)	4 m	-			2
Animalia	Mollusca	Bivalvia	Ostreida	Pinnidae	Pinna nobilis	Linnaeus, 1758	3-20 m	-			(common)
Animalia	Mollusca	Bivalvia	Ostreida	Pteriidae	Pteria hirundo	(Linnaeus, 1758)	50 m	-			1
Animalia	Mollusca	Bivalvia	Pectinida	Anomiidae	Anomia ephippium	Linnaeus, 1758	20 m	-			(common)
Animalia	Mollusca	Bivalvia	Pectinida	Pectinidae	Aequipecten opercularis	(Linnaeus, 1758)	20 m	-			2
Animalia	Mollusca	Bivalvia	Pectinida	Pectinidae	Manupecten pesfelis	(Linnaeus, 1758)	-	-			1
Animalia	Mollusca	Bivalvia	Pectinida	Pectinidae	Mimachlamys varia	(Linnaeus, 1758)	10 m	-			1
Animalia	Mollusca	Bivalvia	Pectinida	Pectinidae	Palliolum incomparabile	(Risso, 1826)	50 m	-			1
Animalia	Mollusca	Bivalvia	Pectinida	Pectinidae	Pecten jacobaeus	(Linnaeus, 1758)	-	-			1
Animalia	Mollusca	Bivalvia	Pectinida	Pectinidae	Talochlamys multistriata	(Poli, 1795)	-	-			1
Animalia	Mollusca	Bivalvia	Pectinida	Spondylidae	Spondylus gaederopus	Linnaeus, 1758	30 m	-			1
Animalia	Mollusca	Bivalvia	Venerida	Veneridae	Pitar mediterraneus	(Aradas & Benoit, 1872)	60 m	-			1
Animalia	Mollusca	Bivalvia	Venerida	Veneridae	Venus verrucosa	Linnaeus, 1758	-	-			1
Animalia	Mollusca	Cephalopoda	Myopsida	Loliginidae	Loligo vulgaris	Lamarck, 1798	30 m	-			1
Animalia	Mollusca	Cephalopoda	Octopoda	Octopodidae	Octopus vulgaris complex	Cuvier, 1797	2-30 m	-			1
Animalia	Mollusca	Cephalopoda	Sepiida	Sepiidae	Sepia officinalis	Linnaeus, 1758	5-30 m	-			(common)
Animalia	Mollusca	Gastropoda	[unassigned] Caenogastropoda	Cerithiidae	Bittium latreillii	(Payraudeau, 1826)	10 m	-			1
Animalia	Mollusca	Gastropoda	[unassigned] Caenogastropoda	Cerithiidae	Bittium reticulatum	(da Costa, 1778)	-	-			1
Animalia	Mollusca	Gastropoda	[unassigned] Caenogastropoda	Cerithiidae	Cerithium lividulum	Risso, 1826	1 m	-			1
Animalia	Mollusca	Gastropoda	[unassigned] Caenogastropoda	Cerithiidae	Cerithium renovatum complex	Monterosato, 1884	-	-			1
Animalia	Mollusca	Gastropoda	[unassigned] Caenogastropoda	Cerithiidae	Cerithium vulgatum complex	Bruguière, 1792	1 m	-			(common)
Animalia	Mollusca	Gastropoda	[unassigned] Caenogastropoda	Siliquariidae	Petalopoma elisabettae	Schiaparelli, 2002	40 m	-			1
Animalia	Mollusca	Gastropoda	Aplysiida	Aplysiidae	Aplysia depilans	Gmelin, 1791	2 m	Reproductive behaviour (IX)			1	Micaroni et al. 2018
Animalia	Mollusca	Gastropoda	Aplysiida	Aplysiidae	Aplysia fasciata	Poiret, 1789	3 m	Reproductive behaviour (VII)			1	Micaroni et al. 2018
Animalia	Mollusca	Gastropoda	Aplysiida	Aplysiidae	Aplysia punctata	(Cuvier, 1803)	10 m	Reproductive behaviour (II)			(uncommon)	Micaroni et al. 2018
Animalia	Mollusca	Gastropoda	Cephalaspidea	Aglajidae	Aglaja tricolorata	Renier, 1807	34 m	-			1	Micaroni et al. 2018
Animalia	Mollusca	Gastropoda	Cephalaspidea	Bullidae	Bulla striata	Bruguière, 1792	10 m	-			1	Micaroni et al. 2018
Animalia	Mollusca	Gastropoda	Cephalaspidea	Haminoeidae	Haminoea ind	Turton & Kingston [in Carrington], 1830	1-40 m	-			1	Micaroni et al. 2018
Animalia	Mollusca	Gastropoda	Cephalaspidea	Haminoeidae	Weinkauffia turgidula	(Forbes, 1844)	40 m	-			1	Micaroni et al. 2018
Animalia	Mollusca	Gastropoda	Lepetellida	Fissurellidae	Diodora graeca	(Linnaeus, 1758)	1 m	-			1
Animalia	Mollusca	Gastropoda	Lepetellida	Fissurellidae	Emarginula sicula	J.E. Gray, 1825	3 m	-			1
Animalia	Mollusca	Gastropoda	Lepetellida	Haliotidae	Haliotis tuberculata	Linnaeus, 1758	2-10 m	-			1
Animalia	Mollusca	Gastropoda	Lepetellida	Scissurellidae	Scissurella costata	d'Orbigny, 1824	-	-			1
Animalia	Mollusca	Gastropoda	Littorinimorpha	Aporrhaidae	Aporrhais pespelecani	(Linnaeus, 1758)	3 m	-			1
Animalia	Mollusca	Gastropoda	Littorinimorpha	Calyptraeidae	Calyptraea chinensis	(Linnaeus, 1758)	50 m	-			1
Animalia	Mollusca	Gastropoda	Littorinimorpha	Calyptraeidae	Crepidula moulinsii	Michaud, 1829	20 m	-			1
Animalia	Mollusca	Gastropoda	Littorinimorpha	Carinariidae	Carinaria lamarckii	Blainville, 1817	3 m	-			1
Animalia	Mollusca	Gastropoda	Littorinimorpha	Cassidae	Semicassis undulata	(Gmelin, 1791)	-	-			1
Animalia	Mollusca	Gastropoda	Littorinimorpha	Charoniidae	Charonia seguenzae	(Aradas & Benoit, 1872)	11 m	-			1
Animalia	Mollusca	Gastropoda	Littorinimorpha	Cymatiidae	Monoplex corrugatus	(Lamarck, 1816)	10 m	-			1
Animalia	Mollusca	Gastropoda	Littorinimorpha	Cypraeidae	Luria lurida lurida	(Linnaeus, 1758)	4 m	-			1
Animalia	Mollusca	Gastropoda	Littorinimorpha	Cypraeidae	Naria spurca spurca	(Linnaeus, 1758)	4 m	-			1
Animalia	Mollusca	Gastropoda	Littorinimorpha	Littorinidae	Melarhaphe neritoides	(Linnaeus, 1758)	0 m	Eggs (XI)			(common)
Animalia	Mollusca	Gastropoda	Littorinimorpha	Rissoidae	Alvania hirta	(Monterosato, 1884)	-	-			1
Animalia	Mollusca	Gastropoda	Littorinimorpha	Rissoidae	Alvania lineata	Risso, 1826	-	-			1
Animalia	Mollusca	Gastropoda	Littorinimorpha	Rissoidae	Alvania mamillata	Risso, 1826	-	-			1
Animalia	Mollusca	Gastropoda	Littorinimorpha	Rissoidae	Manzonia crassa	(Kanmacher, 1798)	-	-			1
Animalia	Mollusca	Gastropoda	Littorinimorpha	Rissoinidae	Rissoina bruguieri	(Payraudeau, 1826)	-	-			1
Animalia	Mollusca	Gastropoda	Littorinimorpha	Tonnidae	Tonna galea	(Linnaeus, 1758)	20-60 m	-			1
Animalia	Mollusca	Gastropoda	Littorinimorpha	Velutinidae	Lamellaria perspicua	(Linnaeus, 1758)	3 m	-			1
Animalia	Mollusca	Gastropoda	Littorinimorpha	Vermetidae	Dendropoma petraeum complex	(Monterosato, 1884)	-	-			1
Animalia	Mollusca	Gastropoda	Littorinimorpha	Vermetidae	Thylacodes arenarius	(Linnaeus, 1758)	70 m	-			1
Animalia	Mollusca	Gastropoda	Neogastropoda	Buccinidae	Euthria cornea	(Linnaeus, 1758)	-	-			1
Animalia	Mollusca	Gastropoda	Neogastropoda	Columbellidae	Columbella rustica	(Linnaeus, 1758)	1 m	-			(common)
Animalia	Mollusca	Gastropoda	Neogastropoda	Conidae	Conus ventricosus	Gmelin, 1791	2 m	-			(common)
Animalia	Mollusca	Gastropoda	Neogastropoda	Costellariidae	Pusia tricolor	(Gmelin, 1791)	4 m	-			1
Animalia	Mollusca	Gastropoda	Neogastropoda	Fasciolariidae	Fusinus fioritae	Russo & Pagli, 2019	40 m	-			1
Animalia	Mollusca	Gastropoda	Neogastropoda	Fasciolariidae	Tarantinaea lignaria	(Linnaeus, 1758)	1 m	-			1
Animalia	Mollusca	Gastropoda	Neogastropoda	Mitridae	Episcomitra zonata	(Marryat, 1818)	-	-			1
Animalia	Mollusca	Gastropoda	Neogastropoda	Mitridae	Isara cornea	(Lamarck, 1811)	-	-			1
Animalia	Mollusca	Gastropoda	Neogastropoda	Muricidae	Bolinus brandaris	(Linnaeus, 1758)	30 m	-			1
Animalia	Mollusca	Gastropoda	Neogastropoda	Muricidae	Hexaplex trunculus complex	(Linnaeus, 1758)	1-50 m	Eggs (VI-VII)			1
Animalia	Mollusca	Gastropoda	Neogastropoda	Muricidae	Hirtomurex squamosus	(Bivona e Bernardi, 1838)	50 m	-			1
Animalia	Mollusca	Gastropoda	Neogastropoda	Muricidae	Muricopsis cristata	(Brocchi, 1814)	30 m	-			1
Animalia	Mollusca	Gastropoda	Neogastropoda	Muricidae	Ocinebrina cf. corallina/aegeensis		40 m	-			1
Animalia	Mollusca	Gastropoda	Neogastropoda	Muricidae	Stramonita haemastoma	(Linnaeus, 1767)	0 m	-			1
Animalia	Mollusca	Gastropoda	Neogastropoda	Nassariidae	Tritia corniculum complex	(Olivi, 1792)	1 m	-			1
Animalia	Mollusca	Gastropoda	Neogastropoda	Nassariidae	Tritia incrassata complex	(Strøm, 1768)	1 m	-			1
Animalia	Mollusca	Gastropoda	Neogastropoda	Nassariidae	Tritia pellucida	(Risso, 1826)	5 m	-			1
Animalia	Mollusca	Gastropoda	Neogastropoda	Pisaniidae	Aplus dorbignyi complex	(Payraudeau, 1826)	-	-			1
Animalia	Mollusca	Gastropoda	Neogastropoda	Pisaniidae	Pisania striata	(Gmelin, 1791)	20 m	-			1
Animalia	Mollusca	Gastropoda	Nudibranchia	Aeolidiidae	Berghia coerulescens	(Laurillard, 1832)	1 m	-			1	Micaroni et al. 2018
Animalia	Mollusca	Gastropoda	Nudibranchia	Aeolidiidae	Spurilla neapolitana	(Delle Chiaje, 1841)	4 m	-			(common)	Micaroni et al. 2018
Animalia	Mollusca	Gastropoda	Nudibranchia	Calycidorididae	Diaphorodoris papillata	Portmann & Sandmeier, 1960	30 m	-	Ionian Sea		1	Micaroni et al. 2018
Animalia	Mollusca	Gastropoda	Nudibranchia	Chromodorididae	Felimare picta	(Philippi, 1836)	8-18 m	-			1	Micaroni et al. 2018
Animalia	Mollusca	Gastropoda	Nudibranchia	Chromodorididae	Felimare tricolor	(Cantraine, 1835)	14 m	-			1	Micaroni et al. 2018
Animalia	Mollusca	Gastropoda	Nudibranchia	Chromodorididae	Felimare villafranca	(Risso, 1818)	10 m	-			1	Micaroni et al. 2018
Animalia	Mollusca	Gastropoda	Nudibranchia	Chromodorididae	Felimida krohni	(Vérany, 1846)	40 m	-			1	Micaroni et al. 2018
Animalia	Mollusca	Gastropoda	Nudibranchia	Chromodorididae	Felimida luteorosea	(Rapp, 1827)	40 m	-			1	Micaroni et al. 2018
Animalia	Mollusca	Gastropoda	Nudibranchia	Dendrodorididae	Dendrodoris grandiflora	(Rapp, 1827)	4 m	-			1	Micaroni et al. 2018
Animalia	Mollusca	Gastropoda	Nudibranchia	Discodorididae	Peltodoris atromaculata	Bergh, 1880	18-30 m	Eggs (VI)			(common)	Micaroni et al. 2018
Animalia	Mollusca	Gastropoda	Nudibranchia	Discodorididae	Platydoris argo	(Linnaeus, 1767)	22 m	-			1	Micaroni et al. 2018
Animalia	Mollusca	Gastropoda	Nudibranchia	Dorididae	Doris ocelligera	(Bergh, 1881)	40 m	-	Ionian Sea		1	Micaroni et al. 2018
Animalia	Mollusca	Gastropoda	Nudibranchia	Dotidae	Doto acuta	Schmekel & Kress, 1977	2 m	-	Ionian Sea		30	Micaroni et al. 2018
Animalia	Mollusca	Gastropoda	Nudibranchia	Dotidae	Doto cf. koenneckeri	Lemche, 1976	2 m	-	Ionian Sea		5	Micaroni et al. 2018
Animalia	Mollusca	Gastropoda	Nudibranchia	Dotidae	Doto paulinae	Trinchese, 1881	2 m	-	Ionian Sea		1	Micaroni et al. 2018
Animalia	Mollusca	Gastropoda	Nudibranchia	Dotidae	Doto pygmaea	Bergh, 1871	0 m	Eggs (VII)	Ionian Sea		100+	Micaroni et al. 2018
Animalia	Mollusca	Gastropoda	Nudibranchia	Eubranchidae	Eubranchus exiguus	(Alder & Hancock, 1848)	0 m	-	Ionian Sea		1	Micaroni et al. 2018
Animalia	Mollusca	Gastropoda	Nudibranchia	Facelinidae	Cratena peregrina	(Gmelin, 1791)	21 - 25 m	-			1	Micaroni et al. 2018
Animalia	Mollusca	Gastropoda	Nudibranchia	Facelinidae	Facelina annulicornis	(Chamisso & Eysenhardt, 1821)	4 m	-	Ionian Sea		1	Micaroni et al. 2018
Animalia	Mollusca	Gastropoda	Nudibranchia	Fionidae	Fiona pinnata	(Eschscholtz, 1831)	0 m	Eggs (V)	Ionian Sea		1	Micaroni et al. 2018
Animalia	Mollusca	Gastropoda	Nudibranchia	Flabellinidae	Calmella cavolini	(Vérany, 1846)	1 m	-			1	Micaroni et al. 2018
Animalia	Mollusca	Gastropoda	Nudibranchia	Flabellinidae	Flabellina affinis	(Gmelin, 1791)	10 m	-			1	Micaroni et al. 2018
Animalia	Mollusca	Gastropoda	Nudibranchia	Onchidorididae	Onchidorididae ind	Gray, 1827	70 m	-			1	Micaroni et al. 2018
Animalia	Mollusca	Gastropoda	Nudibranchia	Phyllidiidae	Phyllidia flava	Aradas, 1847	23 m	-			1	Micaroni et al. 2018
Animalia	Mollusca	Gastropoda	Nudibranchia	Polyceridae	Kaloplocamus ramosus	(Cantraine, 1835)	70 m	-			1	Micaroni et al. 2018
Animalia	Mollusca	Gastropoda	Nudibranchia	Polyceridae	Polycera quadrilineata	(O. F. Müller, 1776)	40 m	-			1	Micaroni et al. 2018
Animalia	Mollusca	Gastropoda	Nudibranchia	Samlidae	Luisella babai	(Schmekel, 1972)	22 m	-			1	Micaroni et al. 2018
Animalia	Mollusca	Gastropoda	Nudibranchia	Trinchesiidae	Trinchesia caerulea	(Montagu, 1804)	2 m	-			1	Micaroni et al. 2018
Animalia	Mollusca	Gastropoda	Nudibranchia	Tritoniidae	Tritonia manicata	Deshayes, 1853	1 m	-			1	Micaroni et al. 2018
Animalia	Mollusca	Gastropoda	Pleurobranchida	Pleurobranchaeidae	Pleurobranchaea meckeli	(Blainville, 1825)	34 m	-			1	Micaroni et al. 2018
Animalia	Mollusca	Gastropoda	Runcinida	Runcinidae	Runcina adriatica	T. E. Thompson, 1980	20-39 m	-	Ionian Sea		1	Micaroni et al. 2018
Animalia	Mollusca	Gastropoda	Runcinida	Runcinidae	Runcina cf. brenkoae	T. E. Thompson, 1980	2 m	-	Ionian Sea		1	Micaroni et al. 2018
Animalia	Mollusca	Gastropoda	Runcinida	Runcinidae	Runcina cf. ornata	(Quatrefages, 1844)	20 m	-	Ionian Sea		1	Micaroni et al. 2018
Animalia	Mollusca	Gastropoda	Runcinida	Runcinidae	Runcina ferruginea	Kress, 1977	40 m	-			1	Micaroni et al. 2018
Animalia	Mollusca	Gastropoda	Trochida	Calliostomatidae	Calliostoma conulus	(Linnaeus, 1758)	4-60 m	-			2
Animalia	Mollusca	Gastropoda	Trochida	Colloniidae	Homalopoma sanguineum	(Linnaeus, 1758)	-	-			1
Animalia	Mollusca	Gastropoda	Trochida	Trochidae	Jujubinus exasperatus complex	(Pennant, 1777)	-	-			1
Animalia	Mollusca	Gastropoda	Trochida	Trochidae	Jujubinus striatus complex	(Linnaeus, 1758)	1 m	-			1
Animalia	Mollusca	Gastropoda	Trochida	Trochidae	Phorcus turbinatus	(Born, 1778)	0 m	-			1
Animalia	Mollusca	Gastropoda	Trochida	Trochidae	Steromphala nebulosa	(Philippi, 1849)	3 m	-			1
Animalia	Mollusca	Gastropoda	Trochida	Turbinidae	Bolma rugosa	(Linnaeus, 1767)	-	-			1
Animalia	Mollusca	Gastropoda	Umbraculida	Umbraculidae	Umbraculum umbraculum	([Lightfoot], 1786)	1-3 m	-			1	Micaroni et al. 2018
Animalia	Mollusca	Gastropoda		Limapontiidae	Ercolania viridis	(A. Costa, 1866)	0 m	-	Ionian Sea		1	Micaroni et al. 2018
Animalia	Mollusca	Gastropoda		Omalogyridae	Ammonicera fischeriana	(Monterosato, 1869)	-	-			1
Animalia	Mollusca	Gastropoda		Omalogyridae	Omalogyra cf. simplex	(Costa O. G., 1861)	-	-			1
Animalia	Mollusca	Gastropoda		Patellidae	Patella caerulea	Linnaeus, 1758	0 m	-			1
Animalia	Mollusca	Gastropoda		Patellidae	Patella rustica complex	Linnaeus, 1758	0 m	-			1
Animalia	Mollusca	Gastropoda		Plakobranchidae	Bosellia mimetica	Trinchese, 1891	21 m	Eggs (VI)			1	Micaroni et al. 2018
Animalia	Mollusca	Gastropoda		Plakobranchidae	Elysia timida	(Risso, 1818)	7 m	-			(common)	Micaroni et al. 2018
Animalia	Mollusca	Gastropoda		Plakobranchidae	Elysia viridis	(Montagu, 1804)	10 m	-			1	Micaroni et al. 2018
Animalia	Mollusca	Gastropoda		Plakobranchidae	Thuridilla hopei	(Vérany, 1853)	7 m	-			(common)	Micaroni et al. 2018
Animalia	Mollusca	Gastropoda		Pyramidellidae	Folinella excavata	(Phillippi, 1836)	-	-			1
Animalia	Mollusca	Polyplacophora	Chitonida	Acanthochitonidae	Acanthochitona fascicularis	(Linnaeus, 1767)	20 m	-			1
Animalia	Mollusca	Polyplacophora	Chitonida	Callochitonidae	Callochiton septemvalvis	(Montagu, 1803)	20 m	-			2
Animalia	Mollusca	Polyplacophora	Chitonida	Chitonidae	Rhyssoplax olivacea	(Spengler, 1797)	10 m	-			(common)
Animalia	Mollusca	Polyplacophora	Chitonida	Lepidochitonidae	Lepidochitona caprearum	(Scacchi, 1836)	1 m	Eggs (V)			1
Animalia	Nematoda	Chromadorea	Rhabditida	Anisakidae	Anisakis ind	Dujardin, 1845	-	-			1
Animalia	Nemertea	Hoplonemertea	Polystilifera	Drepanophoridae	Gibsonnemertes spectabilis	(Quatrefages, 1846)	70 m	-	Ionian Sea		1
Animalia	Nemertea	Pilidiophora	Heteronemertea	Lineidae	Notospermus geniculatus	(Delle Chiaje, 1828)	4 m	-			1
Animalia	Platyhelminthes	Monogenea	Mazocraeidea	Hexostomatidae	Hexostoma thynni	(Delaroche, 1811) Rafinesque, 1815	-	-			1
Animalia	Platyhelminthes		Polycladida	Euryleptidae	Prostheceraeus giesbrechtii	Lang, 1884	4-16 m	-	Strait of Messina		3
Animalia	Platyhelminthes		Polycladida	Planoceridae	Planocera ceratommata	(Palombi, 1936)	8 m	-	Ionian Sea		1
Animalia	Platyhelminthes		Polycladida	Pseudocerotidae	Pseudoceros maximus-type A	Lang, 1884	15 m	-	Ionian Sea		1
Animalia	Platyhelminthes		Polycladida	Pseudocerotidae	Pseudoceros velutinus	(Blanchard, 1847)	2 m	-	Ionian Sea		1
Animalia	Platyhelminthes		Polycladida	Pseudocerotidae	Thysanozoon brocchii	(Risso, 1818)	8 m	-	Ionian Sea		1
Animalia	Porifera	Calcarea	Clathrinida	Clathrinidae	Clathrina clathrus	(Schmidt, 1864)	40 m	-			(common)	Costa et al. 2019
Animalia	Porifera	Calcarea	Leucosolenida	Sycettidae	Sycon raphanus	Schmidt, 1862	70 m	-			(common)	Costa et al. 2019
Animalia	Porifera	Demospongiae	Agelasida	Agelasidae	Agelas oroides	(Schmidt, 1864)	20-42 m	-			(common)	Costa et al. 2019
Animalia	Porifera	Demospongiae	Agelasida	Hymerhabdiidae	Hymerhabdia oxytrunca	Topsent, 1904	20 m	-	Ionian Sea		-	Costa et al. 2019
Animalia	Porifera	Demospongiae	Agelasida	Hymerhabdiidae	Prosuberites longispinus	Topsent, 1893	20 m	-			-	Costa et al. 2019
Animalia	Porifera	Demospongiae	Axinellida	Axinellidae	Axinella cannabina	(Esper, 1794)	20-50 m	-			(common)	Costa et al. 2019
Animalia	Porifera	Demospongiae	Axinellida	Axinellidae	Axinella damicornis	(Esper, 1794)	20-35 m	-			(common)	Costa et al. 2019
Animalia	Porifera	Demospongiae	Axinellida	Axinellidae	Axinella polypoides	Schmidt, 1862	10 m	-			(common)	Costa et al. 2019
Animalia	Porifera	Demospongiae	Axinellida	Axinellidae	Axinella verrucosa	(Esper, 1794)	20-40 m	-			(common)	Costa et al. 2019
Animalia	Porifera	Demospongiae	Axinellida	Raspailiidae	Didiscus stylifer	Tsurnamal, 1969	20 m	-			-	Costa et al. 2019
Animalia	Porifera	Demospongiae	Axinellida	Raspailiidae	Eurypon cinctum	Sarà, 1960	20 m	-	Ionian Sea		-	Costa et al. 2019
Animalia	Porifera	Demospongiae	Axinellida	Raspailiidae	Eurypon clavatum	(Bowerbank, 1866)	20 m	-			-	Costa et al. 2019
Animalia	Porifera	Demospongiae	Axinellida	Raspailiidae	Eurypon coronula	(Bowerbank, 1874)	20 m	-	Ionian Sea		-	Costa et al. 2019
Animalia	Porifera	Demospongiae	Axinellida	Raspailiidae	Eurypon gracile	Bertolino, Calcinai & Pansini, 2013	20 m	-			-	Costa et al. 2019
Animalia	Porifera	Demospongiae	Axinellida	Raspailiidae	Eurypon major	Sarà & Siribelli, 1960	20 m	-			-	Costa et al. 2019
Animalia	Porifera	Demospongiae	Axinellida	Raspailiidae	Eurypon obtusum	Vacelet, 1969	20 m	-	Ionian Sea		-	Costa et al. 2019
Animalia	Porifera	Demospongiae	Axinellida	Raspailiidae	Eurypon viride	(Topsent, 1889)	20 m	-			-	Costa et al. 2019
Animalia	Porifera	Demospongiae	Axinellida	Raspailiidae	Raspaciona aculeata	(Johnston, 1842)	20 m	-			-	Costa et al. 2019
Animalia	Porifera	Demospongiae	Axinellida	Raspailiidae	Raspailia (Raspailia) viminalis	Schmidt, 1862	70 m	-	Ionian Sea		1	Costa et al. 2019
Animalia	Porifera	Demospongiae	Axinellida	Stelligeridae	Halicnemia geniculata	Sarà, 1958	20 m	-	Ionian Sea		-	Costa et al. 2019
Animalia	Porifera	Demospongiae	Biemnida	Rhabderemiidae	Rhabderemia gallica	van Soest & Hooper, 1993	20 m	-	Ionian Sea		-	Costa et al. 2019
Animalia	Porifera	Demospongiae	Biemnida	Rhabderemiidae	Rhabderemia minutula	(Carter, 1876)	20 m	-			-	Costa et al. 2019
Animalia	Porifera	Demospongiae	Bubarida	Bubaridae	Bubaris carcisis	Vacelet, 1969	20 m	-			-	Costa et al. 2019
Animalia	Porifera	Demospongiae	Bubarida	Bubaridae	Bubaris vermiculata	(Bowerbank, 1866)	20 m	-			-	Costa et al. 2019
Animalia	Porifera	Demospongiae	Bubarida	Bubaridae	Monocrepidium vermiculatum	Topsent, 1898	20 m	-	Ionian Sea		-	Costa et al. 2019
Animalia	Porifera	Demospongiae	Bubarida	Bubaridae	Rhabdobaris implicata	Pulitzer-Finali, 1983	20 m	-	Ionian Sea		-	Costa et al. 2019
Animalia	Porifera	Demospongiae	Bubarida	Desmanthidae	Desmanthus incrustans	(Topsent, 1889)	20 m	-			-	Costa et al. 2019
Animalia	Porifera	Demospongiae	Bubarida	Dictyonellidae	Acanthella acuta	Schmidt, 1862	25-30 m	-			(common)	Costa et al. 2019
Animalia	Porifera	Demospongiae	Bubarida	Dictyonellidae	Dictyonella incisa	(Schmidt, 1880)	10 m	-			1	Costa et al. 2019
Animalia	Porifera	Demospongiae	Bubarida	Dictyonellidae	Dictyonella obtusa	(Schmidt, 1862)	22 m	-			1	Costa et al. 2019
Animalia	Porifera	Demospongiae	Chondrillida	Chondrillidae	Chondrilla nucula	Schmidt, 1862	5-25 m	-			(common)	Costa et al. 2019
Animalia	Porifera	Demospongiae	Chondrosiida	Chondrosiidae	Chondrosia reniformis	Nardo, 1847	2-20 m	Spawning (VII)			(common)	Costa et al. 2019
Animalia	Porifera	Demospongiae	Clionaida	Clionaidae	Cliona amplicavata	Rützler, 1974	20 m	-	Ionian Sea		-	Costa et al. 2019
Animalia	Porifera	Demospongiae	Clionaida	Clionaidae	Cliona burtoni	Topsent, 1932	20 m	-	Ionian Sea		-	Costa et al. 2019
Animalia	Porifera	Demospongiae	Clionaida	Clionaidae	Cliona celata	Grant, 1826	5 m	-			(common)	Costa et al. 2019
Animalia	Porifera	Demospongiae	Clionaida	Clionaidae	Cliona schmidtii	(Ridley, 1881)	10 m	-			(common)	Costa et al. 2019
Animalia	Porifera	Demospongiae	Clionaida	Clionaidae	Cliona viridis	(Schmidt, 1862)	5-20 m	-			-	Costa et al. 2019
Animalia	Porifera	Demospongiae	Clionaida	Clionaidae	Cliothosa hancocki	(Topsent, 1888)	20 m	-			-	Costa et al. 2019
Animalia	Porifera	Demospongiae	Clionaida	Clionaidae	Spiroxya heteroclita	Topsent, 1896	20 m	-			-	Costa et al. 2019
Animalia	Porifera	Demospongiae	Clionaida	Clionaidae	Spiroxya sarai	(Melone, 1965)	20 m	-			-	Costa et al. 2019
Animalia	Porifera	Demospongiae	Clionaida	Spirastrellidae	Diplastrella bistellata	(Schmidt, 1862)	20 m	-			-	Costa et al. 2019
Animalia	Porifera	Demospongiae	Clionaida	Spirastrellidae	Diplastrella boeroi	Bertolino, Costa & Pansini, 2019	20 m	-	New for science		-	Costa et al. 2019
Animalia	Porifera	Demospongiae	Clionaida	Spirastrellidae	Spirastrella cunctatrix	Schmidt, 1868	20 m	-			-	Costa et al. 2019
Animalia	Porifera	Demospongiae	Clionaida	Spirastrellidae	Spirastrella regina	Bertolino, Costa & Pansini, 2020	20 m	-	New for science		-	Costa et al. 2019
Animalia	Porifera	Demospongiae	Dictyoceratida	Dysideidae	Dysidea avara	(Schmidt, 1862)	20 m	-			-	Costa et al. 2019
Animalia	Porifera	Demospongiae	Dictyoceratida	Dysideidae	Dysidea fragilis	(Montagu, 1814)	20 m	-			-	Costa et al. 2019
Animalia	Porifera	Demospongiae	Dictyoceratida	Irciniidae	Ircinia variabilis	(Schmidt, 1862)	10 m	-			(common)	Costa et al. 2019
Animalia	Porifera	Demospongiae	Dictyoceratida	Irciniidae	Sarcotragus foetidus	Schmidt, 1862	5-10 m	-			1	Costa et al. 2019
Animalia	Porifera	Demospongiae	Dictyoceratida	Irciniidae	Sarcotragus spinosulus	Schmidt, 1862	12 m	-			(common)	Costa et al. 2019
Animalia	Porifera	Demospongiae	Dictyoceratida	Thorectidae	Fasciospongia cavernosa	(Schmidt, 1862)	5-20 m	-			-	Costa et al. 2019
Animalia	Porifera	Demospongiae	Dictyoceratida	Thorectidae	Scalarispongia scalaris	(Schmidt, 1862)	10 m	-			-	Costa et al. 2019
Animalia	Porifera	Demospongiae	Haplosclerida	Chalinidae	Haliclona (Reniera) mediterranea	Griessinger, 1971	5 m	-			-	Costa et al. 2019
Animalia	Porifera	Demospongiae	Haplosclerida	Chalinidae	Haliclona (Rhizoniera) sarai	(Pulitzer-Finali, 1969)	5 m	-			-	Costa et al. 2019
Animalia	Porifera	Demospongiae	Haplosclerida	Chalinidae	Haliclona (Soestella) mucosa	(Griessinger, 1971)	7 m	-	Ionian Sea		-	Costa et al. 2019
Animalia	Porifera	Demospongiae	Haplosclerida	Chalinidae	Haliclona (Soestella) valliculata	(Griessinger, 1971)	5 m	-	Ionian Sea		-	Costa et al. 2019
Animalia	Porifera	Demospongiae	Haplosclerida	Petrosiidae	Petrosia (Petrosia) clavata	(Esper, 1794)	20 m	-			-	Costa et al. 2019
Animalia	Porifera	Demospongiae	Haplosclerida	Petrosiidae	Petrosia (Petrosia) ficiformis	(Poiret, 1789)	7-40 m	-			(common)	Costa et al. 2019
Animalia	Porifera	Demospongiae	Haplosclerida	Petrosiidae	Petrosia (Strongylophora) pulitzeri	Pansini, 1996	7 m	-	Ionian Sea		-	Costa et al. 2019
Animalia	Porifera	Demospongiae	Haplosclerida	Petrosiidae	Petrosia (Strongylophora) vansoesti	Boury-Esnault, Pansini & Uriz, 1994	5 m	-	Ionian Sea		-	Costa et al. 2019
Animalia	Porifera	Demospongiae	Haplosclerida	Phloeodictyidae	Oceanapia perforata	(Sarà, 1960)	7 m	-	Ionian Sea		-	Costa et al. 2019
Animalia	Porifera	Demospongiae	Poecilosclerida	Coelosphaeridae	Lissodendoryx (Anomodoryx) cavernosa	(Topsent, 1892)	20 m	-			-	Costa et al. 2019
Animalia	Porifera	Demospongiae	Poecilosclerida	Crambeidae	Crambe crambe	(Schmidt, 1862)	5 m	-			(common)	Costa et al. 2019
Animalia	Porifera	Demospongiae	Poecilosclerida	Crellidae	Crella sp.	Gray, 1867	20 m	-			-	Costa et al. 2019
Animalia	Porifera	Demospongiae	Poecilosclerida	Esperiopsidae	Ulosa digitata	(Schmidt, 1866)	10 m	-			-	Costa et al. 2019
Animalia	Porifera	Demospongiae	Poecilosclerida	Hymedesmiidae	Hamigera hamigera	(Schmidt, 1862)	3 m	-			1	Costa et al. 2019
Animalia	Porifera	Demospongiae	Poecilosclerida	Hymedesmiidae	Hemimycale columella	(Bowerbank, 1874)	6 m	-			1	Costa et al. 2019
Animalia	Porifera	Demospongiae	Poecilosclerida	Hymedesmiidae	Phorbas dives	(Topsent, 1891)	20 m	-			-	Costa et al. 2019
Animalia	Porifera	Demospongiae	Poecilosclerida	Hymedesmiidae	Phorbas fictitius	(Bowerbank, 1866)	20 m	-			-	Costa et al. 2019
Animalia	Porifera	Demospongiae	Poecilosclerida	Hymedesmiidae	Phorbas tenacior	(Topsent, 1925)	20 m	-			-	Costa et al. 2019
Animalia	Porifera	Demospongiae	Poecilosclerida	Microcionidae	Clathria (Clathria) coralloides	(Scopoli, 1772)	70 m	-			1	Costa et al. 2019
Animalia	Porifera	Demospongiae	Poecilosclerida	Microcionidae	Clathria (Clathria) toxistricta	Topsent, 1925	70 m	-			1	Costa et al. 2019
Animalia	Porifera	Demospongiae	Poecilosclerida	Microcionidae	Clathria (Clathria) toxivaria	(Sarà, 1959)	20 m	-			-	Costa et al. 2019
Animalia	Porifera	Demospongiae	Poecilosclerida	Mycalidae	Mycale (Mycale) lingua	(Bowerbank, 1866)	20 m	-			-	Costa et al. 2019
Animalia	Porifera	Demospongiae	Poecilosclerida	Mycalidae	Mycale (Mycale) massa	(Schmidt, 1862)	20 m	-			-	Costa et al. 2019
Animalia	Porifera	Demospongiae	Suberitida	Halichondriidae	Axinyssa aurantiaca	(Schmidt, 1864)	20 m	-			-	Costa et al. 2019
Animalia	Porifera	Demospongiae	Suberitida	Halichondriidae	Halichondria (Halichondria) cf. panicea	(Pallas, 1766)	20 m	-			-	Costa et al. 2019
Animalia	Porifera	Demospongiae	Suberitida	Halichondriidae	Halichondria (Halichondria) contorta	(Sarà, 1961)	10 m	-	Ionian Sea		-	Costa et al. 2019
Animalia	Porifera	Demospongiae	Suberitida	Halichondriidae	Spongosorites intricatus	(Topsent, 1892)	20 m	-			-	Costa et al. 2019
Animalia	Porifera	Demospongiae	Suberitida	Suberitidae	Aaptos aaptos	(Schmidt, 1864)	4-10 m	-			(common)	Costa et al. 2019
Animalia	Porifera	Demospongiae	Suberitida	Suberitidae	Protosuberites epiphytum	(Lamarck, 1815)	20 m	-			-	Costa et al. 2019
Animalia	Porifera	Demospongiae	Suberitida	Suberitidae	Terpios gelatinosus	(Bowerbank, 1866)	20 m	-			1	Costa et al. 2019
Animalia	Porifera	Demospongiae	Tethyida	Tethyidae	Tethya aurantium	(Pallas, 1766)	20 m	-			-	Costa et al. 2019
Animalia	Porifera	Demospongiae	Tethyida	Tethyidae	Tethya citrina	Sarà & Melone, 1965	20 m	-			-	Costa et al. 2019
Animalia	Porifera	Demospongiae	Tethyida	Timeidae	Timea stellata	(Bowerbank, 1866)	20 m	-			-	Costa et al. 2019
Animalia	Porifera	Demospongiae	Tethyida	Timeidae	Timea unistellata	(Topsent, 1892)	20 m	-			-	Costa et al. 2019
Animalia	Porifera	Demospongiae	Tetractinellida	Ancorinidae	Ancorina cerebrum	Schmidt, 1862	20 m	-	Ionian Sea		-	Costa et al. 2019
Animalia	Porifera	Demospongiae	Tetractinellida	Ancorinidae	Dercitus (Stoeba) plicatus	(Schmidt, 1868)	20 m	-			-	Costa et al. 2019
Animalia	Porifera	Demospongiae	Tetractinellida	Ancorinidae	Jaspis incrustans	(Topsent, 1890)	20 m	-			-	Costa et al. 2019
Animalia	Porifera	Demospongiae	Tetractinellida	Ancorinidae	Jaspis johnstonii	(Schmidt, 1862)	20 m	-			-	Costa et al. 2019
Animalia	Porifera	Demospongiae	Tetractinellida	Ancorinidae	Stelletta grubii	Schmidt, 1862	20 m	-			-	Costa et al. 2019
Animalia	Porifera	Demospongiae	Tetractinellida	Ancorinidae	Stelletta mediterranea	(Topsent, 1893)	20 m	-	Ionian Sea		-	Costa et al. 2019
Animalia	Porifera	Demospongiae	Tetractinellida	Ancorinidae	Stelletta stellata	Topsent, 1893	20 m	-			-	Costa et al. 2019
Animalia	Porifera	Demospongiae	Tetractinellida	Calthropellidae	Calthropella (Corticellopsis) stelligera	(Schmidt, 1868)	-	-	Ionian Sea		1	Costa et al. 2019
Animalia	Porifera	Demospongiae	Tetractinellida	Geodiidae	Erylus discophorus	(Schmidt, 1862)	20 m	-			-	Costa et al. 2019
Animalia	Porifera	Demospongiae	Tetractinellida	Geodiidae	Geodia cydonium	(Linnaeus, 1767)	20 m	-			-	Costa et al. 2019
Animalia	Porifera	Demospongiae	Tetractinellida	Geodiidae	Penares euastrum	(Schmidt, 1868)	20 m	-			-	Costa et al. 2019
Animalia	Porifera	Demospongiae	Tetractinellida	Geodiidae	Penares helleri	(Schmidt, 1864)	20 m	-			-	Costa et al. 2019
Animalia	Porifera	Demospongiae	Tetractinellida	Pachastrellidae	Pachastrella monilifera	Schmidt, 1868	20 m	-			-	Costa et al. 2019
Animalia	Porifera	Demospongiae	Tetractinellida	Pachastrellidae	Triptolemma simplex	(Sarà, 1959)	20 m	-			-	Costa et al. 2019
Animalia	Porifera	Demospongiae	Tetractinellida	Tetillidae	Tetilla sp.	Schmidt, 1868	20 m	-			-	Costa et al. 2019
Animalia	Porifera	Demospongiae	Tetractinellida	Thoosidae	Alectona millari	Carter, 1879	20 m	-			-	Costa et al. 2019
Animalia	Porifera	Demospongiae	Tetractinellida	Thoosidae	Delectona madreporica	Bavestrello, Calcinai, Cerrano & Sarà, 1997	20 m	-	Ionian Sea		-	Costa et al. 2019
Animalia	Porifera	Demospongiae	Tetractinellida	Vulcanellidae	Poecillastra compressa	(Bowerbank, 1866)	20 m	-			-	Costa et al. 2019
Animalia	Porifera	Demospongiae	Verongiida	Aplysinidae	Aplysina aerophoba	(Nardo, 1833)	20 m	-			-	Costa et al. 2019
Animalia	Porifera	Demospongiae	Verongiida	Aplysinidae	Aplysina cavernicola	(Vacelet, 1959)	70 m	-			1	Costa et al. 2019
Animalia	Porifera	Demospongiae	Verongiida	Ianthellidae	Hexadella racovitzai	Topsent, 1896	15 m	-			1	Costa et al. 2019
Animalia	Porifera	Homoscleromorpha	Homosclerophorida	Oscarellidae	Oscarella cf. tuberculata	(Schmidt, 1868)	5-15 m	-	Ionian Sea		1	Costa et al. 2019
Animalia	Porifera	Homoscleromorpha	Homosclerophorida	Plakinidae	Corticium candelabrum	Schmidt, 1862	20 m	-			-	Costa et al. 2019
Animalia	Porifera	Homoscleromorpha	Homosclerophorida	Plakinidae	Plakina dilopha	Schulze, 1880	20 m	-	Ionian Sea		-	Costa et al. 2019
Animalia	Porifera	Homoscleromorpha	Homosclerophorida	Plakinidae	Plakina reducta	(Pulitzer-Finali, 1983)	20 m	-			-	Costa et al. 2019
Animalia	Porifera	Homoscleromorpha	Homosclerophorida	Plakinidae	Plakina trilopha	Schulze, 1880	20 m	-			-	Costa et al. 2019
Animalia	Porifera	Homoscleromorpha	Homosclerophorida	Plakinidae	Plakortis simplex	Schulze, 1880	20 m	-			-	Costa et al. 2019
Bacteria	Cyanobacteria	Cyanophyceae	Nostocales	Rivulariaceae	Rivularia ind	Roth ex Bornet & Flahault, 1886	0 m	-			(common)
Chromista	Ciliophora	Heterotrichea	Heterotrichida	Folliculinidae	Folliculinidae ind	(T.S. Wright, 1859) Dons, 1934	70 m	-			x
Chromista	Ciliophora	Oligohymenophorea	Sessilida	Zoothamniidae	Zoothamnium niveum	Ehrenberg, 1838	10 m	-	Ionian Sea		1, (rare)
Chromista	Foraminifera	Globothalamea	Rotaliida	Homotrematidae	Miniacina miniacea	(Pallas, 1766)	30 m	-			x
Chromista	Foraminifera	Globothalamea	Textulariida	Textulariidae	Textularia ind	Defrance, 1824	25 m	-			1
Chromista	Ochrophyta	Phaeophyceae	Cutleriales	Cutleriaceae	Cutleria multifida	(Turner) Greville	1 m	-			1
Chromista	Ochrophyta	Phaeophyceae	Cutleriales	Cutleriaceae	Zanardinia typus	(Nardo) P.C.Silva	5 m	-			1
Chromista	Ochrophyta	Phaeophyceae	Dictyotales	Dictyotaceae	Dictyopteris polypodioides	(A.P.De Candolle) J.V.Lamouroux	1 m	-			1
Chromista	Ochrophyta	Phaeophyceae	Dictyotales	Dictyotaceae	Dictyota cf. implexa	(Desfontaines) J.V.Lamouroux	20 m	-			1
Chromista	Ochrophyta	Phaeophyceae	Dictyotales	Dictyotaceae	Dictyota dichotoma	(Hudson) J.V.Lamouroux	0-15 m	-			x
Chromista	Ochrophyta	Phaeophyceae	Dictyotales	Dictyotaceae	Padina pavonica	(Linnaeus) Thivy	1-10 m	-			x
Chromista	Ochrophyta	Phaeophyceae	Ectocarpales	Scytosiphonaceae	Colpomenia sinuosa	(Mertens ex Roth) Derbès & Solier	10 m	-			x
Chromista	Ochrophyta	Phaeophyceae	Ectocarpales	Scytosiphonaceae	Scytosiphon lomentaria	(Lyngbye) Link	1 m	-			1
Chromista	Ochrophyta	Phaeophyceae	Fucales	Sargassaceae	Cystoseira compressa	(Esper) Gerloff & Nizamuddin	1 m	-			x
Chromista	Ochrophyta	Phaeophyceae	Fucales	Sargassaceae	Cystoseira foeniculacea	(Linnaeus) Greville	20 m	-			1, (rare)
Chromista	Ochrophyta	Phaeophyceae	Fucales	Sargassaceae	Ericaria amentacea	(C.Agardh) Molinari & Guiry	0-1 m	-			x
Chromista	Ochrophyta	Phaeophyceae	Fucales	Sargassaceae	Sargassum vulgare	C.Agardh	10 m	-			1, (rare)
Chromista	Ochrophyta	Phaeophyceae	Sphacelariales	Cladostephaceae	Cladostephus hirsutus	(Linnaeus) Boudouresque & M.Perret-Boudouresque ex Heesch & al.	3 m	-			1
Chromista	Ochrophyta	Phaeophyceae	Sphacelariales	Sphacelariaceae	Sphacelaria sp.	Lyngbye	20 m	-			1
Chromista	Ochrophyta	Phaeophyceae	Sphacelariales	Stypocaulaceae	Halopteris scoparia	(Linnaeus) Sauvageau	10 m	-			x
Chromista	Ochrophyta	Phaeophyceae	Sporochnales	Sporochnaceae	Nereia filiformis	(J.Agardh) Zanardini	40 m	-			1
Chromista	Radiozoa	Polycystina	Collodaria		Collozoum ind	Haeckel, 1862 sensu Brandt, 1905	0-5 m	Occurrence (VI-VII)			x
Plantae	Chlorophyta	Pyramimonadophyceae	Palmophyllales	Palmophyllaceae	Palmophyllum crassum	(Naccari) Rabenhorst	4 m	-			1
Plantae	Chlorophyta	Ulvophyceae	Bryopsidales	Bryopsidaceae	Bryopsis cf. pennata	J.V.Lamouroux	1 m	-			1
Plantae	Chlorophyta	Ulvophyceae	Bryopsidales	Bryopsidaceae	Bryopsis cupressina	J.V.Lamouroux	0 m	-			1
Plantae	Chlorophyta	Ulvophyceae	Bryopsidales	Caulerpaceae	Caulerpa cylindracea	Sonder	8-45 m	-		TRUE	x
Plantae	Chlorophyta	Ulvophyceae	Bryopsidales	Caulerpaceae	Caulerpa prolifera	(Forsskål) J.V.Lamouroux	15 m	-			1
Plantae	Chlorophyta	Ulvophyceae	Bryopsidales	Codiaceae	Codium bursa	(Olivi) C.Agardh	8 m	-			1
Plantae	Chlorophyta	Ulvophyceae	Bryopsidales	Codiaceae	Codium cf. vermilara	(Olivi) Delle Chiaje	5-10 m	-			2
Plantae	Chlorophyta	Ulvophyceae	Bryopsidales	Codiaceae	Codium coralloides	(Kützing) P.C.Silva	8-10 m	-			3
Plantae	Chlorophyta	Ulvophyceae	Bryopsidales	Halimedaceae	Halimeda tuna	(J.Ellis & Solander) J.V.Lamouroux	10-25 m	-			x
Plantae	Chlorophyta	Ulvophyceae	Bryopsidales	Udoteaceae	Flabellia petiolata	(Turra) Nizamuddin	10-15 m	-			x
Plantae	Chlorophyta	Ulvophyceae	Bryopsidales	Udoteaceae	Pseudochlorodesmis furcellata	(Zanardini) Børgesen	3 m	-			1
Plantae	Chlorophyta	Ulvophyceae	Cladophorales	Anadyomenaceae	Anadyomene stellata	(Wulfen) C.Agardh	1-20 m	-			(common)
Plantae	Chlorophyta	Ulvophyceae	Cladophorales	Cladophoraceae	Chaetomorpha linum	(O.F.Müller) Kützing	0 m	-			1
Plantae	Chlorophyta	Ulvophyceae	Cladophorales	Cladophoraceae	Cladophora dalmatica	Kützing	0 m	-			1
Plantae	Chlorophyta	Ulvophyceae	Cladophorales	Cladophoraceae	Cladophora laetevirens	(Dillwyn) Kützing	0 m	-			1
Plantae	Chlorophyta	Ulvophyceae	Cladophorales	Valoniaceae	Valonia utricularis	(Roth) C.Agardh	2 m	-			1
Plantae	Chlorophyta	Ulvophyceae	Dasycladales	Polyphysaceae	Acetabularia acetabulum	(Linnaeus) P.C.Silva	3-10 m	-			(common)
Plantae	Chlorophyta	Ulvophyceae	Ulvales	Ulvaceae	Ulva linza	Linnaeus	0 m	-			1
Plantae	Rhodophyta	Compsopogonophyceae	Erythropeltales	Erythrotrichiaceae	Erythrotrichia carnea	(Dillwyn) J.Agardh	0 m	-			1
Plantae	Rhodophyta	Florideophyceae	Bonnemaisoniales	Bonnemaisoniaceae	Asparagopsis taxiformis	(Delile) Trevisan de Saint-Léon	1 m	-			(common)
Plantae	Rhodophyta	Florideophyceae	Ceramiales	Callithamniaceae	Callithamnion granulatum	(Ducluzeau) C.Agardh	0 m	-			1
Plantae	Rhodophyta	Florideophyceae	Ceramiales	Callithamniaceae	Crouania attenuata	(C.Agardh) J.Agardh	10 m	-			1
Plantae	Rhodophyta	Florideophyceae	Ceramiales	Ceramiaceae	Ceramium cf. virgatum	Roth	0 m	-			1
Plantae	Rhodophyta	Florideophyceae	Ceramiales	Ceramiaceae	Ceramium diaphanum	(Lightfoot) Roth	0 m	-			1
Plantae	Rhodophyta	Florideophyceae	Ceramiales	Ceramiaceae	Gayliella mazoyerae	T.O.Cho, Fredericq & Hommersand	2 m	-			1
Plantae	Rhodophyta	Florideophyceae	Ceramiales	Dasyaceae	Dasya rigidula	(Kützing) Ardissone	20 m	-			1
Plantae	Rhodophyta	Florideophyceae	Ceramiales	Delesseriaceae	Hypoglossum hypoglossoides	(Stackhouse) Collins & Hervey	1 m	-			1
Plantae	Rhodophyta	Florideophyceae	Ceramiales	Rhodomelaceae	Chondria sp.	(Montagne) Harvey	0 m	-			1
Plantae	Rhodophyta	Florideophyceae	Ceramiales	Rhodomelaceae	Herposiphonia secunda	(C.Agardh) Ambronn	20 m	-			1
Plantae	Rhodophyta	Florideophyceae	Ceramiales	Rhodomelaceae	Laurencia cf. microcladia	Kützing	20 m	-			1
Plantae	Rhodophyta	Florideophyceae	Ceramiales	Rhodomelaceae	Laurencia cf. obtusa	(Hudson) J.V.Lamouroux	1 m	-			1
Plantae	Rhodophyta	Florideophyceae	Ceramiales	Rhodomelaceae	Laurencia glandulifera	(Kützing) Kützing	1 m	-			1
Plantae	Rhodophyta	Florideophyceae	Ceramiales	Rhodomelaceae	Osmundaria volubilis	(Linnaeus) R.E.Norris	30 m	-			1
Plantae	Rhodophyta	Florideophyceae	Ceramiales	Rhodomelaceae	Osmundea truncata	(Kützing) K.W.Nam & Maggs	0 m	-			1
Plantae	Rhodophyta	Florideophyceae	Ceramiales	Rhodomelaceae	Palisada perforata	(Bory) K.W.Nam	2 m	-			1
Plantae	Rhodophyta	Florideophyceae	Ceramiales	Rhodomelaceae	Polysiphonia opaca	(C.Agardh) Moris & De Notaris	0 m	-			1
Plantae	Rhodophyta	Florideophyceae	Ceramiales	Rhodomelaceae	Polysiphonia sertularioides	(Grateloup) J.Agardh	0 m	-			1
Plantae	Rhodophyta	Florideophyceae	Ceramiales	Rhodomelaceae	Vertebrata fruticulosa	(Wulfen) Kuntze	1 m	Reproductive structures (IV)			1
Plantae	Rhodophyta	Florideophyceae	Ceramiales	Rhodomelaceae	Xiphosiphonia pennata	(C.Agardh) Savoie & G.W.Saunders	0 m	-			1
Plantae	Rhodophyta	Florideophyceae	Ceramiales	Wrangeliaceae	Wrangelia penicillata	(C.Agardh) C.Agardh	10 m	-			x
Plantae	Rhodophyta	Florideophyceae	Corallinales	Corallinaceae	Ellisolandia elongata	(J.Ellis & Solander) K.R.Hind & G.W.Saunders	0-1 m	-			x
Plantae	Rhodophyta	Florideophyceae	Corallinales	Corallinaceae	Jania rubens	(Linnaeus) J.V.Lamouroux	2 m	-			1
Plantae	Rhodophyta	Florideophyceae	Corallinales	Corallinaceae	Jania virgata	(Zanardini) Montagne	10-18 m	-			x
Plantae	Rhodophyta	Florideophyceae	Corallinales	Lithophyllaceae	Amphiroa rigida	J.V.Lamouroux	2 m	-			(common)
Plantae	Rhodophyta	Florideophyceae	Corallinales	Lithophyllaceae	Lithophyllum byssoides	(Lamarck) Foslie	0 m	-			1
Plantae	Rhodophyta	Florideophyceae	Corallinales	Lithophyllaceae	Lithophyllum cf. incrustans	Philippi	3 m	-			1
Plantae	Rhodophyta	Florideophyceae	Corallinales	Lithophyllaceae	Lithophyllum stictiforme	(J.E. Areschoug) Hauck	5-10 m	-			1
Plantae	Rhodophyta	Florideophyceae	Corallinales	Lithophyllaceae	Tenarea tortuosa	(Esper) Me.Lemoine	1 m	-			x
Plantae	Rhodophyta	Florideophyceae	Corallinales	Lithophyllaceae	Titanoderma trochanter	(Bory) Benhissoune, Boudouresque, Perret-Boudouresque & Verlaque	1 m	-			1
Plantae	Rhodophyta	Florideophyceae	Corallinales	Mastoporaceae	Pneophyllum fragile	Kützing	0 m	-			1
Plantae	Rhodophyta	Florideophyceae	Gelidiales	Gelidiaceae	Gelidium spinosum	(S.G.Gmelin) P.C.Silva	1 m	-			1
Plantae	Rhodophyta	Florideophyceae	Gelidiales	Pterocladiaceae	Pterocladiella capillacea	(S.G.Gmelin) Santelices & Hommersand	0 m	-			1
Plantae	Rhodophyta	Florideophyceae	Gigartinales	Cystocloniaceae	Hypnea musciformis	(Wulfen) J.V.Lamouroux	2 m	-			2
Plantae	Rhodophyta	Florideophyceae	Gigartinales	Gigartinaceae	Chondracanthus acicularis	(Roth) Fredericq	0 m	-			1
Plantae	Rhodophyta	Florideophyceae	Gigartinales	Phyllophoraceae	Phyllophora crispa	(Hudson) P.S.Dixon	30 m	-			1
Plantae	Rhodophyta	Florideophyceae	Gigartinales	Phyllophoraceae	Schottera nicaeensis	(J.V.Lamouroux ex Duby) Guiry & Hollenberg	1 m	-			1
Plantae	Rhodophyta	Florideophyceae	Gigartinales	Rhizophyllidaceae	Contarinia squamariae	(Meneghini) Denizot	5 m	-			1
Plantae	Rhodophyta	Florideophyceae	Gigartinales	Sphaerococcaceae	Sphaerococcus coronopifolius	Stackhouse	7-10 m	-			1
Plantae	Rhodophyta	Florideophyceae	Halymeniales	Halymeniaceae	Halymenia floresii	(Clemente) C.Agardh	15 m	-			1
Plantae	Rhodophyta	Florideophyceae	Nemaliales	Galaxauraceae	Tricleocarpa fragilis	(Linnaeus) Huisman & R.A.Townsend	10 m	-			1
Plantae	Rhodophyta	Florideophyceae	Nemaliales	Liagoraceae	Liagora viscida	(Forsskål) C.Agardh	0-2 m	-			1
Plantae	Rhodophyta	Florideophyceae	Nemastomatales	Nemastomataceae	Predaea ollivieri	Feldmann	22 m	-			1
Plantae	Rhodophyta	Florideophyceae	Nemastomatales	Schizymeniaceae	Platoma cyclocolpum	(Montagne) F.Schmitz	3 m	Reproductive structures (VIII)			1
Plantae	Rhodophyta	Florideophyceae	Peyssonneliales	Peyssonneliaceae	Peyssonnelia heteromorpha	(Zanardini) Athanasiadis	10 m	-			1
Plantae	Rhodophyta	Florideophyceae	Peyssonneliales	Peyssonneliaceae	Peyssonnelia rosa-marina	Boudouresque & Denizot	20 m	-			1
Plantae	Rhodophyta	Florideophyceae	Peyssonneliales	Peyssonneliaceae	Peyssonnelia rubra	(Greville) J.Agardh	0 m	-			1
Plantae	Rhodophyta	Florideophyceae	Peyssonneliales	Peyssonneliaceae	Peyssonnelia squamaria	(S.G.Gmelin) Decaisne ex J.Agardh	5-20 m	-			x
Plantae	Rhodophyta	Florideophyceae	Rhodymeniales	Champiaceae	Gastroclonium clavatum	(Roth) Ardissone	1 m	-			1
Plantae	Rhodophyta	Florideophyceae	Rhodymeniales	Rhodymeniaceae	Botryocladia sp.	(J.Agardh) Kylin	30 m	-			1
Plantae	Rhodophyta	Florideophyceae	Rhodymeniales	Rhodymeniaceae	Irvinea boergesenii	(Feldmann) R.J.Wilkes, L.M.McIvor & Guiry	30 m	-			1
Plantae	Tracheophyta	Magnoliopsida	Alismatales	Cymodoceaceae	Cymodocea nodosa	(Ucria) Ascherson	6 m	-			1
Plantae	Tracheophyta	Magnoliopsida	Alismatales	Posidoniaceae	Posidonia oceanica	(Linnaeus) Delile	10-22 m	-			x

## Sheet: Coastal Plants
Phylum	Order	Family	Genus	Species
Magnoliophyta	Apiales	Apiaceae	Cachrys	Cachrys sicula L.
Magnoliophyta	Apiales	Apiaceae	Crithmum	Crithmum maritimum L.
Magnoliophyta	Apiales	Apiaceae	Daucus	Daucus carota L. subsp. carota
Magnoliophyta	Apiales	Apiaceae	Hellenocarum	Hellenocarum multiflorum (Sm.) H.Wolff
Magnoliophyta	Asparagales	Amaryllidaceae	Allium	Allium commutatum Guss.
Magnoliophyta	Asparagales	Amaryllidaceae	Allium	Allium subhirsutum L. subsp. subhirsutum
Magnoliophyta	Asparagales	Anacardiaceae	Pistacia	Pistacia lentiscus L.
Magnoliophyta	Asparagales	Iridaceae	Moraea	Moraea sisyrinchium (L.) Ker Gawl.
Magnoliophyta	Asterales	Asteraceae	Anthemis	Anthemis peregrina L.
Magnoliophyta	Asterales	Asteraceae	Centaurea	Centaurea deusta Ten.
Magnoliophyta	Asterales	Asteraceae	Cichorium	Cichorium intybus L.
Magnoliophyta	Asterales	Asteraceae	Dittrichia	Dittrichia viscosa (L.) Greuter subsp. viscosa
Magnoliophyta	Asterales	Asteraceae	Hypochaeris	Hypochaeris laevigata (L.) Ces., Pass. & Gibelli
Magnoliophyta	Asterales	Asteraceae	Jacobaea	Jacobaea maritima (L.) Pelser & Meijden subsp. maritima
Magnoliophyta	Asterales	Asteraceae	Leontodon	Leontodon apulus (Fiori) Brullo
Magnoliophyta	Asterales	Asteraceae	Limbarda	Limbarda crithmoides (L.) Dumort. subsp. longifolia (Arcang.) Greuter
Magnoliophyta	Asterales	Asteraceae	Phagnalon	Phagnalon rupestre (L.) DC. subsp. illyricum (H.Lindb.) Ginzb.
Magnoliophyta	Asterales	Asteraceae	Picris	Picris hieracioides L. subsp. hieracioides
Magnoliophyta	Asterales	Asteraceae	Reichardia	Reichardia picroides (L.) Roth (Asteraceae)
Magnoliophyta	Asterales	Asteraceae	Sonchus	Sonchus oleraceus L. (Asteraceae)
Magnoliophyta	Asterales	Asteraceae	Sonchus	Sonchus tenerrimus L. (Asteraceae)
Magnoliophyta	Asterales	Campanulaceae	Asyneuma	Asyneuma limonifolium (L.) Janch. subsp. limonifolium
Magnoliophyta	Asterales	Campanulaceae	Campanula	Campanula erinus L.
Magnoliophyta	Asterales	Campanulaceae	Campanula	Campanula versicolor Andrews
Magnoliophyta	Boraginales	Boraginaceae	Echium	Echium plantagineum L.
Magnoliophyta	Brassicales	Brassicaceae	Aurinia	Aurinia leucadea (Guss.) K.Koch
Magnoliophyta	Brassicales	Capparaceae	Capparis	Capparis orientalis Veill.
Magnoliophyta	Caryophyllales	Amaranthaceae	Beta	Beta vulgaris L. subsp. maritima (L.) Arcang.
Magnoliophyta	Caryophyllales	Amaranthaceae	Salicornia	Salicornia fruticosa (L.) L.
Magnoliophyta	Caryophyllales	Caryophyllaceae	Dianthus	Dianthus japigicus Bianco & Brullo
Magnoliophyta	Caryophyllales	Caryophyllaceae	Silene	Silene sedoides Poir. subsp. sedoides
Magnoliophyta	Caryophyllales	Caryophyllaceae	Silene	Silene vulgaris (Moench) Garcke subsp. tenoreana (Colla) Soldano & F.Conti
Magnoliophyta	Caryophyllales	Frankeniaceae	Frankenia	Frankenia laevis L. subsp. laevis
Magnoliophyta	Caryophyllales	Plumbaginaceae	Limoniastrum	Limoniastrum monopetalum (L.) Boiss.
Magnoliophyta	Caryophyllales	Plumbaginaceae	Limonium	Limonium bellidifolium (Gouan) Dumort.
Magnoliophyta	Caryophyllales	Plumbaginaceae	Limonium	Limonium japygicum (E.Groves) Pignatti ex Pignatti, Galasso & Nicolella
Magnoliophyta	Caryophyllales	Plumbaginaceae	Limonium	Limonium virgatum (Willd.) Fourr.
Magnoliophyta	Caryophyllales	Aizoaceae	Carpobrotus	Carpobrotus edulis (L.) N.E.Br.
Magnoliophyta	Dipsacales	Caprifoliaceae	Lonicera	Lonicera implexa Aiton subsp. implexa
Magnoliophyta	Dipsacales	Dipsacaceae	Sixalix	Sixalix atropurpurea (L.) Greuter & Burdet
Magnoliophyta	Dipsacales	Valerianaceae	Centranthus	Centranthus ruber (L.) DC. subsp. ruber
Magnoliophyta	Fabales	Fabaceae	Bituminaria	Bituminaria bituminosa (L.) C.H.Stirt.
Magnoliophyta	Fabales	Fabaceae	Lotus	Lotus cytisoides L.
Magnoliophyta	Fabales	Fabaceae	Trigonella	Trigonella sulcata (Desf.) Coulot & Rabaute
Magnoliophyta	Gentianales	Gentianaceae	Centaurium	Centaurium erythraea Rafn subsp. erythraea
Magnoliophyta	Gentianales	Rubiaceae	Valantia	Valantia muralis L.
Magnoliophyta	Lamiales	Acanthaceae	Acanthus	Acanthus mollis L. subsp. mollis
Magnoliophyta	Lamiales	Lamiaceae	Micromeria	Micromeria graeca (L.) Benth. ex Rchb. subsp. graeca
Magnoliophyta	Lamiales	Lamiaceae	Phlomis	Phlomis fruticosa L.
Magnoliophyta	Lamiales	Lamiaceae	Satureja	Satureja cuneifolia Ten.
Magnoliophyta	Lamiales	Lamiaceae	Stachys	Stachys major (L.) Bartolucci & Peruzzi
Magnoliophyta	Lamiales	Oleaceae	Olea	Olea europaea L.
Magnoliophyta	Lamiales	Orobanchaceae	Orobanche	Orobanche crenata Forssk.
Magnoliophyta	Lamiales	Plantaginaceae	Cymbalaria	Cymbalaria pubescens (C.Presl) Cufod.
Magnoliophyta	Lamiales	Plantaginaceae	Misopates	Misopates orontium (L.) Raf.
Magnoliophyta	Lamiales	Plantaginaceae	Plantago	Plantago macrorhiza Poir.
Magnoliophyta	Lamiales	Plantaginaceae	Plantago	Plantago serraria L.
Magnoliophyta	Lamiales	Plantaginaceae	Veronica	Veronica hederifolia L.
Magnoliophyta	Lamiales	Scrophulariaceae	Scrophularia	Scrophularia lucida L.
Magnoliophyta	Malpighiales	Euphorbiaceae	Euphorbia	Euphorbia segetalis L.
Magnoliophyta	Malpighiales	Euphorbiaceae	Mercurialis	Mercurialis annua L.
Magnoliophyta	Malvales	Malvaceae	Malva	Malva arborea (L.) Webb & Berthel.
Magnoliophyta	Myrtales	Myrtaceae	Myrtus	Myrtus communis L.
Magnoliophyta	Poales	Poaceae	Brachypodium	Brachypodium retusum (Pers.) P.Beauv.
Magnoliophyta	Poales	Poaceae	Briza	Briza maxima L.
Magnoliophyta	Poales	Poaceae	Catapodium	Catapodium rigidum (L.) C.E.Hubb. subsp. rigidum
Magnoliophyta	Poales	Poaceae	Dactylis	Dactylis glomerata L. subsp. hispanica (Roth) Nyman
Magnoliophyta	Poales	Poaceae	Elymus	Elymus repens (L.) Gould subsp. repens
Magnoliophyta	Poales	Poaceae	Hyparrhenia	Hyparrhenia hirta (L.) Stapf subsp. hirta
Magnoliophyta	Poales	Poaceae	Lagurus	Lagurus ovatus L. subsp. ovatus
Magnoliophyta	Poales	Poaceae	Melica	Melica ciliata L. subsp. ciliata
Magnoliophyta	Rosales	Moraceae	Ficus	Ficus carica L.
Magnoliophyta	Rosales	Urticaceae	Parietaria	Parietaria judaica L.
Magnoliophyta	Santalales	Santalaceae	Osyris	Osyris alba L.
Magnoliophyta	Saxifragales	Crassulaceae	Petrosedum	Petrosedum sediforme (Jacq.) Grulich
Magnoliophyta	Saxifragales	Crassulaceae	Phedimus	Phedimus stellatus (L.) Raf.
Magnoliophyta	Saxifragales	Crassulaceae	Sedum	Sedum dasyphyllum L.
Magnoliophyta	Saxifragales	Crassulaceae	Umbilicus	Umbilicus horizontalis (Guss.) DC.
Magnoliophyta	Solanales	Convolvulaceae	Convolvulus	Convolvulus arvensis L.
Polypodiophyta	Polypodiales	Aspleniaceae	Asplenium	Asplenium ceterach L. subsp. ceterach
Polypodiophyta	Polypodiales	Polypodiaceae	Polypodium	Polypodium cambricum L.

## Sheet: TO READ FIRST
Supplementary materials for Micaroni et al. Project "Biodiversity MARE Tricase": a Species Inventory of the Coastal Area of Southeastern Salento (Ionian Sea, Italy). Diversity
Table S1. Complete list of marine species and coastal plants found during the project Biodiversity MARE Tricase with indication of the depth or depth range at which the taxa were recorded, the number of specimens sampled and recorded, phenology, whether the taxa is a non-indigenous species, whether the taxa is a new record for the area, and the reference for records already published in previous …
Marine Organisms
In the "Marine Organisms" table, in the column "Specimens collects (abundance in the area)", we reported both number of specimens collected during this study and the abundance for selected species on a semi-quantitative scale.
Common = the species was abundant in the area and several specimens were observed or collected.
Uncommon = only a few specimens were observed, or the species was limited to specific locations or periods of the year.
Rare = only 1 or 2 specimens were found, despite we extensively looked for this species.
PLEASE NOTE: if abundance is not reported in brackets, the number of specimens collected is not indicative of their abundance in the area. Many species were observed several times but collected or recorded only 1 or 2 times, because the purpose of this work was to produce a qualitative list of species.
References:
Costa, G.; Bavestrello, G.; Micaroni, V.; Pansini, M.; Strano, F.; Bertolino, M. Sponge community variation along the Apulian coasts (Otranto Strait) over a pluri-decennial time span. Does water warming drive a sponge diversity increasing in the Mediterranean Sea? J. Mar. Biol. Assoc. UK 2019, 99, 1519–1534.
Micaroni, V.; Strano, F.; Di Franco, D.; Crocetta, F.; Grech, D.; Piraino, S.; Boero, F. Project “Biodiversity MARE Tricase”: A biodiversity inventory of the coastal area of Tricase (Ionian Sea, Italy)—Mollusca: Heterobranchia. Eur. Zool. J. 2018, 85, 180–193.
