# Supplementary material for: Project “Biodiversity MARE Tricase”: A Species Inventory of the Coastal Area of Southeastern Salento (Ionian Sea, Italy)
Source: MDPI journal article supplement (doi:10.3390/d14110904), 2022-10-26
Supplement: s1 [file Table S2. Specimens list 11.10.2022_1652.xlsx]

## Sheet: Specimen list
CO	DE	Date	Site	Coordinates	Deepth (m)	Temperature (°C)	Sampling Method	Substrate	Taxa	Phenology	Notes
A	2	2016-04-03	Tricase Porto - Avamposto	39°55'45.1"N 18°23'45.4"E	0	-	From shore - Visual collection technique & Substrate Sampling	Rocky	Cladophora laetevirens
A	3	2016-04-03	Tricase Porto - Avamposto	39°55'45.1"N 18°23'45.4"E	0	-	From shore - Visual collection technique & Substrate Sampling	Rocky	Callithamnion granulatum		common in the cave
A	5	2016-04-03	Tricase Porto - Avamposto	39°55'45.1"N 18°23'45.4"E	0	-	From shore - Visual collection technique & Substrate Sampling	Rocky	Ericaria amentacea
A	7	2016-04-03	Tricase Porto - Avamposto	39°55'45.1"N 18°23'45.4"E	0	-	From shore - Visual collection technique & Substrate Sampling	Rocky	Polysiphonia opaca
A	8	2016-04-03	Tricase Porto - Avamposto	39°55'45.1"N 18°23'45.4"E	0	-	Free diving - Visual collection technique & Substrate Sampling	Rocky	Bryopsis sp.		on floating plastic
A	10	2016-04-03	Tricase Porto - Avamposto	39°55'45.1"N 18°23'45.4"E	0	-	From shore - Visual collection technique & Substrate Sampling	Rocky	Ellisolandia elongata
A	11	2016-04-03	Tricase Porto - Avamposto	39°55'45.1"N 18°23'45.4"E	0	-	From shore - Visual collection technique & Substrate Sampling	Rocky	Polysiphonia sertularioides
A	13	2016-04-03	Tricase Porto - Avamposto	39°55'45.1"N 18°23'45.4"E	0	-	From shore - Visual collection technique & Substrate Sampling	Rocky	Dictyota dichotoma		around 30 specimens
A	18	2016-04-15	Tricase Porto - Pool	39°55'51.1"N 18°23'44.9"E	1	15	From shore - Visual collection technique & Substrate Sampling	Rocky	Cladophora sp.
A	19	2016-04-15	Tricase Porto - Avamposto	39°55'45.1"N 18°23'45.4"E	1	16	Free diving - Visual collection technique & Substrate Sampling	Rocky	Cystoseira compressa
A	20	2016-04-15	Tricase Porto - Pool	39°55'51.1"N 18°23'44.9"E	0	15	From shore - Visual collection technique & Substrate Sampling	Rocky	Padina pavonica
A	21	2016-04-20	Tricase Porto - Punta Destra	39°55'34.2"N 18°23'46.2"E	5	15	Free diving - Visual collection technique & Substrate Sampling	Rocky	Peyssonnelia squamaria
A	22	2016-04-23	Tricase Porto - Avamposto	39°55'45.1"N 18°23'45.4"E	3	16	Free diving - Visual collection technique & Substrate Sampling	Rocky	Pseudochlorodesmis furcellata
A	23	2016-05-09	Marina Serra - Porticciolo	39°54'38.2"N 18°23'36.7"E	10	16	SCUBA diving - Visual collection technique with Transects	Rocky	Halimeda tuna
A	24	2016-05-09	Marina Serra - Porticciolo	39°54'38.2"N 18°23'36.7"E	10	16	SCUBA diving - Visual collection technique with Transects	Rocky	Flabellia petiolata
A	25	2016-05-09	Marina Serra - Porticciolo	39°54'38.2"N 18°23'36.7"E	10	16	SCUBA diving - Visual collection technique with Transects	Rocky	Codium cf. vermilara
A	26	2016-05-09	Marina Serra - Porticciolo	39°54'38.2"N 18°23'36.7"E	10	16	SCUBA diving - Visual collection technique with Transects	Rocky	Wrangelia penicillata
A	27	2016-05-09	Marina Serra - Porticciolo	39°54'38.2"N 18°23'36.7"E	10	16	SCUBA diving - Visual collection technique with Transects	Rocky	Colpomenia sinuosa
A	28	2016-05-09	Marina Serra - Porticciolo	39°54'38.2"N 18°23'36.7"E	8	16	SCUBA diving - Visual collection technique with Transects	Rocky	Caulerpa cylindracea
A	29	2016-05-09	Marina Serra - Porticciolo	39°54'38.2"N 18°23'36.7"E	10	16	SCUBA diving - Visual collection technique with Transects	Rocky	Halopteris scoparia
A	30	2016-05-09	Marina Serra - Porticciolo	39°54'38.2"N 18°23'36.7"E	8	16	SCUBA diving - Visual collection technique with Transects	Rocky	Dictyota dichotoma
A	32	2016-05-09	Marina Serra - Porticciolo	39°54'38.2"N 18°23'36.7"E	10	16	SCUBA diving - Visual collection technique with Transects	Rocky	Sphaerococcus coronopifolius
A	34	2016-05-09	Marina Serra - Porticciolo	39°54'38.2"N 18°23'36.7"E	10	16	SCUBA diving - Visual collection technique with Transects	Rocky	Jania virgata
A	35	2016-05-09	Marina Serra - Porticciolo	39°54'38.2"N 18°23'36.7"E	10	16	Free diving - Visual collection technique & Substrate Sampling	Rocky	Acetabularia acetabulum
A	36	2016-05-09	Marina Serra - Porticciolo	39°54'38.2"N 18°23'36.7"E	10	16	Free diving - Visual collection technique & Substrate Sampling	Rocky	Codium coralloides
A	37	2016-05-09	Marina Serra - Porticciolo	39°54'38.2"N 18°23'36.7"E	8	16	Free diving - Visual collection technique & Substrate Sampling	Rocky	Codium bursa
A	38	2016-05-15	Tricase Area	39°55'46.5"N 18°24'19.8"E	30	-	Artisanal fishers	Coralligenous rubble	Irvinea boergesenii
A	39	2016-05-25	Tricase Porto - Avamposto	39°55'45.1"N 18°23'45.4"E	0	-	Free diving - Visual collection technique & Substrate Sampling	Rocky	Rivularia ind
A	40	2016-05-25	Marina Serra Area	39°54'25.4"N 18°23'57.5"E	6	-	Artisanal fishers - Set monofilament gillnet	-	Cymodocea nodosa
A	41	2016-05-25	Tricase Porto - Avamposto	39°55'45.1"N 18°23'45.4"E	0	-	Free diving - Visual collection technique & Substrate Sampling	Rocky	Cystoseira compressa
A	42	2016-05-31	Tricase Porto - Avamposto	39°55'45.1"N 18°23'45.4"E	0	19	Free diving - Visual collection technique & Substrate Sampling	Rocky	Liagora viscida
A	43	2016-05-31	Tricase Porto - Avamposto	39°55'45.1"N 18°23'45.4"E	7	19	Free diving - Visual collection technique & Substrate Sampling	Rocky	Sphaerococcus coronopifolius
A	44	2016-06-08	Tricase Area	39°55'46.5"N 18°24'19.8"E	-	-	Artisanal fishers	-	Posidonia oceanica
A	45	2016-06-26	Tricase Porto - Avamposto	39°55'45.1"N 18°23'45.4"E	1	22	Free diving - Photographic sampling	Rocky	Dictyopteris polypodioides
A	46	2016-06-27	Marina Serra Area	39°54'25.4"N 18°23'57.5"E	2	24	Free diving - Photographic sampling	Rocky	Valonia utricularis
A	47	2016-07-06	Tricase Porto - Avamposto	39°55'45.1"N 18°23'45.4"E	2	24	Free diving - Visual collection technique & Substrate Sampling	Rocky	Dictyota dichotoma
A	49	2016-07-06	Tricase Porto - Avamposto	39°55'45.1"N 18°23'45.4"E	1	24	Free diving - Visual collection technique & Substrate Sampling	Rocky	Cystoseira compressa
A	50	2016-07-06	Tricase Porto - Avamposto	39°55'45.1"N 18°23'45.4"E	1	24	Free diving - Visual collection technique & Substrate Sampling	Rocky	Cystoseira compressa
A	51	2016-07-06	Tricase Porto - Avamposto	39°55'45.1"N 18°23'45.4"E	2	24	Free diving - Visual collection technique & Substrate Sampling	Rocky	Palisada perforata
A	52	2016-07-06	Tricase Porto - Avamposto	39°55'45.1"N 18°23'45.4"E	1	24	Free diving - Visual collection technique & Substrate Sampling	Rocky	Laurencia glandulifera
A	53	2016-07-06	Tricase Porto - Avamposto	39°55'45.1"N 18°23'45.4"E	1	24	Free diving - Visual collection technique & Substrate Sampling	Rocky	Laurencia cf. obtusa
A	55	2016-07-06	Tricase Porto - Avamposto	39°55'45.1"N 18°23'45.4"E	1	24	Free diving - Visual collection technique & Substrate Sampling	Rocky	Amphiroa rigida
A	56	2016-07-06	Tricase Porto - Avamposto	39°55'45.1"N 18°23'45.4"E	1	24	Free diving - Visual collection technique & Substrate Sampling	Rocky	Amphiroa rigida
A	57	2016-07-06	Tricase Porto - Avamposto	39°55'45.1"N 18°23'45.4"E	2	24	Free diving - Visual collection technique & Substrate Sampling	Rocky	Jania rubens
A	58	2016-07-06	Tricase Porto - Avamposto	39°55'45.1"N 18°23'45.4"E	2	24	Free diving - Visual collection technique & Substrate Sampling	Rocky	Liagora viscida
A	60	2016-07-06	Tricase Porto - Avamposto	39°55'45.1"N 18°23'45.4"E	2	24	Free diving - Visual collection technique & Substrate Sampling	Rocky	Hypnea musciformis
A	61	2016-07-06	Tricase Porto - Avamposto	39°55'45.1"N 18°23'45.4"E	10	24	Free diving - Visual collection technique & Substrate Sampling	Rocky	Halopteris scoparia
A	62	2016-07-06	Tricase Porto - Avamposto	39°55'45.1"N 18°23'45.4"E	-	24	Free diving - Visual collection technique & Substrate Sampling	Rocky	Dictyopteris polypodioides
A	63	2016-07-06	Tricase Porto - Avamposto	39°55'45.1"N 18°23'45.4"E	1	24	Free diving - Visual collection technique & Substrate Sampling	Rocky	Gastroclonium clavatum
A	65	2016-07-06	Tricase Porto - Avamposto	39°55'45.1"N 18°23'45.4"E	2	24	Free diving - Visual collection technique & Substrate Sampling	Rocky	Anadyomene stellata
A	66	2016-06-28	Tricase Porto - Breakwater	39°55'53.0"N 18°23'47.4"E	11	24	Free diving - Photographic sampling	Rocky	Wrangelia penicillata
A	67	2016-07-06	Tricase Porto - Avamposto	39°55'45.1"N 18°23'45.4"E	2	24	Free diving - Photographic sampling	Rocky	Padina pavonica
A	68	2016-06-26	Tricase Porto - Avamposto	39°55'45.1"N 18°23'45.4"E	1	22	Free diving - Photographic sampling	Rocky	Tenarea tortuosa
A	69	2016-08-10	Tricase Porto - L'isola	39°56'49.9"N 18°24'06.8"E	15	-	SCUBA diving - Photographic sampling	Rocky	Halymenia floresii
A	70	2016-08-10	Tricase Porto - L'isola	39°56'49.9"N 18°24'06.8"E	20	-	SCUBA diving - Photographic sampling	Coralligenous	Peyssonnelia squamaria
A	71	2016-08-10	Tricase Porto - L'isola	39°56'49.9"N 18°24'06.8"E	20	-	SCUBA diving - Photographic sampling	Coralligenous	Peyssonnelia rosa-marina		on intertidal algae
A	72	2016-08-10	Tricase Porto - L'isola	39°56'49.9"N 18°24'06.8"E	20	-	SCUBA diving - Photographic sampling	Coralligenous	Anadyomene stellata
A	73	2016-08-10	Tricase Porto - L'isola	39°56'49.9"N 18°24'06.8"E	18	-	SCUBA diving - Photographic sampling	Rocky	Jania virgata
A	74	2016-08-16	Tricase Porto - Punta Destra	39°55'34.2"N 18°23'46.2"E	5	-	Free diving - Visual collection technique & Substrate Sampling	Rocky	Codium cf. vermilara
A	75	2016-08-17	Tricase Porto - Punta Destra	39°55'34.2"N 18°23'46.2"E	1	-	Free diving - Visual collection technique & Substrate Sampling	Rocky	Gelidium spinosum
A	76	2016-08-10	Tricase Porto - L'isola	39°56'49.9"N 18°24'06.8"E	-	-	SCUBA diving - Photographic sampling	Rocky	Codium coralloides
A	77	2016-09-13	Tricase Porto - L'isola	39°56'49.9"N 18°24'06.8"E	10	-	SCUBA diving - Visual collection technique & Substrate Sampling	Rocky	Sargassum vulgare
A	78	2016-09-13	Tricase Porto - L'isola	39°56'49.9"N 18°24'06.8"E	8	-	SCUBA diving - Visual collection technique & Substrate Sampling	Rocky	Codium coralloides
A	79	2016-09-14	Tricase Porto - Rio	39°55'10.5"N 18°23'39.5"E	15	-	SCUBA diving - Photographic sampling	Rocky	Caulerpa prolifera
A	81	2016-09-25	Tricase Porto - Avamposto	39°55'45.1"N 18°23'45.4"E	10	-	SCUBA diving - Visual collection technique & Substrate Sampling	Rocky	Peyssonnelia heteromorpha
A	82	2016-09-25	Tricase Porto - Avamposto	39°55'45.1"N 18°23'45.4"E	10	-	SCUBA diving - Visual collection technique & Substrate Sampling	Rocky	Tricleocarpa fragilis
A	83	2016-09-26	Guardiola caves	39°51'59.9"N 18°23'42.4"E	5-10	-	SCUBA diving - Visual collection technique & Substrate Sampling	Cave	Lithophyllum stictiforme
A	85	2016-09-28	Marina Serra Area	39°54'25.4"N 18°23'57.5"E	3	-	Free diving - Visual collection technique & Substrate Sampling	Rocky	Asparagopsis taxiformis
A	86	2016-09-28	Marina Serra Area	39°54'25.4"N 18°23'57.5"E	3	-	Free diving - Visual collection technique & Substrate Sampling	Rocky	Lithophyllum cf. incrustans		Occurrence (VI-VII)
A	87	2016-09-30	Tricase Porto - Rio	39°55'10.5"N 18°23'39.5"E	22	-	SCUBA diving - Photographic sampling	Coralligenous	Predaea ollivieri		Found at night
A	88	2016-04-06	Tricase Porto - Avamposto	39°55'45.1"N 18°23'45.4"E	0	-	From shore - Visual collection technique & Substrate Sampling	Rocky	Chaetomorpha linum
A	89	2016-07-06	Tricase Porto - Avamposto	39°55'45.1"N 18°23'45.4"E	2	24	Free diving - Visual collection technique & Substrate Sampling	Rocky	Gayliella mazoyerae
A	90	2016-05-09	Marina Serra - Porticciolo	39°54'38.2"N 18°23'36.7"E	10	16	SCUBA diving - Visual collection technique with Transects	Rocky	Crouania attenuata		Medusa stage occurrence (II; VI)
A	91	2016-05-25	Tricase Porto - Avamposto	39°55'45.1"N 18°23'45.4"E	0	-	From shore - Visual collection technique & Substrate Sampling	Rocky	Chondria sp.		Occurrence (III-IV)
A	92	2016-04-20	Tricase Porto - Punta Destra	39°55'34.2"N 18°23'46.2"E	5	15	Free diving - Visual collection technique & Substrate Sampling	Epibiont	Zanardinia typus
A	93	2016-04-20	Tricase Porto - Punta Destra	39°55'34.2"N 18°23'46.2"E	5	15	Free diving - Visual collection technique & Substrate Sampling	Epibiont	Contarinia squamariae		on bivalve
A	94	2016-11-03	Tricase Porto - Rio	39°55'10.5"N 18°23'39.5"E	30	-	Artisanal fishers - Set monofilament gillnet	Coralligenous	Phyllophora crispa		Occurrence (XI-I)
A	95	2016-11-03	Tricase Porto - Rio	39°55'10.5"N 18°23'39.5"E	30	-	Artisanal fishers - Set monofilament gillnet	Coralligenous	Botryocladia sp.
A	96	2016-11-03	Tricase Porto - Rio	39°55'10.5"N 18°23'39.5"E	30	-	Artisanal fishers - Set monofilament gillnet	Coralligenous	Osmundaria volubilis
A	97	2017-02-16	Tricase Porto - Punta Destra	39°55'34.2"N 18°23'46.2"E	1	-	Free diving - Visual collection technique & Substrate Sampling	Rocky	Bryopsis cf. pennata
A	98	2017-02-16	Tricase Porto - Punta Destra	39°55'34.2"N 18°23'46.2"E	1	-	Free diving - Visual collection technique & Substrate Sampling	Rocky	Schottera nicaeensis
A	99	2017-02-16	Tricase Porto - Punta Destra	39°55'34.2"N 18°23'46.2"E	1	-	Free diving - Visual collection technique & Substrate Sampling	Rocky	Hypoglossum hypoglossoides
A	100	2017-02-16	Tricase Porto - Punta Destra	39°55'34.2"N 18°23'46.2"E	1	-	Free diving - Visual collection technique & Substrate Sampling	Rocky	Sphaerococcus coronopifolius
A	101	2017-02-23	Castro - Acquaviva Cave	39°59'28.0"N 18°24'53.3"E	4	-	SCUBA diving - Visual collection technique & Substrate Sampling	Cave	Palmophyllum crassum
A	102	2017-04-01	Marittima	39°58'55.7"N 18°24'45.5"E	0	-	From shore - Visual collection technique & Substrate Sampling	Rocky	Ceramium diaphanum		Reproductive behaviour (VIII)
A	103	2017-04-01	Marittima	39°58'55.7"N 18°24'45.5"E	0	-	From shore - Visual collection technique & Substrate Sampling	Rocky	Bryopsis cupressina
A	104	2017-04-09	Tricase Porto - Rio	39°55'10.5"N 18°23'39.5"E	0	-	From shore - Visual collection technique & Substrate Sampling	Rocky	Pterocladiella capillacea
A	105	2017-04-09	Tricase Porto - Rio	39°55'10.5"N 18°23'39.5"E	0	-	From shore - Visual collection technique & Substrate Sampling	Rocky	Ulva linza
A	106	2017-04-09	Tricase Porto - Rio	39°55'10.5"N 18°23'39.5"E	0	-	From shore - Visual collection technique & Substrate Sampling	Rocky	Ulva linza
A	107	2017-04-09	Tricase Porto - Rio	39°55'10.5"N 18°23'39.5"E	0	-	From shore - Visual collection technique & Substrate Sampling	Rocky	Ceramium cf. virgatum
A	108	2017-04-09	Tricase Porto - Rio	39°55'10.5"N 18°23'39.5"E	2	-	From shore - Visual collection technique & Substrate Sampling	Rocky	Hypnea musciformis
A	109	2017-04-09	Tricase Porto - Rio	39°55'10.5"N 18°23'39.5"E	0	-	From shore - Visual collection technique & Substrate Sampling	Rocky	Chondracanthus acicularis
A	110	2017-04-09	Tricase Porto - Rio	39°55'10.5"N 18°23'39.5"E	0	-	From shore - Visual collection technique & Substrate Sampling	Rocky	Osmundea truncata
A	111	2017-04-08	Tricase Porto - New Marina	39°55'54.1"N 18°23'45.7"E	0	-	From shore - Visual collection technique & Substrate Sampling	Rocky	Colpomenia sinuosa
A	112	2017-04-08	Tricase Porto - New Marina	39°55'54.1"N 18°23'45.7"E	1	-	From shore - Visual collection technique & Substrate Sampling	Rocky	Scytosiphon lomentaria
A	113	2017-04-08	Tricase Porto - New Marina	39°55'54.1"N 18°23'45.7"E	1	-	From shore - Visual collection technique & Substrate Sampling	Rocky	Cutleria multifida
A	114	2017-04-13	Tricase Porto - Avamposto	39°55'45.1"N 18°23'45.4"E	1	-	From shore - Visual collection technique & Substrate Sampling	Epibiont	Vertebrata fruticulosa
A	115	2017-04-30	Ciolo Cave	39°50'39.5"N 18°23'11.4"E	3	-	SCUBA diving - Visual collection technique & Substrate Sampling	Cave	Cladostephus hirsutus		inside rock
A	116	2017-03-22	Tricase Porto - Avamposto	39°55'45.1"N 18°23'45.4"E	0	-	Free diving - Photographic sampling	Rocky	Lithophyllum byssoides
A	117	2017-08-06	Funnuvojere	39°53'11.1"N 18°23'56.3"E	40	-	SCUBA diving - Visual collection technique & Substrate Sampling	Coralligenous	Nereia filiformis
A	119	2017-08-31	Marina Serra - Lavaturo	39°54'27.9"N 18°23'28.7"E	20	-	SCUBA diving - Visual collection technique & Substrate Sampling	Artificial substrate	Cystoseira foeniculacea
A	120	-	-	-	-	-	-	-	Dasya rigidula		Locally abundant in the bay at the entrance of the cave
A	121	-	-	-	-	-	-	-	Dictyota cf. implexa		Common at Funnuvojere
A	122	-	-	-	-	-	-	-	Erythrotrichia carnea
A	123	-	-	-	-	-	-	-	Herposiphonia secunda
A	124	-	-	-	-	-	-	-	Laurencia cf. microcladia
A	125	-	-	-	-	-	-	-	Peyssonnelia rubra
A	126	-	-	-	-	-	-	-	Platoma cyclocolpum
A	127	-	-	-	-	-	-	-	Pneophyllum fragile
A	128	-	-	-	-	-	-	-	Sphacelaria sp.
A	129	-	-	-	-	-	-	-	Titanoderma trochanter
A	130	-	-	-	-	-	-	-	Xiphosiphonia pennata
A	1B	2016-04-03	Tricase Porto - Avamposto	39°55'45.1"N 18°23'45.4"E	0	-	From shore - Visual collection technique & Substrate Sampling	Rocky	Cladophora dalmatica
AL	1	2016-04-26	Tricase Porto - Avamposto	39°55'45.1"N 18°23'45.4"E	5	15	Free diving - Visual collection technique & Substrate Sampling	Pelagic	Alciopidae	Occurrence (IV)
AL	3	2016-05-09	Marina Serra - Porticciolo	39°54'38.2"N 18°23'36.7"E	10	16	SCUBA diving - Visual collection technique with Transects	Rocky	Spirorbis sp.
AL	4	2016-05-09	Marina Serra - Porticciolo	39°54'38.2"N 18°23'36.7"E	10	16	Free diving - Visual collection technique & Substrate Sampling	Rocky	Sabella spallanzanii
AL	5	2016-05-21	Tricase Area	39°55'46.5"N 18°24'19.8"E	60	-	Artisanal fishers - Set nylon trammel net	Coralligenous	Hydroides elegans
AL	7	2016-06-08	Tricase Area	39°55'46.5"N 18°24'19.8"E	-	-	Artisanal fishers	-	Hermodice carunculata
AL	8	2016-06-08	Tricase Area	39°55'46.5"N 18°24'19.8"E	20	-	Artisanal fishers	-	Ceratonereis costae
AL	9	2016-06-09	Tricase Porto - Punta Destra	39°55'34.2"N 18°23'46.2"E	2	19	Free diving - Visual collection technique & Substrate Sampling	Rocky	Syllidae
AL	10	2016-06-08	Tricase Area	39°55'46.5"N 18°24'19.8"E	-	-	Artisanal fishers	-	Serpulidae
AL	11	2016-06-08	Tricase Area	39°55'46.5"N 18°24'19.8"E	-	-	Artisanal fishers	Parassite	Pontobdella muricata
AL	12	2016-06-10	Tricase Area	39°55'46.5"N 18°24'19.8"E	60	-	Artisanal fishers - Set nylon trammel net	Coralligenous	Spirobranchus triqueter		on Peyssonnelia sp (A21)
AL	13	2016-06-15	Tricase Area	39°55'46.5"N 18°24'19.8"E	50	-	Artisanal fishers - Set nylon trammel net	Coralligenous	Vermiliopsis infundibulum
AL	14	2016-06-14	Tricase Area	39°55'46.5"N 18°24'19.8"E	25	-	Artisanal fishers - Set nylon trammel net	Coralligenous	Harmothoe pagenstecheri
AL	15	2016-06-22	Funnuvojere	39°53'11.1"N 18°23'56.3"E	60-70	-	Artisanal fishers - Set nylon trammel net	Coralligenous rubble	Hesionidae
AL	16	2016-06-22	Funnuvojere	39°53'11.1"N 18°23'56.3"E	70	-	Artisanal fishers - Set nylon trammel net	Coralligenous rubble	Lysidice collaris		On Cystoseira compressa
AL	17	2016-06-16	Tricase Area	39°55'46.5"N 18°24'19.8"E	-	-	Artisanal fishers	Parassite	Branchellion torpedinis		on Cystoseira amentacea. Very abundant
AL	18	2016-05-31	Tricase Area	39°55'46.5"N 18°24'19.8"E	60	-	Artisanal fishers - Set nylon trammel net	Parassite	Myzostoma glabrum		on rope in the marina
AL	19	2016-05-01	Tricase Area	39°55'46.5"N 18°24'19.8"E	70	-	Artisanal fishers - Set nylon trammel net	-	Lepidonotus clava
AL	20	2016-05-01	Tricase Area	39°55'46.5"N 18°24'19.8"E	70	-	Artisanal fishers - Set nylon trammel net	-	Vermiliopsis infundibulum
AL	21	2016-05-01	Tricase Area	39°55'46.5"N 18°24'19.8"E	70	-	Artisanal fishers - Set nylon trammel net	-	Leodice harassii
AL	22	2016-05-01	Marina Serra Area	39°54'25.4"N 18°23'57.5"E	16-18	-	Artisanal fishers - Set nylon trammel net	-	Vermiliopsis striaticeps
AL	23	2016-05-01	Marina Serra Area	39°54'25.4"N 18°23'57.5"E	16-18	-	Artisanal fishers - Set nylon trammel net	-	Serpulidae n.d.
AL	24	2016-05-01	Tricase Area	39°55'46.5"N 18°24'19.8"E	-	-	Artisanal fishers - Set nylon trammel net	-	Streblosoma sp.
AL	25	2016-05-01	Tricase Area	39°55'46.5"N 18°24'19.8"E	35	-	Artisanal fishers - Set nylon trammel net	-	Harmothoë cf. impar
AL	26	2016-05-01	Tricase Area	39°55'46.5"N 18°24'19.8"E	-	-	Artisanal fishers - Set nylon trammel net	-	Dorvillea rubrovittata
AL	27	2016-07-28	Tricase Area	39°55'46.5"N 18°24'19.8"E	70	-	Artisanal fishers - Set nylon trammel net	Coralligenous	Leodice harassii
AL	28	2016-07-28	Tricase Area	39°55'46.5"N 18°24'19.8"E	70	-	Artisanal fishers - Set nylon trammel net	Coralligenous	Hydroides pseudouncinata
AL	30	2016-07-28	Tricase Area	39°55'46.5"N 18°24'19.8"E	-	-	Artisanal fishers - Set nylon trammel net	Coralligenous	Lysidice ninetta		on Aglaophenia octodonta (H16)
AL	31	2016-07-28	Tricase Area	39°55'46.5"N 18°24'19.8"E	20	-	Artisanal fishers - Set nylon trammel net	Coralligenous	Paraehlersia ferrugina		Caprellid on Aglaophenia (H21) with Doto (M5)
AL	32	2016-07-29	Tricase Porto - New Marina	39°55'54.1"N 18°23'45.7"E	-	-	Free diving - Visual collection technique & Substrate Sampling	Rocky	Spirorbis sp.
AL	33	2016-07-28	Tricase Area	39°55'46.5"N 18°24'19.8"E	70	-	Artisanal fishers - Set nylon trammel net	Coralligenous	Psamathe fusca		on Sertularella
AL	34	2016-07-28	Tricase Area	39°55'46.5"N 18°24'19.8"E	70	-	Artisanal fishers - Set nylon trammel net	Coralligenous	Dodecaceria concharum		on Serularella ellisii
AL	35	2016-07-28	Tricase Area	39°55'46.5"N 18°24'19.8"E	35	-	Artisanal fishers - Set nylon trammel net	Coralligenous	Dorvillea rubrovittata		in Petrosia ficiformis
AL	36	2016-07-28	Tricase Area	39°55'46.5"N 18°24'19.8"E	70	-	Artisanal fishers - Set nylon trammel net	Coralligenous	Protula sp.
AL	37	2016-07-28	Tricase Area	39°55'46.5"N 18°24'19.8"E	70	-	Artisanal fishers - Set nylon trammel net	Coralligenous	Pseudosyllis brevipennis
AL	38	2016-08-10	Tricase Porto - L'isola	39°56'49.9"N 18°24'06.8"E	15	-	SCUBA diving - Photographic sampling	Rocky	Lysidice ninetta
AL	39	2016-08-10	Tricase Porto - L'isola	39°56'49.9"N 18°24'06.8"E	-	-	SCUBA diving - Photographic sampling	Rocky	Paraehlersia ferrugina
AL	40	2016-08-10	Tricase Porto - L'isola	39°56'49.9"N 18°24'06.8"E	20	-	SCUBA diving - Photographic sampling	Coralligenous	Vermiliopsis labiata
AL	41	2016-07-27	Tricase Area	39°55'46.5"N 18°24'19.8"E	70	-	Artisanal fishers - Set nylon trammel net	Coralligenous	Protula sp.		Female
AL	42	2016-09-25	Tricase Porto - Avamposto	39°55'45.1"N 18°23'45.4"E	10	-	SCUBA diving - Visual collection technique & Substrate Sampling	Rocky	Protula sp.
AL	43	2016-09-25	Tricase Porto - Avamposto	39°55'45.1"N 18°23'45.4"E	7	-	SCUBA diving - Visual collection technique & Substrate Sampling	Soft bottom: sand	Sigalion mathildae
AL	44	2016-09-25	Tricase Porto - Avamposto	39°55'45.1"N 18°23'45.4"E	7	-	SCUBA diving - Visual collection technique & Substrate Sampling	Soft bottom: sand	Armandia polyophthalma
AL	45	2016-09-25	Tricase Porto - Avamposto	39°55'45.1"N 18°23'45.4"E	7	-	SCUBA diving - Visual collection technique & Substrate Sampling	Soft bottom: sand	Sigalion mathildae
AL	46	2016-10-03	Tricase Porto - Punta Destra	39°55'34.2"N 18°23'46.2"E	18	-	SCUBA diving - Visual collection technique & Substrate Sampling	Soft bottom: sand	Cirriformia tentaculata
AL	47	2016-10-03	Tricase Porto - Punta Destra	39°55'34.2"N 18°23'46.2"E	18	-	SCUBA diving - Visual collection technique & Substrate Sampling	Soft bottom: sand	Phylo foetida
AL	48	2016-09-25	Tricase Porto - Avamposto	39°55'45.1"N 18°23'45.4"E	10	-	SCUBA diving - Photographic sampling	Soft bottom: sand	Protula sp.
AL	52	2016-05-01	Tricase Porto - Rio	39°55'10.5"N 18°23'39.5"E	1	-	Free diving - Visual collection technique & Substrate Sampling	Rocky	Phascolosoma granulatum
AL	53	2016-07-06	Tricase Porto - Avamposto	39°55'45.1"N 18°23'45.4"E	5-15	24	Free diving - Photographic sampling	Rocky	Bonellia viridis
AL	54	-	-	-	-	-	-	-	Ceratonereis (Composetia) costae
AL	55	-	-	-	-	-	-	-	Alciopini ind		Epiphyte of Laurencia
AL	56	-	-	-	-	-	-	-	Harmothoë cf. impar		Epiphyte of Peyssonnelia squamaria (A21)
AL	57	-	-	-	-	-	-	-	Protula ind		Epiphyte of Peyssonnelia squamaria (A21)
AL	58	-	-	-	-	-	-	-	Spirorbis ind
AL	59	-	-	-	-	-	-	-	Streblosoma ind
AN	1	2016-04-15	Tricase Porto - Avamposto	39°55'45.1"N 18°23'45.4"E	0	16	Free diving - Visual collection technique & Substrate Sampling	Rocky	Actinia mediterranea
AN	2	2016-04-29	Tricase Area	39°55'46.5"N 18°24'19.8"E	-	-	Artisanal fishers - Set nylon trammel net	Coralligenous	Calliactis parasitica
AN	3	2016-05-10	Tricase Area	39°55'46.5"N 18°24'19.8"E	55	-	Artisanal fishers	Coralligenous	Paramuricea clavata
AN	4	2016-05-09	Marina Serra - Porticciolo	39°54'38.2"N 18°23'36.7"E	10	16	Free diving - Visual collection technique & Substrate Sampling	Rocky	Anemonia viridis		common in the cave
AN	5	2016-05-09	Marina Serra - Porticciolo	39°54'38.2"N 18°23'36.7"E	4	16	Free diving - Visual collection technique & Substrate Sampling	Rocky	Balanophyllia (Balanophyllia) europaea
AN	6	2016-05-09	Marina Serra - Porticciolo	39°54'38.2"N 18°23'36.7"E	8	16	Free diving - Visual collection technique & Substrate Sampling	Rocky	Cladocora caespitosa
AN	7	2016-05-09	Marina Serra - Porticciolo	39°54'38.2"N 18°23'36.7"E	8	16	Free diving - Visual collection technique & Substrate Sampling	Rocky	Exaiptasia diaphana
AN	8	2016-05-15	Tricase Area	39°55'46.5"N 18°24'19.8"E	28-30	-	Artisanal fishers - Set nylon trammel net	-	Leptogorgia sarmentosa
AN	9	2016-05-15	Tricase Area	39°55'46.5"N 18°24'19.8"E	45	-	Artisanal fishers - Set nylon trammel net	Coralligenous	Alcyonium cf. coralloides
AN	10	2016-05-21	Tricase Area	39°55'46.5"N 18°24'19.8"E	60	-	Artisanal fishers - Set nylon trammel net	Coralligenous	Epizoanthus ind
AN	11	2016-05-21	Tricase Area	39°55'46.5"N 18°24'19.8"E	60	-	Artisanal fishers - Set nylon trammel net	-	Alcyonium palmatum
AN	13	2016-06-08	Tricase Area	39°55'46.5"N 18°24'19.8"E	40	-	Artisanal fishers	-	Phyllangia americana mouchezii
AN	14	2016-06-09	Tricase Porto - Punta Destra	39°55'34.2"N 18°23'46.2"E	2	19	Free diving - Visual collection technique & Substrate Sampling	Rocky	Exaiptasia diaphana
AN	15	2016-06-10	Tricase Area	39°55'46.5"N 18°24'19.8"E	60	-	Artisanal fishers - Set nylon trammel net	Coralligenous	Savalia savaglia
AN	16	2016-06-22	Funnuvojere	39°53'11.1"N 18°23'56.3"E	15	-	Artisanal fishers - Set nylon trammel net	Coralligenous rubble	Balanophyllia (Balanophyllia) europaea
AN	17	2016-06-22	Funnuvojere	39°53'11.1"N 18°23'56.3"E	70	-	Artisanal fishers - Set nylon trammel net	Coralligenous rubble	Paracyathus pulchellus		on Hexaplex trunculus
AN	18	2016-06-25	Tricase Porto - Punta Destra	39°55'34.2"N 18°23'46.2"E	10	22	Free diving - Photographic sampling	Rocky	Cerianthus membranaceus
AN	19	2016-05-01	Tricase Area	39°55'46.5"N 18°24'19.8"E	70	-	Artisanal fishers - Set nylon trammel net	-	Pteroeides griseum
AN	20	2016-05-01	Tricase Area	39°55'46.5"N 18°24'19.8"E	-	-	-	-	Epizoanthus ind
AN	21	2016-07-28	Tricase Area	39°55'46.5"N 18°24'19.8"E	70	-	Artisanal fishers - Set nylon trammel net	Coralligenous	Cornularia cornucopiae
AN	22	2016-08-10	Tricase Porto - L'isola	39°56'49.9"N 18°24'06.8"E	21	-	SCUBA diving - Photographic sampling	Epibiont	Parazoanthus axinellae
AN	23	2016-08-18	Andrano - Grotta Verde	39°57'48.3"N 18°24'16.9"E	5	-	Free diving - Visual collection technique & Substrate Sampling	Cave	Cornularia cornucopiae
AN	24	2016-08-23	Tricase Porto - Avamposto	39°55'45.1"N 18°23'45.4"E	3	-	Free diving - Visual collection technique & Substrate Sampling	Epibiont	Paranemonia cinerea		on deep coralligenous rock
AN	25	2016-09-21	Marina Serra - Matrona Cave	39°54'20.6"N 18°23'26.2"E	4	-	SCUBA diving - Photographic sampling	Cave	Halcampoides purpureus
AN	26	2016-09-21	Marina Serra - Matrona Cave	39°54'20.6"N 18°23'26.2"E	4	-	SCUBA diving - Photographic sampling	Cave	Polycyathus muellerae
AN	27	2016-09-21	Tricase Area	39°55'46.5"N 18°24'19.8"E	60	-	Artisanal fishers - Set nylon trammel net	Coralligenous	Corallium rubrum
AN	28	2016-09-30	Tricase Porto - Rio	39°55'10.5"N 18°23'39.5"E	28	-	SCUBA diving - Photographic sampling	Soft bottom: sand	Condylactis aurantiaca
AN	29	2016-09-14	Tricase Porto - Rio	39°55'10.5"N 18°23'39.5"E	3	-	SCUBA diving - Photographic sampling	Rocky	Aiptasia mutabilis
AN	30	2016-08-11	Tricase Porto - L'isola	39°56'49.9"N 18°24'06.8"E	15	10	SCUBA diving - Photographic sampling	Rocky	Madracis pharensis
AN	33	2017-04-30	Ciolo Cave	39°50'39.5"N 18°23'11.4"E	4	-	SCUBA diving - Photographic sampling	Cave	Arachnanthus cf. oligopodus
AN	34	2017-06-25	Tricase Porto - Canalone	39°55'48.0"N 18°24'01.4"E	23	-	SCUBA diving - Photographic sampling	Coralligenous	Phymanthus pulcher
AN	36	2017-08-06	Funnuvojere	39°53'11.1"N 18°23'56.3"E	40	-	SCUBA diving - Photographic sampling	Coralligenous	Eunicella cavolini
AN	37	2017-08-17	Tricase Area	39°55'46.5"N 18°24'19.8"E	70	-	Artisanal fishers - Set nylon trammel net	Soft bottom: mud	Virgularia mirabilis
AN	38	2017-08-21	Tricase Area	39°55'46.5"N 18°24'19.8"E	70	-	Artisanal fishers - Set nylon trammel net	-	Antipathella subpinnata
B	1	2016-04-20	Tricase Porto - Punta Destra	39°55'34.2"N 18°23'46.2"E	5	15	Free diving - Visual collection technique & Substrate Sampling	Rocky	Aetea anguina
B	2	2016-05-09	Marina Serra - Porticciolo	39°54'38.2"N 18°23'36.7"E	10	16	SCUBA diving - Visual collection technique with Transects	Rocky	Myriapora truncata		on Eudendrium racemosum
B	5	2016-05-09	Marina Serra - Porticciolo	39°54'38.2"N 18°23'36.7"E	10	16	SCUBA diving - Visual collection technique with Transects	Rocky	Schizobrachiella sanguinea
B	6	2016-05-15	Tricase Area	39°55'46.5"N 18°24'19.8"E	25	-	Artisanal fishers	Coralligenous rubble	Reteporella couchii
B	7	2016-05-15	Tricase Area	39°55'46.5"N 18°24'19.8"E	30	-	Artisanal fishers	Coralligenous rubble	Caberea boryi		React to Uv with Red light, On green algae (A33)
B	8	2016-05-15	Tricase Area	39°55'46.5"N 18°24'19.8"E	50	-	Artisanal fishers	Coralligenous rubble	Bugulina calathus
B	9	2016-05-15	Tricase Area	39°55'46.5"N 18°24'19.8"E	30	-	Artisanal fishers	Coralligenous rubble	Walkeria ind		on Flabellia petiolata
B	11	2016-05-21	Tricase Area	39°55'46.5"N 18°24'19.8"E	60	-	Artisanal fishers - Set nylon trammel net	Coralligenous	Frondipora verrucosa
B	12	2016-05-15	Tricase Area	39°55'46.5"N 18°24'19.8"E	30	-	Artisanal fishers - Set nylon trammel net	Coralligenous	Reptadeonella violacea
B	17	2016-06-08	Tricase Area	39°55'46.5"N 18°24'19.8"E	-	-	Artisanal fishers	-	Mimosella gracilis
B	18	2016-06-08	Tricase Area	39°55'46.5"N 18°24'19.8"E	-	-	Artisanal fishers	-	Aetea sp.		Two varieties Intricata and other
B	19	2016-06-10	Tricase Area	39°55'46.5"N 18°24'19.8"E	70	-	Artisanal fishers - Set nylon trammel net	Coralligenous	Chartella ind
B	21	2016-06-17	Tricase Area	39°55'46.5"N 18°24'19.8"E	-	-	Artisanal fishers	Soft bottom: sand	Amathia semiconvoluta
B	22	2016-06-19	Tricase Porto - L'isola	39°56'49.9"N 18°24'06.8"E	20	-	Artisanal fishers - Set nylon trammel net	Coralligenous	Reteporella grimaldii
B	24	2016-06-19	Tricase Porto - L'isola	39°56'49.9"N 18°24'06.8"E	20	-	Artisanal fishers - Set nylon trammel net	Coralligenous	Caberea boryi		On Posidonia oceanica
B	25	2016-06-23	Andrano Area	39°58'10.1"N 18°24'50.4"E	50	-	Artisanal fishers - Set nylon trammel net	-	Calpensia nobilis
B	27	2016-07-28	Tricase Area	39°55'46.5"N 18°24'19.8"E	70	-	Artisanal fishers - Set nylon trammel net	Coralligenous	Schizomavella ind		on coralline algae A81
B	29	2016-07-28	Tricase Area	39°55'46.5"N 18°24'19.8"E	70	-	Artisanal fishers - Set nylon trammel net	Coralligenous	Beania magellanica
B	32	2016-08-10	Tricase Porto - L'isola	39°56'49.9"N 18°24'06.8"E	15	-	Free diving - Visual collection technique & Substrate Sampling	Epibiont	Mimosella gracilis
B	33	2016-09-13	Tricase Porto - L'isola	39°56'49.9"N 18°24'06.8"E	10	-	SCUBA diving - Visual collection technique & Substrate Sampling	Rocky	Schizoretepora serratimargo
B	34	2016-09-14	Tricase Porto - Rio	39°55'10.5"N 18°23'39.5"E	20	-	SCUBA diving - Visual collection technique & Substrate Sampling	Coralligenous	Adeonella pallasii		Eggs (VIII)
B	35	2016-09-14	Tricase Porto - Rio	39°55'10.5"N 18°23'39.5"E	-	-	SCUBA diving - Visual collection technique & Substrate Sampling	Rocky	Cellaria salicornioides
B	38	2016-09-25	Tricase Porto - Avamposto	39°55'45.1"N 18°23'45.4"E	10	-	SCUBA diving - Visual collection technique & Substrate Sampling	Rocky	Hippaliosina depressa
B	39	2016-09-26	Guardiola caves	39°51'59.9"N 18°23'42.4"E	25	-	SCUBA diving - Visual collection technique & Substrate Sampling	Cave	Schizoretepora serratimargo
BC	1	2016-07-28	Tricase Area	39°55'46.5"N 18°24'19.8"E	70	-	Artisanal fishers - Set nylon trammel net	Coralligenous	Argyrotheca cuneata
C	2	2016-04-13	Tricase Porto - Punta Destra	39°55'34.2"N 18°23'46.2"E	0	14	Free diving - Visual collection technique & Substrate Sampling	Rocky	Pachygrapsus marmoratus
C	3	2016-04-14	Tricase Porto - Pool	39°55'51.1"N 18°23'44.9"E	0-1	15	Free diving - Visual collection technique & Substrate Sampling	Rocky	Palaemon elegans
C	5	2016-04-14	Tricase Porto - Pool	39°55'51.1"N 18°23'44.9"E	0-1	15	Free diving - Visual collection technique & Substrate Sampling	Rocky	Clibanarius erythropus
C	6	2016-04-14	Tricase Porto - Punta Destra	39°55'34.2"N 18°23'46.2"E	5	14	Free diving - Visual collection technique & Substrate Sampling	Rocky	Pseudoprotella phasma
C	7	2016-04-14	Tricase Porto - Punta Destra	39°55'34.2"N 18°23'46.2"E	5	15	Free diving - Visual collection technique & Substrate Sampling	Rocky	Phtisica marina		about 2cm
C	8	2016-04-20	Tricase Porto - Punta Destra	39°55'34.2"N 18°23'46.2"E	5	15	Free diving - Visual collection technique & Substrate Sampling	Rocky	Caprella ind		very common in barren grounds
C	11	2016-04-23	Tricase Porto - Avamposto	39°55'45.1"N 18°23'45.4"E	2	2	Free diving - Visual collection technique & Substrate Sampling	Rocky	Jassa marmorata
C	12	2016-04-23	Tricase Porto - Avamposto	39°55'45.1"N 18°23'45.4"E	3	16	Free diving - Visual collection technique & Substrate Sampling	Rocky	Caprella ind
C	13	2016-04-26	Tricase Porto - Avamposto	39°55'45.1"N 18°23'45.4"E	0-5	15	Free diving - Visual collection technique & Substrate Sampling	Pelagic	Phronima sedentaria
C	14	2016-04-29	Tricase Area	39°55'46.5"N 18°24'19.8"E	-	-	Artisanal fishers - Set nylon trammel net	Coralligenous	Dardanus calidus
C	16	2016-05-10	Tricase Area	39°55'46.5"N 18°24'19.8"E	-	-	Artisanal fishers	Parassite	Gnathia ind		At the entrance of a cave
C	17	2016-05-19	Tricase Area	39°55'46.5"N 18°24'19.8"E	60-70	-	Artisanal fishers - Set nylon trammel net	-	Pilumnus spinifer	Eggs (V)	On algal turf
C	18	2016-05-19	Tricase Area	39°55'46.5"N 18°24'19.8"E	60-70	-	Artisanal fishers - Set nylon trammel net	-	Pisa cf. armata
C	19	2016-05-21	Tricase Area	39°55'46.5"N 18°24'19.8"E	60	-	Artisanal fishers - Set nylon trammel net	Soft bottom: mud	Squilla mantis
C	20	2016-05-21	Tricase Area	39°55'46.5"N 18°24'19.8"E	60	-	Artisanal fishers - Set nylon trammel net	Soft bottom: mud	Medorippe lanata
C	21	2016-05-21	Tricase Area	39°55'46.5"N 18°24'19.8"E	60	-	Artisanal fishers - Set nylon trammel net	Soft bottom: mud	Goneplax rhomboides
C	22	2016-05-21	Tricase Area	39°55'46.5"N 18°24'19.8"E	60	-	Artisanal fishers - Set nylon trammel net	Soft bottom: mud	Homola barbata
C	23	2016-05-24	Marina Serra Area	39°54'25.4"N 18°23'57.5"E	-	-	Artisanal fishers - Set monofilament gillnet	-	Macropodia ind
C	24	2016-05-24	Marina Serra Area	39°54'25.4"N 18°23'57.5"E	-	-	Artisanal fishers - Set monofilament gillnet	-	Calappa granulata
C	25	2016-05-25	Tricase Porto - Avamposto	39°55'45.1"N 18°23'45.4"E	0	-	Free diving - Visual collection technique & Substrate Sampling	Rocky	Ligia italica
C	26	2016-05-25	Tricase Porto - Avamposto	39°55'45.1"N 18°23'45.4"E	0	-	Free diving - Visual collection technique & Substrate Sampling	Rocky	Acanthonyx lunulatus
C	27	2016-05-26	Tricase Area	39°55'46.5"N 18°24'19.8"E	-	-	Artisanal fishers - Set nylon trammel net	Coralligenous	Paguristes eremita
C	28	2016-05-26	Tricase Area	39°55'46.5"N 18°24'19.8"E	0	-	Free diving - Visual collection technique & Substrate Sampling	Floating objects	Idotea metallica
C	29	2016-06-08	Tricase Area	39°55'46.5"N 18°24'19.8"E	-	-	Artisanal fishers	-	Alpheus dentipes	Eggs (VI)
C	30	2016-06-08	Tricase Area	39°55'46.5"N 18°24'19.8"E	-	-	Artisanal fishers	-	Galathea ind
C	31	2016-06-08	Tricase Area	39°55'46.5"N 18°24'19.8"E	-	-	Artisanal fishers	-	Pagurus anachoretus
C	32	2016-06-08	Tricase Area	39°55'46.5"N 18°24'19.8"E	-	-	Artisanal fishers	-	Maja crispata
C	34	2016-06-05	Tricase Porto - Avamposto	39°55'45.1"N 18°23'45.4"E	-	-	Free diving - Visual collection technique & Substrate Sampling	Floating objects	Palaemon cf. serratus	Eggs (VI)
C	35	2016-06-05	Tricase Porto - Avamposto	39°55'45.1"N 18°23'45.4"E	-	-	Free diving - Visual collection technique & Substrate Sampling	Floating objects	Idotea metallica
C	38	2016-06-11	Tricase Porto - Avamposto	39°55'45.1"N 18°23'45.4"E	0	19	Free diving - Visual collection technique & Substrate Sampling	Floating objects	Lepas (Anatifa) pectinata
C	39	2016-06-15	Tricase Area	39°55'46.5"N 18°24'19.8"E	50	-	Artisanal fishers - Set nylon trammel net	Coralligenous	Calappa granulata
C	40	2016-06-15	Tricase Area	39°55'46.5"N 18°24'19.8"E	50	-	Artisanal fishers - Set nylon trammel net	Coralligenous	Pilumnus hirtellus
C	42	2016-06-17	Tricase Area	39°55'46.5"N 18°24'19.8"E	-	-	Artisanal fishers	Soft bottom: sand	Portunus hastatus
C	43	2016-06-22	Funnuvojere	39°53'11.1"N 18°23'56.3"E	60-70	-	Artisanal fishers - Set nylon trammel net	Coralligenous rubble	Galathea ind
C	44	2016-06-22	Funnuvojere	39°53'11.1"N 18°23'56.3"E	60-70	-	Artisanal fishers - Set nylon trammel net	Coralligenous rubble	Pisa cf. nodipes
C	45	2016-06-22	Funnuvojere	39°53'11.1"N 18°23'56.3"E	60-70	-	Artisanal fishers - Set nylon trammel net	Coralligenous rubble	Scyllarides latus	Eggs (VI)
C	46	2016-06-25	Tricase Area	39°55'46.5"N 18°24'19.8"E	-	-	Artisanal fishers	Rocky	Maja squinado
C	47	2016-06-26	Tricase Porto - Avamposto	39°55'45.1"N 18°23'45.4"E	1	22	Free diving - Photographic sampling	Rocky	Calcinus tubularis
C	48	2016-05-01	Tricase Area	39°55'46.5"N 18°24'19.8"E	-	-	Artisanal fishers - Set nylon trammel net	-	Synalpheus gambarelloides
C	49	2016-05-01	Tricase Area	39°55'46.5"N 18°24'19.8"E	70	-	Artisanal fishers - Set nylon trammel net	-	Dardanus arrosor
C	50	2016-05-01	Tricase Area	39°55'46.5"N 18°24'19.8"E	-	-	-	-	Cestopagurus timidus
C	51	2016-05-01	Tricase Area	39°55'46.5"N 18°24'19.8"E	50	-	Artisanal fishers - Set nylon trammel net	-	Dromia personata
C	52	2016-06-28	Tricase Porto - Breakwater	39°55'53.0"N 18°23'47.4"E	1	24	Free diving - Photographic sampling	Rocky	Percnon gibbesi
C	53	2016-05-01	Marina Serra Area	39°54'25.4"N 18°23'57.5"E	20	-	Artisanal fishers - Set nylon trammel net	-	Penaeus kerathurus
C	54	2016-05-01	Tricase Area	39°55'46.5"N 18°24'19.8"E	70	-	Artisanal fishers - Set nylon trammel net	-	Palinurus elephas
C	55	2016-07-06	Tricase Porto - Avamposto	39°55'45.1"N 18°23'45.4"E	0-2	24	Free diving - Photographic sampling	Rocky	Eriphia verrucosa
C	56	2016-06-19	Tricase Porto - L'isola	39°56'49.9"N 18°24'06.8"E	20	-	Artisanal fishers - Set nylon trammel net	Coralligenous	Macropodia ind
C	57	2016-07-29	Tricase Porto - New Marina	39°55'54.1"N 18°23'45.7"E	1	-	Free diving - Visual collection technique & Substrate Sampling	Rocky	Sacculina ind
C	58	2016-08-05	Tricase Porto - Avamposto	39°55'45.1"N 18°23'45.4"E	0	-	Free diving - Visual collection technique & Substrate Sampling	Rocky	Xantho poressa
C	59	2016-08-05	Tricase Area	39°55'46.5"N 18°24'19.8"E	0	-	Citizen science - Collection	Floating objects	Liocarcinus sp.
C	60	2016-08-09	Tricase Area	39°55'46.5"N 18°24'19.8"E	70	-	Artisanal fishers - Set nylon trammel net	-	Spinolambrus macrochelos
C	61	2016-08-05	Tricase Area	39°55'46.5"N 18°24'19.8"E	0	-	Citizen science - Collection	Floating objects	Portunus hastatus
C	62	2016-08-10	Tricase Porto - L'isola	39°56'49.9"N 18°24'06.8"E	10-20	-	SCUBA diving - Photographic sampling	Rocky	Pilumnus villosissimus
C	64	2016-08-18	Tricase Porto - the beach	39°56'02.1"N 18°23'46.4"E	-	-	Citizen science - Collection	-	Callinectes sapidus
C	65	2016-09-10	Tricase Area	39°55'46.5"N 18°24'19.8"E	0	-	Free diving - Visual collection technique & Substrate Sampling	Rocky	Liocarcinus sp.
C	67	2016-09-16	Tricase Area	39°55'46.5"N 18°24'19.8"E	-	-	Local Fish market	Parassite	Pennella ind
C	68	2016-09-16	Tricase Area	39°55'46.5"N 18°24'19.8"E	-	-	Local Fish market	Parassite	Pennella ind
C	69	2016-09-16	Tricase Area	39°55'46.5"N 18°24'19.8"E	0	-	Kayak - Visual collection technique & Substrate Sampling	Floating objects	Liocarcinus vernalis
C	70	2016-09-21	Marina Serra - Matrona Cave	39°54'20.6"N 18°23'26.2"E	4	-	SCUBA diving - Photographic sampling	Cave	Herbstia condyliata
C	71	2016-09-21	Marina Serra - Matrona Cave	39°54'20.6"N 18°23'26.2"E	4	-	SCUBA diving - Visual collection technique & Substrate Sampling	Cave	Xantho sp.
C	72	2016-09-25	Tricase Porto - Avamposto	39°55'45.1"N 18°23'45.4"E	8	-	SCUBA diving - Visual collection technique & Substrate Sampling	Soft bottom: sand	Xantho granulicarpus
C	73	2016-09-26	Guardiola caves	39°51'59.9"N 18°23'42.4"E	5	-	SCUBA diving - Visual collection technique & Substrate Sampling	Cave	Paractaea monodi
C	74	2016-09-26	Guardiola caves	39°51'59.9"N 18°23'42.4"E	5	-	SCUBA diving - Visual collection technique & Substrate Sampling	Cave	Brachycarpus biunguiculatus
C	75	2016-09-26	Guardiola caves	39°51'59.9"N 18°23'42.4"E	5	-	SCUBA diving - Visual collection technique & Substrate Sampling	Cave	Dromia personata
C	76	2016-09-26	Guardiola caves	39°51'59.9"N 18°23'42.4"E	5	-	SCUBA diving - Visual collection technique & Substrate Sampling	Cave	Herbstia condyliata
C	77	2016-09-25	Tricase Porto - Avamposto	39°55'45.1"N 18°23'45.4"E	7	-	SCUBA diving - Visual collection technique & Substrate Sampling	Soft bottom: sand	Diogenes pugilator complex
C	78	2016-09-28	Marina Serra Area	39°54'25.4"N 18°23'57.5"E	3	-	Free diving - Visual collection technique & Substrate Sampling	Rocky	Processa ind
C	79	2016-09-28	Tricase Porto - Avamposto	39°55'45.1"N 18°23'45.4"E	7	-	SCUBA diving - Visual collection technique & Substrate Sampling	Soft bottom: sand	Ilia nucleus
C	80	2016-09-30	Tricase Porto - Rio	39°55'10.5"N 18°23'39.5"E	25	-	SCUBA diving - Photographic sampling	Soft bottom: sand	Ebalia edwardsii		Only found near artificial reefs of Tricase Marina. Only found since 2010-2013
C	81	2016-09-30	Tricase Area	39°55'46.5"N 18°24'19.8"E	-	-	Artisanal fishers	-	Pilumnus spinifer
C	84	2016-09-25	Tricase Porto - Avamposto	39°55'45.1"N 18°23'45.4"E	10	-	SCUBA diving - Photographic sampling	Endobiont	Pontonia pinnophylax		on coralligenous formations. Two specimens
C	85	2016-09-28	Tricase Porto - Avamposto	39°55'45.1"N 18°23'45.4"E	7	-	SCUBA diving - Photographic sampling	Soft bottom: sand	Portunus hastatus		Very abundant in Sep-Oct
C	86	2016-10-04	Tricase Porto - Avamposto	39°55'45.1"N 18°23'45.4"E	7	-	Free diving - Visual collection technique & Substrate Sampling	Soft bottom: sand	Portunus hastatus
C	87	2016-09-14	Tricase Porto - Breakwater	39°55'53.0"N 18°23'47.4"E	5	-	SCUBA diving - Photographic sampling	Artificial breakwater	Galathea squamifera
C	89	2017-07-22	Tricase Porto - Avamposto	39°55'45.1"N 18°23'45.4"E	3	-	SCUBA diving - Photographic sampling	Rocky	Stenopus spinosus		Many mature individuals up to 20cm
C	91	2017-08-13	Tricase Porto - Avamposto	39°55'45.1"N 18°23'45.4"E	7	-	Citizen science - Collection	Soft bottom: sand	Xaiva biguttata
C	92	2017-08-23	Tricase Area	39°55'46.5"N 18°24'19.8"E	-	-	Artisanal fishers	-	Neomaja goltziana
CE	1	2016-08-25	Tricase Porto - Avamposto	39°55'45.1"N 18°23'45.4"E	7	-	Detritus sampling	Epibiont	Branchiostoma lanceolatum		on floating plastic
CT	1	2016-04-26	Tricase Porto - Avamposto	39°55'45.1"N 18°23'45.4"E	3	15	Free diving - Visual collection technique & Substrate Sampling	Pelagic	Lampea pancerina	Occurrence (IV)
CT	2	2016-04-26	Tricase Porto - Avamposto	39°55'45.1"N 18°23'45.4"E	0-3	15	Free diving - Visual collection technique & Substrate Sampling	Pelagic	Leucothea multicornis		In Myriapora
CT	3	2016-05-08	Tricase Porto - Avamposto	39°55'45.1"N 18°23'45.4"E	3	18	Free diving - Visual collection technique & Substrate Sampling	Pelagic	Cestum veneris	Occurrence (V)
CT	4	2016-06-27	Tricase Porto - Avamposto	39°55'45.1"N 18°23'45.4"E	0-5	24	Free diving - Photographic sampling	Pelagic	Leucothea multicornis		on Aglaophenia
CT	5	2016-11-14	Tricase Porto - Avamposto	39°55'45.1"N 18°23'45.4"E	1-5	-	Free diving - Visual collection technique & Substrate Sampling	Pelagic	Mnemiopsis leidyi		feeding on Aglaophenia octodonta
E	1	2016-04-14	Tricase Porto - Pool	39°55'51.1"N 18°23'44.9"E	1	15	Free diving - Visual collection technique & Substrate Sampling	Rocky	Holothuria sp.
E	2	2016-04-15	Tricase Porto - Avamposto	39°55'45.1"N 18°23'45.4"E	3	16	Free diving - Visual collection technique & Substrate Sampling	Rocky	Marthasterias glacialis		on Acanthella acuta
E	3	2016-04-15	Tricase Porto - Avamposto	39°55'45.1"N 18°23'45.4"E	10	16	Free diving - Visual collection technique & Substrate Sampling	Rocky	Paracentrotus lividus		Sperm (XI)
E	4	2016-04-15	Tricase Porto - Avamposto	39°55'45.1"N 18°23'45.4"E	0-5	16	Free diving - Visual collection technique & Substrate Sampling	Rocky	Arbacia lixula
E	5	2016-05-09	Marina Serra - Porticciolo	39°54'38.2"N 18°23'36.7"E	10	16	Free diving - Visual collection technique & Substrate Sampling	Rocky	Ophidiaster ophidianus
E	6	2016-05-09	Marina Serra - Porticciolo	39°54'38.2"N 18°23'36.7"E	8	16	Free diving - Visual collection technique & Substrate Sampling	Rocky	Sphaerechinus granularis
E	7	2016-05-15	Tricase Area	39°55'46.5"N 18°24'19.8"E	70	-	Artisanal fishers - Set nylon trammel net	-	Chaetaster longipes
E	8	2016-05-15	Tricase Area	39°55'46.5"N 18°24'19.8"E	70	-	Artisanal fishers - Set nylon trammel net	-	Cidaris cidaris
E	9	2016-05-15	Tricase Area	39°55'46.5"N 18°24'19.8"E	70	-	Artisanal fishers - Set nylon trammel net	-	Stylocidaris affinis
E	10	2016-05-15	Tricase Area	39°55'46.5"N 18°24'19.8"E	25	-	Artisanal fishers - Set nylon trammel net	Coralligenous	Hacelia attenuata
E	11	2016-05-21	Tricase Area	39°55'46.5"N 18°24'19.8"E	-	-	Artisanal fishers - Set nylon trammel net	Soft bottom: mud	Paracentrotus lividus
E	12	2016-05-21	Tricase Area	39°55'46.5"N 18°24'19.8"E	60	-	Artisanal fishers - Set nylon trammel net	Coralligenous	Echinaster (Echinaster) sepositus
E	13	2016-05-15	Tricase Area	39°55'46.5"N 18°24'19.8"E	-	-	Artisanal fishers	Coralligenous rubble	Sphaerechinus granularis		On small sabellids
E	14	2016-05-25	Marina Serra Area	39°54'25.4"N 18°23'57.5"E	10	-	Artisanal fishers - Set monofilament gillnet	-	Astropecten aranciacus		Grazed by Elisia viridis
E	15	2016-05-31	Tricase Porto - Avamposto	39°55'45.1"N 18°23'45.4"E	7	19	Free diving - Visual collection technique & Substrate Sampling	Soft bottom: sand	Holothuria (Holothuria) tubulosa
E	16	2016-05-31	Tricase Porto - Avamposto	39°55'45.1"N 18°23'45.4"E	6	19	Free diving - Visual collection technique & Substrate Sampling	Rocky	Coscinasterias tenuispina
E	17	2016-06-08	Tricase Area	39°55'46.5"N 18°24'19.8"E	45	-	Artisanal fishers	-	Peltaster placenta		Algal turf
E	18	2016-06-08	Tricase Area	39°55'46.5"N 18°24'19.8"E	50	-	Artisanal fishers	-	Ophiothrix fragilis
E	19	2016-06-15	Tricase Area	39°55'46.5"N 18°24'19.8"E	50	-	Artisanal fishers - Set nylon trammel net	Coralligenous	Centrostephanus longispinus
E	20	2016-06-15	Tricase Area	39°55'46.5"N 18°24'19.8"E	50	-	Artisanal fishers - Set nylon trammel net	Coralligenous	Echinus melo
E	21	2016-06-15	Tricase Area	39°55'46.5"N 18°24'19.8"E	50	-	Artisanal fishers - Set nylon trammel net	Coralligenous	Ophiothrix fragilis
E	22	2016-06-17	Tricase Area	39°55'46.5"N 18°24'19.8"E	45	-	Artisanal fishers	Soft bottom: sand	Antedon mediterranea		Reproductive behaviour (VI-VII)
E	23	2016-07-27	Tricase Porto - Pool	39°55'51.1"N 18°23'44.9"E	2	-	Free diving - Visual collection technique & Substrate Sampling	Rocky	Holothuria (Panningothuria) forskali		on coralligenous formations
E	24	2016-09-21	Marina Serra - Matrona Cave	39°54'20.6"N 18°23'26.2"E	4	-	SCUBA diving - Photographic sampling	Cave	Holothuria (Platyperona) sanctori		Eggs (VII)
E	25	2016-10-03	Tricase Porto - Punta Destra	39°55'34.2"N 18°23'46.2"E	18	-	SCUBA diving - Visual collection technique & Substrate Sampling	Soft bottom: sand	Echinocyamus pusillus
E	26	2016-10-09	Tricase Porto - Punta Destra	39°55'34.2"N 18°23'46.2"E	10	23	SCUBA diving - Visual collection technique & Substrate Sampling	Rocky	Ophioderma longicaudum
E	27	2017-05-03	Castro - Marevivo mussel farm	39°59'51.3"N 18°25'42.1"E	34	-	SCUBA diving - Visual collection technique & Substrate Sampling	Soft bottom: sand	Psammechinus microtuberculatus
E	28	2017-05-03	Castro - Marevivo mussel farm	39°59'51.3"N 18°25'42.1"E	34	-	SCUBA diving - Photographic sampling	Soft bottom: sand	Astropecten aranciacus
E	29	2017-05-03	Castro - Marevivo mussel farm	39°59'51.3"N 18°25'42.1"E	34	-	SCUBA diving - Photographic sampling	Soft bottom: sand	Astropecten sp.
E	30	2016-06-15	Tricase Area	39°55'46.5"N 18°24'19.8"E	50	-	Artisanal fishers - Set nylon trammel net	Coralligenous	Parastichopus regalis		on Aglaophenia octodonta (H16)
H	1	2016-04-03	Tricase Porto - Avamposto	39°55'45.1"N 18°23'45.4"E	3	-	Free diving - Visual collection technique & Substrate Sampling	Rocky	Sertularella ellisii
H	2	2016-04-03	Tricase Porto - Avamposto	39°55'45.1"N 18°23'45.4"E	3	-	Free diving - Visual collection technique & Substrate Sampling	Rocky	Obelia dichotoma
H	3	2016-04-03	Tricase Porto - Avamposto	39°55'45.1"N 18°23'45.4"E	3	-	Free diving - Visual collection technique & Substrate Sampling	Rocky	Aglaophenia octodonta	Reproductive structures (IV)
H	4	2016-04-03	Tricase Porto - Avamposto	39°55'45.1"N 18°23'45.4"E	3	-	Free diving - Visual collection technique & Substrate Sampling	Rocky	Plumularia setacea
H	5	2016-04-03	Tricase Porto - Avamposto	39°55'45.1"N 18°23'45.4"E	3	-	Free diving - Visual collection technique & Substrate Sampling	Rocky	Sertularella sp.
H	6	2016-04-03	Tricase Porto - Avamposto	39°55'45.1"N 18°23'45.4"E	3	-	Free diving - Visual collection technique & Substrate Sampling	Rocky	Plumularia setacea
H	7	2016-04-12	Tricase Porto - Avamposto	39°55'45.1"N 18°23'45.4"E	3	-	Free diving - Visual collection technique & Substrate Sampling	Rocky	Antennella secundaria
H	8	2016-04-13	Tricase Porto - Avamposto	39°55'45.1"N 18°23'45.4"E	5	14	Free diving - Visual collection technique & Substrate Sampling	Rocky	Sertularella ellisii		Only common in the marina
H	9	2016-04-13	Tricase Porto - Avamposto	39°55'45.1"N 18°23'45.4"E	5	14	Free diving - Visual collection technique & Substrate Sampling	Rocky	Sertularella ellisii
H	10	2016-04-13	Tricase Porto - Avamposto	39°55'45.1"N 18°23'45.4"E	1	14	Free diving - Visual collection technique & Substrate Sampling	Rocky	Aglaophenia octodonta	Reproductive structures (IV)
H	11	2016-04-13	Tricase Porto - Punta Destra	39°55'34.2"N 18°23'46.2"E	10	14	Free diving - Visual collection technique & Substrate Sampling	Rocky	Sertularella ellisii
H	12	2016-04-13	Tricase Porto - Punta Destra	39°55'34.2"N 18°23'46.2"E	5	14	Free diving - Visual collection technique & Substrate Sampling	Rocky	Plumularia setacea
H	14	2016-04-13	Tricase Porto - Punta Destra	39°55'34.2"N 18°23'46.2"E	3	14	Free diving - Visual collection technique & Substrate Sampling	Rocky	Halecium pusillum
H	15	2016-04-13	Tricase Porto - Punta Destra	39°55'34.2"N 18°23'46.2"E	4	14	Free diving - Visual collection technique & Substrate Sampling	Rocky	Obelia dichotoma
H	16	2016-04-14	Tricase Porto - Punta Destra	39°55'34.2"N 18°23'46.2"E	5	14	Free diving - Visual collection technique & Substrate Sampling	Rocky	Aglaophenia octodonta	Reproductive structures (IV)
H	17	2016-04-15	Tricase Porto - Avamposto	39°55'45.1"N 18°23'45.4"E	5	16	Free diving - Visual collection technique & Substrate Sampling	Rocky	Aglaophenia octodonta	Reproductive structures (IV)
H	18	2016-04-20	Tricase Porto - Punta Destra	39°55'34.2"N 18°23'46.2"E	1	15	Free diving - Visual collection technique & Substrate Sampling	Pelagic	Hippopodius hippopus	Occurrence (IV-V)
H	19	2016-04-20	Tricase Porto - Punta Destra	39°55'34.2"N 18°23'46.2"E	-	15	Free diving - Visual collection technique & Substrate Sampling	Pelagic	Hippopodius hippopus	Occurrence (IV-V)
H	21	2016-04-20	Tricase Porto - Punta Destra	39°55'34.2"N 18°23'46.2"E	5	15	Free diving - Visual collection technique & Substrate Sampling	Rocky	Aglaophenia octodonta	Reproductive structures (IV)
H	22	2016-04-23	Tricase Porto - Avamposto	39°55'45.1"N 18°23'45.4"E	2	2	Free diving - Visual collection technique & Substrate Sampling	Rocky	Aglaophenia octodonta	Reproductive structures (IV)
H	23	2016-04-20	Tricase Porto - Punta Destra	39°55'34.2"N 18°23'46.2"E	5	15	Free diving - Visual collection technique & Substrate Sampling	Rocky	Campanulariidae ind
H	24	2016-04-23	Tricase Porto - Avamposto	39°55'45.1"N 18°23'45.4"E	2	2	Free diving - Visual collection technique & Substrate Sampling	Rocky	Campanulariidae ind
H	25	2016-04-23	Tricase Porto - Avamposto	39°55'45.1"N 18°23'45.4"E	2	2	Free diving - Visual collection technique & Substrate Sampling	Rocky	Anthohebella parasitica
H	26	2016-04-26	Tricase Porto - Avamposto	39°55'45.1"N 18°23'45.4"E	2	15	Free diving - Visual collection technique & Substrate Sampling	Pelagic	Forskalia formosa	Occurrence (IV)
H	27	2016-04-26	Tricase Porto - Avamposto	39°55'45.1"N 18°23'45.4"E	0-5	15	Free diving - Visual collection technique & Substrate Sampling	Pelagic	Rosacea cymbiformis	Occurrence
H	28	2016-04-26	Tricase Porto - Avamposto	39°55'45.1"N 18°23'45.4"E	0-5	15	Free diving - Visual collection technique & Substrate Sampling	Pelagic	Nanomia bijuga	Occurrence (IV)
H	29	2016-04-26	Tricase Porto - Avamposto	39°55'45.1"N 18°23'45.4"E	0	15	Free diving - Visual collection technique & Substrate Sampling	Pelagic	Halistemma rubrum	Occurrence (IV)	Feeding on Cellaria salicornioides
H	30	2016-04-26	Tricase Porto - Avamposto	39°55'45.1"N 18°23'45.4"E	0-5	15	Free diving - Visual collection technique & Substrate Sampling	Pelagic	Aequorea forskalea	Medusa stage occurrence (IV)
H	31	2016-04-27	Tricase Porto - Avamposto	39°55'45.1"N 18°23'45.4"E	-	16	Free diving - Visual collection technique & Substrate Sampling	Pelagic	Hippopodius hippopus	Occurrence (IV-V)
H	33	2016-04-28	Tricase Porto - Avamposto	39°55'45.1"N 18°23'45.4"E	1	15	Free diving - Visual collection technique & Substrate Sampling	Pelagic	Forskalia formosa	Occurrence (IV)
H	34	2016-04-29	Tricase Porto - Avamposto	39°55'45.1"N 18°23'45.4"E	-	-	Free diving - Visual collection technique & Substrate Sampling	Pelagic	Forskalia formosa	Occurrence (IV)
H	35	2016-04-30	Tricase Porto - Avamposto	39°55'45.1"N 18°23'45.4"E	1	15	Free diving - Visual collection technique & Substrate Sampling	Pelagic	Oceania armata	Medusa stage occurrence, Eggs (IV)
H	36	2016-04-30	Tricase Area	39°55'46.5"N 18°24'19.8"E	50	-	Artisanal fishers - Set nylon trammel net	Coralligenous	Aglaophenia kirchenpaueri	Reproductive structures (IV)	Eggs (XI)
H	37	2016-04-30	Tricase Area	39°55'46.5"N 18°24'19.8"E	-	-	Artisanal fishers - Set nylon trammel net	Coralligenous	Sertularella sp.		Eggs (VI); Abundant below 50 m
H	38	2016-05-08	Tricase Porto - Avamposto	39°55'45.1"N 18°23'45.4"E	5	18	Free diving - Visual collection technique & Substrate Sampling	Pelagic	Rosacea cymbiformis	Occurrence
H	39	2016-05-09	Marina Serra - Porticciolo	39°54'38.2"N 18°23'36.7"E	11	16	SCUBA diving - Visual collection technique with Transects	Rocky	Clytia hemisphaerica
H	40	2016-05-09	Marina Serra - Porticciolo	39°54'38.2"N 18°23'36.7"E	11	16	SCUBA diving - Visual collection technique with Transects	Rocky	Aglaophenia elongata
H	41	2016-05-09	Marina Serra - Porticciolo	39°54'38.2"N 18°23'36.7"E	11	16	SCUBA diving - Visual collection technique with Transects	Rocky	Aglaophenia tubiformis	Reproductive structures (V)
H	42	2016-05-09	Marina Serra - Porticciolo	39°54'38.2"N 18°23'36.7"E	10	16	SCUBA diving - Visual collection technique with Transects	Rocky	Antennella secundaria
H	43	2016-05-09	Marina Serra - Porticciolo	39°54'38.2"N 18°23'36.7"E	3	16	SCUBA diving - Visual collection technique with Transects	Rocky	Halecium petrosum
H	44	2016-05-22	Tricase Area	39°55'46.5"N 18°24'19.8"E	60	-	Artisanal fishers	Epibiont	Campanulariidae ind
H	45	2016-05-22	Tricase Area	39°55'46.5"N 18°24'19.8"E	-	-	Artisanal fishers	Epibiont	Sertularella ellisii
H	46	2016-06-08	Tricase Area	39°55'46.5"N 18°24'19.8"E	70	-	Artisanal fishers	Epibiont	Proboscidactyla ornata	Medusa stage occurrence (VI)
H	47	2016-06-08	Tricase Area	39°55'46.5"N 18°24'19.8"E	12	-	Free diving - Visual collection technique & Substrate Sampling	Epibiont	Plumularia posidoniae
H	48	2016-06-09	Tricase Porto - Punta Destra	39°55'34.2"N 18°23'46.2"E	2	19	Free diving - Visual collection technique & Substrate Sampling	Rocky	Dynamena disticha
H	50	2016-06-08	Tricase Porto - Avamposto	39°55'45.1"N 18°23'45.4"E	0	-	Free diving - Visual collection technique & Substrate Sampling	Epibiont	Kirchenpaueria pinnata		Medusa stage occurrence (VI)
H	52	2016-06-14	Tricase Area	39°55'46.5"N 18°24'19.8"E	50	-	Artisanal fishers - Set nylon trammel net	Coralligenous	Aglaophenia elongata		On floating plastic
H	54	2016-06-17	Tricase Area	39°55'46.5"N 18°24'19.8"E	25	-	Artisanal fishers	Soft bottom: sand	Amphinema rugosum
H	55	2016-06-19	Tricase Porto - L'isola	39°56'49.9"N 18°24'06.8"E	20	-	Artisanal fishers - Set nylon trammel net	Coralligenous	Kirchenpaueria pinnata		1 male and 1 female
H	56	2016-06-19	Tricase Porto - L'isola	39°56'49.9"N 18°24'06.8"E	20	-	Artisanal fishers - Set nylon trammel net	Coralligenous	Kirchenpaueria pinnata
H	57	2016-06-19	Tricase Porto - L'isola	39°56'49.9"N 18°24'06.8"E	20	-	Artisanal fishers - Set nylon trammel net	Coralligenous	Coryne pintneri		Eggs (VI;IX)
H	58	2016-06-19	Tricase Porto - L'isola	39°56'49.9"N 18°24'06.8"E	20	-	Artisanal fishers - Set nylon trammel net	Coralligenous	Ectopleura wrighti
H	59	2016-06-22	Funnuvojere	39°53'11.1"N 18°23'56.3"E	70	-	Artisanal fishers - Set nylon trammel net	Coralligenous rubble	Synthecium evansi
H	61	2016-06-22	Funnuvojere	39°53'11.1"N 18°23'56.3"E	70	-	Artisanal fishers - Set nylon trammel net	Coralligenous rubble	Nemertesia ramosa
H	62	2016-06-22	Funnuvojere	39°53'11.1"N 18°23'56.3"E	50	-	Artisanal fishers - Set nylon trammel net	Coralligenous rubble	Sertularella mediterranea
H	63	2016-06-22	Funnuvojere	39°53'11.1"N 18°23'56.3"E	70	-	Artisanal fishers - Set nylon trammel net	Coralligenous rubble	Sertularella gayi		on Schizobrachiella sanguinea
H	64	2016-06-19	Tricase Porto - L'isola	39°56'49.9"N 18°24'06.8"E	20	-	Artisanal fishers - Set nylon trammel net	Coralligenous	Halocoryne epizoica
H	66	2016-05-01	Tricase Area	39°55'46.5"N 18°24'19.8"E	1	-	Free diving - Visual collection technique & Substrate Sampling	Rocky	Anthohebella parasitica
H	67	2016-05-01	Marina Serra Area	39°54'25.4"N 18°23'57.5"E	12	-	Artisanal fishers - Set nylon trammel net	-	Plumularia posidoniae
H	69	2016-05-01	Tricase Area	39°55'46.5"N 18°24'19.8"E	45	-	Artisanal fishers - Set nylon trammel net	-	Laodicea undulata
H	71	2016-07-26	Tricase Area	39°55'46.5"N 18°24'19.8"E	-	-	Artisanal fishers	Rocky	Clytia hemisphaerica
H	73	2016-07-26	Tricase Area	39°55'46.5"N 18°24'19.8"E	30	-	Artisanal fishers	Coralligenous	Clytia linearis
H	74	2016-07-26	Tricase Area	39°55'46.5"N 18°24'19.8"E	70	-	Artisanal fishers - Set nylon trammel net	Coralligenous	Turritopsis dohrnii	Medusa stage occurrence (VII-IX)
H	76	2016-07-26	Tricase Area	39°55'46.5"N 18°24'19.8"E	60	-	Artisanal fishers - Set nylon trammel net	Coralligenous	Coryne pintneri	Reproductive structures (VII)	On floating plastic
H	77	2016-07-26	Tricase Area	39°55'46.5"N 18°24'19.8"E	50-60	-	Artisanal fishers - Set nylon trammel net	Coralligenous	Clytia sp.
H	78	2016-07-26	Tricase Area	39°55'46.5"N 18°24'19.8"E	60	-	Artisanal fishers - Set nylon trammel net	Coralligenous	Sertularella ellisii	Reproductive structures (VI)
H	80	2016-08-03	Tricase Porto - Avamposto	39°55'45.1"N 18°23'45.4"E	0-5	-	Free diving - Visual collection technique & Substrate Sampling	Coralligenous	Sertularella sp.
H	82	2016-08-10	Tricase Porto - L'isola	39°56'49.9"N 18°24'06.8"E	20	-	SCUBA diving - Photographic sampling	Coralligenous	Eudendrium racemosum		Night dive
H	83	2016-08-10	Tricase Porto - L'isola	39°56'49.9"N 18°24'06.8"E	15	-	SCUBA diving - Photographic sampling	Rocky	Antennella siliquosa		under a cobble
H	84	2016-08-10	Tricase Porto - L'isola	39°56'49.9"N 18°24'06.8"E	10-20	-	SCUBA diving - Photographic sampling	Rocky	Turritopsis dohrnii	Medusa stage occurrence (VII-IX)
H	90	2016-08-17	Tricase Porto - Punta Destra	39°55'34.2"N 18°23'46.2"E	3	-	Free diving - Visual collection technique & Substrate Sampling	Rocky	Pennaria disticha
H	93	2016-09-13	Tricase Porto - L'isola	39°56'49.9"N 18°24'06.8"E	10	-	SCUBA diving - Visual collection technique & Substrate Sampling	Rocky	Halocoryne epizoica
H	95	2016-09-13	Tricase Porto - L'isola	39°56'49.9"N 18°24'06.8"E	10	-	SCUBA diving - Visual collection technique & Substrate Sampling	Rocky	Antennella secundaria
H	97	2016-09-14	Tricase Porto - Rio	39°55'10.5"N 18°23'39.5"E	10	-	SCUBA diving - Visual collection technique & Substrate Sampling	Rocky	Coryne pintneri
H	98	2016-09-13	Tricase Porto - L'isola	39°56'49.9"N 18°24'06.8"E	10	-	SCUBA diving - Visual collection technique & Substrate Sampling	Rocky	Rosacea cymbiformis	Occurrence	At the entrance of a cave
H	99	2016-09-13	Tricase Porto - L'isola	39°56'49.9"N 18°24'06.8"E	2	-	SCUBA diving - Visual collection technique & Substrate Sampling	Rocky	Turritopsis dohrnii	Medusa stage occurrence (VII-IX)
H	100	2016-09-13	Tricase Porto - L'isola	39°56'49.9"N 18°24'06.8"E	-	-	SCUBA diving - Visual collection technique & Substrate Sampling	Rocky	Eudendrium racemosum
H	101	2016-09-13	Tricase Porto - L'isola	39°56'49.9"N 18°24'06.8"E	-	-	SCUBA diving - Visual collection technique & Substrate Sampling	Rocky	Eudendrium racemosum
H	102	2016-09-13	Tricase Porto - L'isola	39°56'49.9"N 18°24'06.8"E	-	-	SCUBA diving - Visual collection technique & Substrate Sampling	Rocky	Eudendrium racemosum
H	103	2016-09-13	Tricase Porto - L'isola	39°56'49.9"N 18°24'06.8"E	-	-	SCUBA diving - Visual collection technique & Substrate Sampling	Rocky	Eudendrium racemosum
H	104	2016-09-13	Tricase Porto - L'isola	39°56'49.9"N 18°24'06.8"E	-	-	SCUBA diving - Visual collection technique & Substrate Sampling	Rocky	Aglaophenia sp.
H	105	2016-09-13	Tricase Porto - L'isola	39°56'49.9"N 18°24'06.8"E	11	-	SCUBA diving - Visual collection technique & Substrate Sampling	Rocky	Antennella secundaria
H	106	2016-09-14	Tricase Area	39°55'46.5"N 18°24'19.8"E	70	-	Artisanal fishers - Set nylon trammel net	-	Zanclea giancarloi
H	107	2016-09-15	Tricase Porto - Punta Destra	39°55'34.2"N 18°23'46.2"E	-	-	Free diving - Visual collection technique & Substrate Sampling	Rocky	Pennaria disticha
H	108	2016-09-15	Tricase Porto - Punta Destra	39°55'34.2"N 18°23'46.2"E	-	-	Free diving - Visual collection technique & Substrate Sampling	Rocky	Pennaria disticha
H	109	2016-09-15	Tricase Porto - Punta Destra	39°55'34.2"N 18°23'46.2"E	2	-	Free diving - Visual collection technique & Substrate Sampling	Rocky	Monotheca obliqua
H	110	2016-09-15	Tricase Porto - Punta Destra	39°55'34.2"N 18°23'46.2"E	-	-	Free diving - Visual collection technique & Substrate Sampling	Rocky	Sertularella gayi
H	111	2016-09-15	Tricase Porto - Punta Destra	39°55'34.2"N 18°23'46.2"E	-	-	Free diving - Visual collection technique & Substrate Sampling	Rocky	Sertularella sp.
H	112	2016-09-17	Marina Serra - Acqua Viva	39°54'42.7"N 18°23'39.9"E	5	-	Free diving - Visual collection technique & Substrate Sampling	Rocky	Clytia hummelincki
H	113	2016-09-17	Marina Serra - Acqua Viva	39°54'42.7"N 18°23'39.9"E	-	-	Free diving - Visual collection technique & Substrate Sampling	Rocky	Eudendrium sp.
H	114	2016-09-17	Marina Serra - Acqua Viva	39°54'42.7"N 18°23'39.9"E	-	-	Free diving - Visual collection technique & Substrate Sampling	Rocky	Rhizogeton nudus
H	115	2016-09-18	Marina Serra - Acqua Viva	39°54'42.7"N 18°23'39.9"E	-	-	Free diving - Visual collection technique & Substrate Sampling	Rocky	Eudendrium sp.
H	116	2016-09-17	Marina Serra - Acqua Viva	39°54'42.7"N 18°23'39.9"E	7	-	SCUBA diving - Photographic sampling	Pelagic	Olindias muelleri	Medusa stage occurrence (IX)
H	118	2016-09-26	Guardiola caves	39°51'59.9"N 18°23'42.4"E	5	-	SCUBA diving - Visual collection technique & Substrate Sampling	Cave	Eudendrium moulouyensis	Reproductive structures (IX)
H	121	2017-04-01	Marittima	39°58'55.7"N 18°24'45.5"E	0	-	From shore - Visual collection technique & Substrate Sampling	Rocky	Orthopyxis integra
H	122	2017-09-13	Tricase Porto - New Marina	39°55'54.1"N 18°23'45.7"E	1	-	From shore - Visual collection technique & Substrate Sampling	Fouling	Corydendrium parasiticum
H	123	2016-04-26	Tricase Porto - Punta Destra	39°55'34.2"N 18°23'46.2"E	3	-	Free diving - Visual collection technique & Substrate Sampling	Pelagic	Geryonia proboscidalis	Medusa stage occurrence (IV)
H	124	-	-	-	-	-	-	-	Caryophyllia (Caryophyllia) cf. inornata
H	125	-	-	-	-	-	-	-	Eudendrium merulum		Reproductive structures (VIII)
H	126	-	-	-	-	-	-	-	Filellum serpens
H	127	-	-	-	-	-	-	-	Scandia gigas
H	128	-	-	-	-	-	-	-	Cotylorhiza tuberculata		Pelagic polychaete
HE	1	2016-05-15	Tricase Area	39°55'46.5"N 18°24'19.8"E	70	-	Artisanal fishers - Set nylon trammel net	-	Rhabdopleura recondita
HE	2	2016-06-22	Funnuvojere	39°53'11.1"N 18°23'56.3"E	70	-	Artisanal fishers - Set nylon trammel net	Coralligenous rubble	Rhabdopleura recondita
I	1	2016-05-20	Tricase Area	39°55'46.5"N 18°24'19.8"E	0	-	Free diving - Visual collection technique & Substrate Sampling	Rocky	Anurida maritima
M	1	2016-04-13	Tricase Porto - Avamposto	39°55'45.1"N 18°23'45.4"E	2	14	Free diving - Visual collection technique & Substrate Sampling	Rocky	Conus ventricosus
M	2	2016-04-13	Tricase Porto - Punta Destra	39°55'34.2"N 18°23'46.2"E	2	14	Free diving - Visual collection technique & Substrate Sampling	Rocky	Octopus vulgaris complex
M	3	2016-04-14	Tricase Porto - Pool	39°55'51.1"N 18°23'44.9"E	50	15	Free diving - Visual collection technique & Substrate Sampling	Rocky	Hexaplex trunculus complex
M	4	2016-04-14	Tricase Porto - Pool	39°55'51.1"N 18°23'44.9"E	1	15	Free diving - Visual collection technique & Substrate Sampling	Rocky	Cerithium vulgatum complex
M	5	2016-04-20	Tricase Porto - Punta Destra	39°55'34.2"N 18°23'46.2"E	2	15	Free diving - Visual collection technique & Substrate Sampling	Rocky	Doto cf. koenneckeri
M	6	2016-04-20	Tricase Porto - Punta Destra	39°55'34.2"N 18°23'46.2"E	3	15	Free diving - Visual collection technique & Substrate Sampling	Pelagic	Carinaria lamarckii
M	7	2016-04-23	Tricase Porto - Avamposto	39°55'45.1"N 18°23'45.4"E	2	2	Free diving - Visual collection technique & Substrate Sampling	Rocky	Trinchesia caerulea
M	8	2016-04-23	Tricase Porto - Avamposto	39°55'45.1"N 18°23'45.4"E	2	2	Free diving - Visual collection technique & Substrate Sampling	Rocky	Doto cf. koenneckeri
M	9	2016-04-23	Tricase Porto - Avamposto	39°55'45.1"N 18°23'45.4"E	2	2	Free diving - Visual collection technique & Substrate Sampling	Rocky	Doto paulinae
M	12	2016-05-09	Marina Serra - Porticciolo	39°54'38.2"N 18°23'36.7"E	10	16	SCUBA diving - Visual collection technique with Transects	Rocky	Elysia viridis
M	13	2016-05-09	Marina Serra - Porticciolo	39°54'38.2"N 18°23'36.7"E	10	16	SCUBA diving - Visual collection technique with Transects	Rocky	Aplysia punctata	Reproductive behaviour (II)
M	14	2016-05-10	Tricase Area	39°55'46.5"N 18°24'19.8"E	50	-	Artisanal fishers	Epibiont	Pteria hirundo		on deep coralligenous rock
M	15	2016-05-09	Marina Serra - Porticciolo	39°54'38.2"N 18°23'36.7"E	10	16	SCUBA diving - Visual collection technique with Transects	Rocky	Bittium latreillii
M	16	2016-05-09	Marina Serra - Porticciolo	39°54'38.2"N 18°23'36.7"E	10	16	Free diving - Visual collection technique & Substrate Sampling	Rocky	Felimare villafranca
M	17	2016-05-09	Marina Serra - Porticciolo	39°54'38.2"N 18°23'36.7"E	-	16	Free diving - Visual collection technique & Substrate Sampling	Rocky	Elysia timida
M	18	2016-05-15	Tricase Area	39°55'46.5"N 18°24'19.8"E	30	-	Artisanal fishers - Set nylon trammel net	-	Sepia officinalis
M	19	2016-05-21	Tricase Area	39°55'46.5"N 18°24'19.8"E	60	-	Artisanal fishers - Set nylon trammel net	Soft bottom: mud	Tonna galea
M	20	2016-05-22	Tricase Area	39°55'46.5"N 18°24'19.8"E	30	-	Artisanal fishers - Set nylon trammel net	Pelagic	Loligo vulgaris
M	21	2016-05-24	Marina Serra Area	39°54'25.4"N 18°23'57.5"E	20	-	Artisanal fishers - Set monofilament gillnet	-	Callochiton septemvalvis
M	22	2016-05-24	Tricase Area	39°55'46.5"N 18°24'19.8"E	30	-	Artisanal fishers	-	Muricopsis cristata
M	23	2016-05-24	Marina Serra Area	39°54'25.4"N 18°23'57.5"E	30	-	Artisanal fishers - Set monofilament gillnet	-	Bolinus brandaris
M	24	2016-05-24	Tricase Area	39°55'46.5"N 18°24'19.8"E	20	-	Artisanal fishers	-	Pisania striata
M	25	2016-05-24	Tricase Area	39°55'46.5"N 18°24'19.8"E	-	-	Artisanal fishers	-	Aequipecten opercularis
M	26	2016-05-25	Tricase Porto - Avamposto	39°55'45.1"N 18°23'45.4"E	1	-	Free diving - Visual collection technique & Substrate Sampling	Rocky	Lepidochitona caprearum	Eggs (V)
M	27	2016-05-25	Tricase Porto - Avamposto	39°55'45.1"N 18°23'45.4"E	0	-	Free diving - Visual collection technique & Substrate Sampling	Rocky	Patella caerulea
M	28	2016-05-25	Tricase Area	39°55'46.5"N 18°24'19.8"E	20	-	Artisanal fishers - Set nylon trammel net	Coralligenous	Anomia ephippium		Eggs (VI); 3 males
M	29	2016-05-25	Tricase Area	39°55'46.5"N 18°24'19.8"E	20	-	Artisanal fishers - Set nylon trammel net	Coralligenous	Crepidula moulinsii		in Cerithium rupestre
M	30	2016-05-25	Tricase Porto - Avamposto	39°55'45.1"N 18°23'45.4"E	0	-	Free diving - Visual collection technique & Substrate Sampling	Rocky	Ercolania viridis
M	31	2016-05-25	Tricase Porto - Avamposto	39°55'45.1"N 18°23'45.4"E	0	-	Free diving - Visual collection technique & Substrate Sampling	Rocky	Phorcus turbinatus
M	32	2016-05-25	Marina Serra Area	39°54'25.4"N 18°23'57.5"E	10	-	Artisanal fishers - Set monofilament gillnet	-	Monoplex corrugatus
M	33	2016-05-25	Tricase Porto - Punta Destra	39°55'34.2"N 18°23'46.2"E	0	-	Free diving - Visual collection technique & Substrate Sampling	Rocky	Stramonita haemastoma
M	34	2016-05-26	Tricase Area	39°55'46.5"N 18°24'19.8"E	70	-	Artisanal fishers - Set nylon trammel net	Coralligenous	Kaloplocamus ramosus		Parassites of Sarpa salpa or Diplodus vulgaris. Juvanile
M	35	2016-05-31	Tricase Area	39°55'46.5"N 18°24'19.8"E	-	-	Free diving - Visual collection technique & Substrate Sampling	Rocky	Rhyssoplax olivacea
M	36	2016-05-31	Tricase Porto - Avamposto	39°55'45.1"N 18°23'45.4"E	7	19	Free diving - Visual collection technique & Substrate Sampling	Rocky	Elysia timida
M	37	2016-05-01	Tricase Area	39°55'46.5"N 18°24'19.8"E	70	-	Artisanal fishers - Set nylon trammel net	-	Onchidorididae ind
M	38	2016-06-08	Tricase Area	39°55'46.5"N 18°24'19.8"E	2	-	Free diving - Visual collection technique & Substrate Sampling	Rocky	Haliotis tuberculata
M	39	2016-06-08	Tricase Area	39°55'46.5"N 18°24'19.8"E	2	-	Free diving - Visual collection technique & Substrate Sampling	Rocky	Aplysia depilans	Reproductive behaviour (IX)
M	40	2016-06-08	Tricase Area	39°55'46.5"N 18°24'19.8"E	18	-	Citizen science - Collection	-	Felimare picta
M	42	2016-06-08	Tricase Area	39°55'46.5"N 18°24'19.8"E	-	-	Artisanal fishers	-	Semicassis undulata
M	43	2016-06-09	Tricase Porto - Punta Destra	39°55'34.2"N 18°23'46.2"E	2	19	Free diving - Visual collection technique & Substrate Sampling	Rocky	Rocellaria dubia
M	44	2016-06-09	Tricase Porto - Punta Destra	39°55'34.2"N 18°23'46.2"E	2	19	Free diving - Visual collection technique & Substrate Sampling	Rocky	Runcina cf. brenkoae
M	45	2016-06-14	Tricase Area	39°55'46.5"N 18°24'19.8"E	-	-	Artisanal fishers - Set nylon trammel net	Coralligenous	Callochiton septemvalvis
M	46	2016-06-11	Tricase Porto - Avamposto	39°55'45.1"N 18°23'45.4"E	0	19	Free diving - Visual collection technique & Substrate Sampling	Floating objects	Doto pygmaea
M	47	2016-06-14	Tricase Area	39°55'46.5"N 18°24'19.8"E	22	-	Artisanal fishers - Set nylon trammel net	Coralligenous	Peltodoris atromaculata	Eggs (VI)
M	48	2016-06-14	Tricase Area	39°55'46.5"N 18°24'19.8"E	-	-	Artisanal fishers - Set nylon trammel net	Coralligenous	Euthria cornea
M	49	2016-06-15	Tricase Area	39°55'46.5"N 18°24'19.8"E	50	-	Artisanal fishers - Set nylon trammel net	Coralligenous	Palliolum incomparabile
M	50	2016-06-14	Tricase Area	39°55'46.5"N 18°24'19.8"E	30	-	Artisanal fishers - Set nylon trammel net	Coralligenous	Spondylus gaederopus		on floating Cystoseira barbata
M	51	2016-06-15	Tricase Area	39°55'46.5"N 18°24'19.8"E	50	-	Artisanal fishers - Set nylon trammel net	Coralligenous	Striarca lactea		on floating Cystoseira barbata
M	52	2016-06-15	Tricase Area	39°55'46.5"N 18°24'19.8"E	50	-	Artisanal fishers - Set nylon trammel net	Coralligenous	Calyptraea chinensis		Eggs (20/02/2017)
M	53	2016-06-15	Tricase Area	39°55'46.5"N 18°24'19.8"E	50	-	Artisanal fishers - Set nylon trammel net	Coralligenous	Hirtomurex squamosus
M	54	2016-06-17	Tricase Area	39°55'46.5"N 18°24'19.8"E	-	-	Artisanal fishers	Soft bottom: sand	Bolma rugosa
M	55	2016-06-17	Tricase Area	39°55'46.5"N 18°24'19.8"E	-	-	Artisanal fishers	Soft bottom: sand	Pecten jacobaeus
M	56	2016-06-19	Tricase Porto - L'isola	39°56'49.9"N 18°24'06.8"E	20	-	Artisanal fishers - Set nylon trammel net	Coralligenous	Runcina cf. ornata
M	57	2016-06-19	Tricase Porto - L'isola	39°56'49.9"N 18°24'06.8"E	20	-	Artisanal fishers - Set nylon trammel net	Coralligenous	Runcina adriatica
M	58	2016-06-19	Tricase Porto - L'isola	39°56'49.9"N 18°24'06.8"E	20	-	Artisanal fishers - Set nylon trammel net	Coralligenous	Acanthochitona fascicularis
M	59	2016-06-19	Tricase Porto - L'isola	39°56'49.9"N 18°24'06.8"E	20	-	Artisanal fishers - Set nylon trammel net	Coralligenous	Cerithium vulgatum complex
M	60	2016-06-19	Tricase Porto - L'isola	39°56'49.9"N 18°24'06.8"E	20	-	Artisanal fishers - Set nylon trammel net	Coralligenous	Arca noae		Eggs (VIII)
M	61	2016-06-17	Tricase Area	39°55'46.5"N 18°24'19.8"E	20	-	Artisanal fishers	Soft bottom: sand	Aequipecten opercularis
M	62	2016-06-17	Tricase Area	39°55'46.5"N 18°24'19.8"E	-	-	Artisanal fishers	Epibiont	Anomia ephippium
M	63	2016-06-17	Tricase Area	39°55'46.5"N 18°24'19.8"E	1	-	Free diving - Visual collection technique & Substrate Sampling	Soft bottom: sand	Tritia incrassata complex
M	64	2016-06-21	Tricase Porto - Pool	39°55'51.1"N 18°23'44.9"E	1	-	Citizen science - Collection	Rocky	Tritia corniculum complex
M	65	2016-06-21	Tricase Porto - Pool	39°55'51.1"N 18°23'44.9"E	1	-	Citizen science - Collection	Rocky	Jujubinus striatus complex
M	67	2016-06-23	Tricase Porto - Pool	39°55'51.1"N 18°23'44.9"E	1	-	Citizen science - Collection	Rocky	Cerithium lividulum
M	68	2016-06-22	Funnuvojere	39°53'11.1"N 18°23'56.3"E	60	-	Artisanal fishers - Set nylon trammel net	Coralligenous rubble	Calliostoma conulus
M	69	2016-06-22	Funnuvojere	39°53'11.1"N 18°23'56.3"E	60	-	Artisanal fishers - Set nylon trammel net	Coralligenous rubble	Pitar mediterraneus
M	71	2016-05-28	Tricase Area	39°55'46.5"N 18°24'19.8"E	0	-	Free diving - Visual collection technique & Substrate Sampling	Rocky	Melarhaphe neritoides
M	72	2016-05-28	Tricase Porto - Avamposto	39°55'45.1"N 18°23'45.4"E	10	-	Free diving - Visual collection technique & Substrate Sampling	Rocky	Rhyssoplax olivacea
M	73	2016-05-01	Tricase Area	39°55'46.5"N 18°24'19.8"E	-	-	-	-	Aplus dorbignyi complex
M	75	2016-07-06	Tricase Porto - Avamposto	39°55'45.1"N 18°23'45.4"E	11	24	Free diving - Photographic sampling	Rocky	Pinna nobilis
M	76	2016-07-02	Tricase Porto - Avamposto	39°55'45.1"N 18°23'45.4"E	3	24	Free diving - Photographic sampling	Rocky	Aplysia fasciata	Reproductive behaviour (VII)
M	77	2016-06-21	Tricase Area	39°55'46.5"N 18°24'19.8"E	-	-	Citizen science - Collection	Rocky	Episcomitra zonata
M	78	2016-07-27	Tricase Porto - Avamposto	39°55'45.1"N 18°23'45.4"E	0	-	Free diving - Visual collection technique & Substrate Sampling	Floating objects	Doto pygmaea	Eggs (VII)
M	79	2016-06-08	Tricase Porto - Avamposto	39°55'45.1"N 18°23'45.4"E	1	-	Citizen science - Collection	Rocky	Tarantinaea lignaria		Parassite of Thunnus thynnus
M	79B	2016-07-29	Tricase Porto - New Marina	39°55'54.1"N 18°23'45.7"E	1	-	Free diving - Visual collection technique & Substrate Sampling	Rocky	Haminoea ind
M	82	2016-06-08	Tricase Porto - Avamposto	39°55'45.1"N 18°23'45.4"E	1	-	Free diving - Visual collection technique & Substrate Sampling	Rocky	Cerithium vulgatum complex
M	83	2016-07-28	Tricase Area	39°55'46.5"N 18°24'19.8"E	70	-	Artisanal fishers - Set nylon trammel net	Coralligenous	Thylacodes arenarius
M	85	2016-08-18	Tricase Porto - the beach	39°56'02.1"N 18°23'46.4"E	-	-	Citizen science - Collection	-	Conus ventricosus
M	87	2016-08-18	Tricase Porto - the beach	39°56'02.1"N 18°23'46.4"E	-	-	Citizen science - Collection	-	Cerithium renovatum complex
M	88	2016-08-17	Tricase Porto - Punta Destra	39°55'34.2"N 18°23'46.2"E	1	-	Free diving - Visual collection technique & Substrate Sampling	Rocky	Hiatella arctica		In a hoveranging at the edge of a small cliff, near sand. Only one colony found
M	89	2016-08-17	Tricase Porto - Punta Destra	39°55'34.2"N 18°23'46.2"E	1	-	Free diving - Photographic sampling	Rocky	Calmella cavolini		Polips
M	90	2016-08-17	Tricase Porto - Punta Destra	39°55'34.2"N 18°23'46.2"E	-	-	Free diving - Visual collection technique & Substrate Sampling	Rocky	Dendropoma petraeum complex
M	91	2016-08-09	Tricase Porto - Porto Vecchio	39°55'59.7"N 18°23'45.8"E	1	-	Citizen science - Collection	Rocky	Umbraculum umbraculum		Occurrence (IV-V)
M	92	2016-08-10	Tricase Porto - L'isola	39°56'49.9"N 18°24'06.8"E	2	26	SCUBA diving - Photographic sampling	Rocky	Lithophaga lithophaga		Thousands of specimens
M	95	2016-09-13	Tricase Porto - L'isola	39°56'49.9"N 18°24'06.8"E	14	-	SCUBA diving - Photographic sampling	Rocky	Felimare tricolor
M	96	2016-09-13	Tricase Porto - L'isola	39°56'49.9"N 18°24'06.8"E	25	-	SCUBA diving - Photographic sampling	Epibiont	Cratena peregrina		on bivalve
M	97	2016-09-13	Tricase Porto - L'isola	39°56'49.9"N 18°24'06.8"E	7	-	SCUBA diving - Photographic sampling	Rocky	Thuridilla hopei
M	98	2016-09-14	Tricase Porto - Rio	39°55'10.5"N 18°23'39.5"E	23	-	SCUBA diving - Photographic sampling	Coralligenous	Phyllidia flava
M	100	2016-09-12	Tricase Porto - Porticeddu	39°55'27.5"N 18°23'45.7"E	1	-	SCUBA diving - Photographic sampling	Rocky	Tritonia manicata
M	102	2016-09-13	Tricase Porto - L'isola	39°56'49.9"N 18°24'06.8"E	10	-	SCUBA diving - Visual collection technique & Substrate Sampling	Soft bottom: sand	Papillicardium papillosum
M	104	2016-09-21	Marina Serra - Matrona Cave	39°54'20.6"N 18°23'26.2"E	4	-	SCUBA diving - Photographic sampling	Cave	Luria lurida lurida
M	105	2016-09-21	Marina Serra - Matrona Cave	39°54'20.6"N 18°23'26.2"E	4	-	SCUBA diving - Photographic sampling	Cave	Calliostoma conulus
M	111	2016-09-21	Marina Serra - Matrona Cave	39°54'20.6"N 18°23'26.2"E	4	-	SCUBA diving - Visual collection technique & Substrate Sampling	Cave	Neopycnodonte cochlear
M	114	2016-09-21	Marina Serra - Matrona Cave	39°54'20.6"N 18°23'26.2"E	4	-	SCUBA diving - Visual collection technique & Substrate Sampling	Cave	Lima lima
M	115	2016-09-25	Tricase Porto - Avamposto	39°55'45.1"N 18°23'45.4"E	10	-	SCUBA diving - Visual collection technique & Substrate Sampling	Soft bottom: sand	Mimachlamys varia
M	117	2016-09-26	Guardiola caves	39°51'59.9"N 18°23'42.4"E	10	-	SCUBA diving - Visual collection technique & Substrate Sampling	Cave	Rhyssoplax olivacea
M	120	2016-09-26	Guardiola caves	39°51'59.9"N 18°23'42.4"E	-	-	SCUBA diving - Visual collection technique & Substrate Sampling	Cave	Anomia ephippium
M	121	2016-09-26	Guardiola caves	39°51'59.9"N 18°23'42.4"E	5	-	SCUBA diving - Visual collection technique & Substrate Sampling	Cave	Tritia pellucida
M	122	2016-09-26	Guardiola caves	39°51'59.9"N 18°23'42.4"E	5	-	SCUBA diving - Visual collection technique & Substrate Sampling	Cave	Limaria tuberculata
M	124	2016-09-28	Marina Serra Area	39°54'25.4"N 18°23'57.5"E	3	-	Free diving - Visual collection technique & Substrate Sampling	Rocky	Steromphala nebulosa
M	125	2016-09-28	Marina Serra Area	39°54'25.4"N 18°23'57.5"E	5	-	Free diving - Visual collection technique & Substrate Sampling	Rocky	Rocellaria dubia
M	126	2016-10-03	Tricase Porto - Punta Destra	39°55'34.2"N 18°23'46.2"E	18	-	SCUBA diving - Visual collection technique & Substrate Sampling	Soft bottom: sand	Glycymeris bimaculata
M	127	2016-10-03	Tricase Porto - Punta Destra	39°55'34.2"N 18°23'46.2"E	18	-	SCUBA diving - Visual collection technique & Substrate Sampling	Soft bottom: sand	Laevicardium crassum
M	129	2016-10-03	Tricase Porto - Punta Destra	39°55'34.2"N 18°23'46.2"E	18	-	SCUBA diving - Visual collection technique & Substrate Sampling	Soft bottom: sand	Moerella donacina
M	130	2016-10-03	Tricase Porto - Punta Destra	39°55'34.2"N 18°23'46.2"E	18	-	SCUBA diving - Visual collection technique & Substrate Sampling	Soft bottom: sand	Moerella donacina
M	132	2016-10-03	Tricase Porto - Punta Destra	39°55'34.2"N 18°23'46.2"E	18	-	SCUBA diving - Visual collection technique & Substrate Sampling	Soft bottom: sand	Moerella donacina
M	134	2016-11-07	Tricase Area	39°55'46.5"N 18°24'19.8"E	-	-	Artisanal fishers - Set nylon trammel net	-	Neopycnodonte cochlear
M	135	2017-02-23	Castro - Acquaviva Cave	39°59'28.0"N 18°24'53.3"E	4	-	SCUBA diving - Photographic sampling	Cave	Spurilla neapolitana
M	136	2017-03-22	Santa Cesarea Terme - Bortone's Cave	40°03'43.9"N 18°28'46.6"E	4	-	SCUBA diving - Photographic sampling	Cave	Facelina annulicornis
M	137	2017-03-22	Santa Cesarea Terme - Bortone's Cave	40°03'43.9"N 18°28'46.6"E	4	-	SCUBA diving - Photographic sampling	Cave	Dendrodoris grandiflora
M	138	2017-03-22	Santa Cesarea Terme - Bortone's Cave	40°03'43.9"N 18°28'46.6"E	10	-	SCUBA diving - Photographic sampling	Cave	Flabellina affinis
M	139	2017-04-01	Marittima	39°58'55.7"N 18°24'45.5"E	1	-	From shore - Visual collection technique & Substrate Sampling	Rocky	Columbella rustica
M	140	2017-04-09	Tricase Porto - Rio	39°55'10.5"N 18°23'39.5"E	1	-	From shore - Visual collection technique & Substrate Sampling	Rocky	Diodora graeca
M	141	2017-04-24	Tricase Porto - Punta Destra	39°55'34.2"N 18°23'46.2"E	22	-	SCUBA diving - Visual collection technique & Substrate Sampling	Coralligenous	Luisella babai
M	142	2017-04-30	Ciolo Cave	39°50'39.5"N 18°23'11.4"E	3	-	SCUBA diving - Photographic sampling	Cave	Lamellaria perspicua
M	143	2017-04-30	Ciolo Cave	39°50'39.5"N 18°23'11.4"E	3	-	SCUBA diving - Photographic sampling	Cave	Emarginula sicula
M	144	2017-04-30	Ciolo Cave	39°50'39.5"N 18°23'11.4"E	4	-	SCUBA diving - Photographic sampling	Cave	Naria spurca spurca
M	146	2017-05-02	Tricase Porto - Avamposto	39°55'45.1"N 18°23'45.4"E	1	-	Free diving - Visual collection technique & Substrate Sampling	Rocky	Berghia coerulescens
M	147	2017-05-03	Castro - Marevivo mussel farm	39°59'51.3"N 18°25'42.1"E	34	-	SCUBA diving - Photographic sampling	Soft bottom: sand	Aglaja tricolorata		Night dive
M	148	2017-05-03	Castro - Marevivo mussel farm	39°59'51.3"N 18°25'42.1"E	34	-	SCUBA diving - Photographic sampling	Soft bottom: sand	Pleurobranchaea meckeli		Night dive
M	150	2017-06-12	Funnuvojere	39°53'11.1"N 18°23'56.3"E	2-5	-	Free diving - Photographic sampling	Rocky	Rocellaria dubia
M	150B	2017-05-23	Tricase Porto - Avamposto	39°55'45.1"N 18°23'45.4"E	0	-	Kayak - Visual collection technique & Substrate Sampling	Floating objects	Fiona pinnata	Eggs (V)
M	151	2017-06-12	Funnuvojere	39°53'11.1"N 18°23'56.3"E	1	-	Free diving - Photographic sampling	Rocky	Mytilus galloprovincialis
M	152	2017-06-13	Tricase Porto - Punta Destra	39°55'34.2"N 18°23'46.2"E	21	-	SCUBA diving - Visual collection technique & Substrate Sampling	Coralligenous	Bosellia mimetica	Eggs (VI)
M	153	2017-06-25	Tricase Porto - Canalone	39°55'48.0"N 18°24'01.4"E	22	-	SCUBA diving - Photographic sampling	Coralligenous	Platydoris argo		on Aglaophenia octodonta (H22)
M	155	2017-07-27	Tricase Porto - Porticeddu	39°55'27.5"N 18°23'45.7"E	11	-	SCUBA diving - Photographic sampling	Rocky	Charonia seguenzae
M	156	2017-08-06	Funnuvojere	39°53'11.1"N 18°23'56.3"E	40	-	SCUBA diving - Visual collection technique & Substrate Sampling	Coralligenous	Polycera quadrilineata
M	157	2017-08-06	Funnuvojere	39°53'11.1"N 18°23'56.3"E	39	-	SCUBA diving - Visual collection technique & Substrate Sampling	Coralligenous	Runcina adriatica
M	158	2017-08-06	Funnuvojere	39°53'11.1"N 18°23'56.3"E	40	-	SCUBA diving - Visual collection technique & Substrate Sampling	Coralligenous	Runcina ferruginea
M	160	2017-08-06	Funnuvojere	39°53'11.1"N 18°23'56.3"E	40	-	SCUBA diving - Visual collection technique & Substrate Sampling	Coralligenous	Felimida krohni		Nectophore
M	161	2017-08-06	Funnuvojere	39°53'11.1"N 18°23'56.3"E	-	-	SCUBA diving - Visual collection technique & Substrate Sampling	Rocky	Felimare tricolor
M	164	2017-08-13	Tricase Porto - Porto Vecchio	39°55'59.7"N 18°23'45.8"E	3	-	Citizen science - Collection	Soft bottom: sand	Aporrhais pespelecani
M	165	2017-08-06	Funnuvojere	39°53'11.1"N 18°23'56.3"E	40	-	SCUBA diving - Visual collection technique & Substrate Sampling	Coralligenous	Fusinus fioritae
M	167	2017-08-06	Funnuvojere	39°53'11.1"N 18°23'56.3"E	40	-	SCUBA diving - Visual collection technique & Substrate Sampling	Coralligenous	Ocinebrina cf. corallina/aegeensis		Poligastric stage
M	168	2017-08-06	Funnuvojere	39°53'11.1"N 18°23'56.3"E	40	-	SCUBA diving - Visual collection technique & Substrate Sampling	Coralligenous	Petalopoma elisabettae
M	169	2017-08-06	Funnuvojere	39°53'11.1"N 18°23'56.3"E	40	-	SCUBA diving - Visual collection technique & Substrate Sampling	Coralligenous	Spurilla neapolitana
M	172	2017-08-06	Funnuvojere	39°53'11.1"N 18°23'56.3"E	40	-	SCUBA diving - Visual collection technique & Substrate Sampling	Coralligenous	Doris ocelligera
M	173	2017-09-13	Tricase Porto - New Marina	39°55'54.1"N 18°23'45.7"E	2	-	From shore - Visual collection technique & Substrate Sampling	Fouling	Doto acuta
M	174	-	Tricase Area	39°55'46.5"N 18°24'19.8"E	10-25	-	Detritus sampling	Soft bottom: sand	Alvania hirta
M	175	-	Tricase Area	39°55'46.5"N 18°24'19.8"E	10-25	-	Detritus sampling	Soft bottom: sand	Alvania lineata
M	176	-	Tricase Area	39°55'46.5"N 18°24'19.8"E	10-25	-	Detritus sampling	Soft bottom: sand	Alvania mamillata
M	177	-	Tricase Area	39°55'46.5"N 18°24'19.8"E	10-25	-	Detritus sampling	Soft bottom: sand	Ammonicera fischeriana
M	178	-	Tricase Area	39°55'46.5"N 18°24'19.8"E	10-25	-	Detritus sampling	Soft bottom: sand	Barbatia barbata
M	179	-	Tricase Area	39°55'46.5"N 18°24'19.8"E	10-25	-	Detritus sampling	Soft bottom: sand	Bittium reticulatum
M	180	-	Tricase Area	39°55'46.5"N 18°24'19.8"E	10-25	-	Detritus sampling	Soft bottom: sand	Cardita calyculata
M	181	-	Tricase Area	39°55'46.5"N 18°24'19.8"E	10-25	-	Detritus sampling	Soft bottom: sand	Folinella excavata
M	182	-	Tricase Area	39°55'46.5"N 18°24'19.8"E	10-25	-	Detritus sampling	Soft bottom: sand	Homalopoma sanguineum
M	183	-	Tricase Area	39°55'46.5"N 18°24'19.8"E	10-25	-	Detritus sampling	Soft bottom: sand	Isara cornea
M	184	-	Tricase Area	39°55'46.5"N 18°24'19.8"E	10-25	-	Detritus sampling	Soft bottom: sand	Jujubinus exasperatus complex
M	185	-	Tricase Area	39°55'46.5"N 18°24'19.8"E	10-25	-	Detritus sampling	Soft bottom: sand	Lasaea rubra
M	186	-	Tricase Area	39°55'46.5"N 18°24'19.8"E	10-25	-	Detritus sampling	Soft bottom: sand	Manupecten pesfelis
M	187	-	Tricase Area	39°55'46.5"N 18°24'19.8"E	10-25	-	Detritus sampling	Soft bottom: sand	Manzonia crassa
M	188	-	Tricase Area	39°55'46.5"N 18°24'19.8"E	10-25	-	Detritus sampling	Soft bottom: sand	Musculus costulatus
M	189	-	Tricase Area	39°55'46.5"N 18°24'19.8"E	10-25	-	Detritus sampling	Soft bottom: sand	Omalogyra cf. simplex
M	190	-	Tricase Area	39°55'46.5"N 18°24'19.8"E	10-25	-	Detritus sampling	Soft bottom: sand	Rissoina bruguieri
M	191	-	Tricase Area	39°55'46.5"N 18°24'19.8"E	10-25	-	Detritus sampling	Soft bottom: sand	Scissurella costata
M	192	-	Tricase Area	39°55'46.5"N 18°24'19.8"E	10-25	-	Detritus sampling	Soft bottom: sand	Talochlamys multistriata
M	193	-	Tricase Area	39°55'46.5"N 18°24'19.8"E	10-25	-	Detritus sampling	Soft bottom: sand	Venus verrucosa
M	194	2017-09-16	Tricase Porto - Avamposto	39°55'45.1"N 18°23'45.4"E	30	-	SCUBA diving - Photographic sampling	Coralligenous	Diaphorodoris papillata		on Peyssonnelia sp
M	195	2017-06-07	Tricase Porto - Avamposto	39°55'45.1"N 18°23'45.4"E	0	-	Kayak - Visual collection technique & Substrate Sampling	Floating objects	Eubranchus exiguus
M	196	2017-08-06	Funnuvojere	39°53'11.1"N 18°23'56.3"E	38-45	-	SCUBA diving - Visual collection technique & Substrate Sampling	Coralligenous	Felimida luteorosea
M	197	-	-	-	-	-	-	-	Bulla striata		Eggs (VIII)
M	198	-	-	-	-	-	-	-	Patella rustica complex
M	199	-	-	-	-	-	-	-	Peronaea planata
M	200	-	-	-	-	-	-	-	Pusia tricolor
M	201	-	-	-	-	-	-	-	Weinkauffia turgidula
N	1	2016-09-16	Tricase Area	39°55'46.5"N 18°24'19.8"E	-	-	Local Fish market	Parassite	Anisakis sp.
NM	1	2017-08-01	Marina Serra - Matrona Cave	39°54'20.6"N 18°23'26.2"E	4	-	SCUBA diving - Visual collection technique & Substrate Sampling	Cave	Gibsonnemertes spectabilis
NM	2	2016-07-28	Tricase Area	39°55'46.5"N 18°24'19.8"E	70	-	Artisanal fishers - Set nylon trammel net	Coralligenous	Drepanophorus spectabilis
P	2	2016-05-15	Tricase Area	39°55'46.5"N 18°24'19.8"E	40	-	Artisanal fishers - Set nylon trammel net	Coralligenous	Petrosia (Petrosia) ficiformis
P	3	2016-05-25	Tricase Area	39°55'46.5"N 18°24'19.8"E	20	-	Artisanal fishers - Set nylon trammel net	Coralligenous	Axinella cannabina
P	4	2016-05-25	Tricase Area	39°55'46.5"N 18°24'19.8"E	20	-	Artisanal fishers - Set nylon trammel net	Coralligenous	Chondrosia reniformis		on Halimeda tuna
P	5	2016-05-25	Tricase Area	39°55'46.5"N 18°24'19.8"E	20	-	Artisanal fishers - Set nylon trammel net	Coralligenous	Axinella damicornis
P	6	2016-05-28	Tricase Area	39°55'46.5"N 18°24'19.8"E	-	-	Artisanal fishers - Set nylon trammel net	Coralligenous	Clathria (Clathria) coralloides
P	7	2016-05-28	Tricase Area	39°55'46.5"N 18°24'19.8"E	25	-	Artisanal fishers - Set nylon trammel net	Coralligenous	Axinella damicornis
P	8	2016-05-28	Tricase Area	39°55'46.5"N 18°24'19.8"E	28	-	Artisanal fishers - Set nylon trammel net	Coralligenous	Acanthella acuta
P	9	2016-06-08	Tricase Area	39°55'46.5"N 18°24'19.8"E	12	-	Free diving - Visual collection technique & Substrate Sampling	Rocky	Chondrilla nucula
P	10	2016-06-14	Tricase Area	39°55'46.5"N 18°24'19.8"E	-	-	Artisanal fishers - Set nylon trammel net	Coralligenous	Agelas oroides
P	11	2016-06-14	Tricase Area	39°55'46.5"N 18°24'19.8"E	20	-	Artisanal fishers - Set nylon trammel net	Coralligenous	Terpios gelatinosus
P	12	2016-06-22	Funnuvojere	39°53'11.1"N 18°23'56.3"E	60-70	-	Artisanal fishers - Set nylon trammel net	Coralligenous rubble	Raspailia (Raspailia) viminalis
P	13	2016-06-22	Funnuvojere	39°53'11.1"N 18°23'56.3"E	70	-	Artisanal fishers - Set nylon trammel net	Coralligenous rubble	Sycon raphanus		On Posidonia oceanica
P	14	2016-05-01	Marina Serra Area	39°54'25.4"N 18°23'57.5"E	10	-	Artisanal fishers - Set nylon trammel net	-	Ircinia variabilis
P	15	2016-07-28	Tricase Area	39°55'46.5"N 18°24'19.8"E	70	-	Artisanal fishers - Set nylon trammel net	Coralligenous	Calthropella (Corticellopsis) stelligera
P	16	2016-07-28	Tricase Area	39°55'46.5"N 18°24'19.8"E	70	-	Artisanal fishers - Set nylon trammel net	Coralligenous	Aplysina cavernicola
P	17	2016-07-28	Tricase Area	39°55'46.5"N 18°24'19.8"E	70	-	Artisanal fishers - Set nylon trammel net	Coralligenous	Clathria (Clathria) toxistricta		On Posidonia oceanica
P	18	2016-07-28	Tricase Area	39°55'46.5"N 18°24'19.8"E	40	-	Artisanal fishers - Set nylon trammel net	Coralligenous	Clathrina clathrus		On Posidonia oceanica
P	20	2016-08-10	Tricase Porto - L'isola	39°56'49.9"N 18°24'06.8"E	22	-	SCUBA diving - Photographic sampling	Coralligenous	Dictyonella obtusa
P	21	2016-08-16	Tricase Porto - Avamposto	39°55'45.1"N 18°23'45.4"E	1-10	-	Free diving - Visual collection technique & Substrate Sampling	Rocky	Oscarella cf. tuberculata
P	22	2016-08-16	Tricase Porto - Punta Destra	39°55'34.2"N 18°23'46.2"E	5	-	Free diving - Visual collection technique & Substrate Sampling	Rocky	Sarcotragus spinosulus		Parassite of Thunnus thynnus
P	23	2016-08-16	Tricase Porto - Punta Destra	39°55'34.2"N 18°23'46.2"E	5	-	Free diving - Photographic sampling	Rocky	Cliona celata
P	24	2016-09-13	Tricase Porto - L'isola	39°56'49.9"N 18°24'06.8"E	10	-	SCUBA diving - Photographic sampling	Rocky	Axinella polypoides
P	25	2016-09-14	Tricase Porto - Rio	39°55'10.5"N 18°23'39.5"E	20	-	SCUBA diving - Visual collection technique & Substrate Sampling	Coralligenous	Agelas oroides
P	26	2016-09-14	Tricase Porto - Rio	39°55'10.5"N 18°23'39.5"E	10	-	SCUBA diving - Visual collection technique & Substrate Sampling	Rocky	Aaptos aaptos
P	27	2016-09-14	Tricase Porto - Rio	39°55'10.5"N 18°23'39.5"E	10	-	SCUBA diving - Visual collection technique & Substrate Sampling	Rocky	Ircinia variabilis
P	28	2016-09-21	Marina Serra - Matrona Cave	39°54'20.6"N 18°23'26.2"E	4	-	SCUBA diving - Visual collection technique & Substrate Sampling	Cave	Aaptos aaptos
P	29	2016-09-21	Marina Serra - Matrona Cave	39°54'20.6"N 18°23'26.2"E	4	-	SCUBA diving - Visual collection technique & Substrate Sampling	Cave	Chondrosia reniformis
P	30	2016-09-21	Marina Serra - Matrona Cave	39°54'20.6"N 18°23'26.2"E	-	-	SCUBA diving - Visual collection technique & Substrate Sampling	Cave	Axinella verrucosa
P	33	2016-09-21	Marina Serra - Matrona Cave	39°54'20.6"N 18°23'26.2"E	-	-	SCUBA diving - Visual collection technique & Substrate Sampling	Cave	Acanthella acuta
P	34	2016-09-25	Tricase Porto - Avamposto	39°55'45.1"N 18°23'45.4"E	5	-	SCUBA diving - Visual collection technique & Substrate Sampling	Rocky	Sarcotragus spinosulus
P	35	2016-09-25	Tricase Porto - Avamposto	39°55'45.1"N 18°23'45.4"E	8	-	SCUBA diving - Visual collection technique & Substrate Sampling	Rocky	Chondrosia reniformis		Spawning (VII)
P	36	2016-09-25	Tricase Porto - Avamposto	39°55'45.1"N 18°23'45.4"E	5	-	SCUBA diving - Visual collection technique & Substrate Sampling	Rocky	Crambe crambe
P	37	2016-09-25	Tricase Porto - Avamposto	39°55'45.1"N 18°23'45.4"E	10	-	SCUBA diving - Visual collection technique & Substrate Sampling	Rocky	Ircinia variabilis
P	38	2016-09-25	Tricase Porto - Avamposto	39°55'45.1"N 18°23'45.4"E	6	-	SCUBA diving - Visual collection technique & Substrate Sampling	Rocky	Hemimycale columella
P	39	2016-09-26	Guardiola caves	39°51'59.9"N 18°23'42.4"E	10	-	SCUBA diving - Visual collection technique & Substrate Sampling	Cave	Dictyonella incisa
P	40	2016-09-26	Guardiola caves	39°51'59.9"N 18°23'42.4"E	8	-	SCUBA diving - Visual collection technique & Substrate Sampling	Cave	Scalarispongia scalaris
P	41	2016-09-26	Guardiola caves	39°51'59.9"N 18°23'42.4"E	5	-	SCUBA diving - Visual collection technique & Substrate Sampling	Cave	Oscarella sp.
P	42	2016-09-28	Marina Serra Area	39°54'25.4"N 18°23'57.5"E	6	-	Free diving - Visual collection technique & Substrate Sampling	Rocky	Crambe crambe
P	43	2016-09-28	Marina Serra Area	39°54'25.4"N 18°23'57.5"E	3	-	Free diving - Visual collection technique & Substrate Sampling	Rocky	Hamigera hamigera
P	44	2016-09-17	Marina Serra - Acqua Viva	39°54'42.7"N 18°23'39.9"E	10	-	Free diving - Visual collection technique & Substrate Sampling	Rocky	Cliona schmidtii
P	45	2016-10-09	Tricase Porto - Punta Destra	39°55'34.2"N 18°23'46.2"E	15	23	SCUBA diving - Visual collection technique & Substrate Sampling	Rocky	Hexadella racovitzai
P	46	2016-10-09	Tricase Porto - Punta Destra	39°55'34.2"N 18°23'46.2"E	15	23	SCUBA diving - Visual collection technique & Substrate Sampling	Rocky	Petrosia (Petrosia) ficiformis
P	47	2016-10-13	Funnuvojere	39°53'11.1"N 18°23'56.3"E	5-10	-	SCUBA diving - Visual collection technique & Substrate Sampling	Rocky	Sarcotragus foetidus
P	67	2017-06-10	Tricase Porto - Avamposto	39°55'45.1"N 18°23'45.4"E	20	-	SCUBA diving - Sampling of a coralligenous pinnacle	Coralligenous	Fasciospongia cavernosa
P	68	2017-06-10	Tricase Porto - Avamposto	39°55'45.1"N 18°23'45.4"E	20	-	SCUBA diving - Sampling of a coralligenous pinnacle	Coralligenous	Alectona millari
P	69	2017-06-10	Tricase Porto - Avamposto	39°55'45.1"N 18°23'45.4"E	20	-	SCUBA diving - Sampling of a coralligenous pinnacle	Coralligenous	Ancorina cerebrum		Eggs (VIII)
P	70	2017-06-10	Tricase Porto - Avamposto	39°55'45.1"N 18°23'45.4"E	20	-	SCUBA diving - Sampling of a coralligenous pinnacle	Coralligenous	Aplysina aerophoba		on Pachygrapsus marmoratus
P	71	2017-06-10	Tricase Porto - Avamposto	39°55'45.1"N 18°23'45.4"E	20	-	SCUBA diving - Sampling of a coralligenous pinnacle	Coralligenous	Axinyssa aurantiaca
P	72	2017-06-10	Tricase Porto - Avamposto	39°55'45.1"N 18°23'45.4"E	20	-	SCUBA diving - Sampling of a coralligenous pinnacle	Coralligenous	Bubaris carcisis
P	73	2017-06-10	Tricase Porto - Avamposto	39°55'45.1"N 18°23'45.4"E	20	-	SCUBA diving - Sampling of a coralligenous pinnacle	Coralligenous	Bubaris vermiculata		Alien
P	74	2017-06-10	Tricase Porto - Avamposto	39°55'45.1"N 18°23'45.4"E	20	-	SCUBA diving - Sampling of a coralligenous pinnacle	Coralligenous	Clathria (Clathria) toxivaria		Parassite of Thunnus thynnus
P	75	2017-06-10	Tricase Porto - Avamposto	39°55'45.1"N 18°23'45.4"E	20	-	SCUBA diving - Sampling of a coralligenous pinnacle	Coralligenous	Cliona amplicavata		Parassites of Thunnus thynnus, fixed togheter with C67
P	76	2017-06-10	Tricase Porto - Avamposto	39°55'45.1"N 18°23'45.4"E	20	-	SCUBA diving - Sampling of a coralligenous pinnacle	Coralligenous	Cliona burtoni		Granchio di grotta
P	77	2017-06-10	Tricase Porto - Avamposto	39°55'45.1"N 18°23'45.4"E	20	-	SCUBA diving - Sampling of a coralligenous pinnacle	Coralligenous	Cliona viridis
P	78	2017-06-10	Tricase Porto - Avamposto	39°55'45.1"N 18°23'45.4"E	20	-	SCUBA diving - Sampling of a coralligenous pinnacle	Coralligenous	Cliothosa hancocki
P	79	2017-06-10	Tricase Porto - Avamposto	39°55'45.1"N 18°23'45.4"E	20	-	SCUBA diving - Sampling of a coralligenous pinnacle	Coralligenous	Corticium candelabrum
P	80	2017-06-10	Tricase Porto - Avamposto	39°55'45.1"N 18°23'45.4"E	20	-	SCUBA diving - Sampling of a coralligenous pinnacle	Coralligenous	Crella sp.
P	81	2017-06-10	Tricase Porto - Avamposto	39°55'45.1"N 18°23'45.4"E	20	-	SCUBA diving - Sampling of a coralligenous pinnacle	Coralligenous	Delectona madreporica
P	82	2017-06-10	Tricase Porto - Avamposto	39°55'45.1"N 18°23'45.4"E	20	-	SCUBA diving - Sampling of a coralligenous pinnacle	Coralligenous	Dercitus (Stoeba) plicatus
P	83	2017-06-10	Tricase Porto - Avamposto	39°55'45.1"N 18°23'45.4"E	20	-	SCUBA diving - Sampling of a coralligenous pinnacle	Coralligenous	Desmanthus incrustans		in Pinna nobilis
P	84	2017-06-10	Tricase Porto - Avamposto	39°55'45.1"N 18°23'45.4"E	20	-	SCUBA diving - Sampling of a coralligenous pinnacle	Coralligenous	Didiscus stylifer		Night dive
P	85	2017-06-10	Tricase Porto - Avamposto	39°55'45.1"N 18°23'45.4"E	20	-	SCUBA diving - Sampling of a coralligenous pinnacle	Coralligenous	Diplastrella bistellata
P	86	2017-06-10	Tricase Porto - Avamposto	39°55'45.1"N 18°23'45.4"E	20	-	SCUBA diving - Sampling of a coralligenous pinnacle	Coralligenous	Diplastrella boeroi
P	87	2017-06-10	Tricase Porto - Avamposto	39°55'45.1"N 18°23'45.4"E	20	-	SCUBA diving - Sampling of a coralligenous pinnacle	Coralligenous	Dysidea avara
P	88	2017-06-10	Tricase Porto - Avamposto	39°55'45.1"N 18°23'45.4"E	20	-	SCUBA diving - Sampling of a coralligenous pinnacle	Coralligenous	Dysidea fragilis		Common but just from about 2010. Collected with Lobster trammels
P	89	2017-06-10	Tricase Porto - Avamposto	39°55'45.1"N 18°23'45.4"E	20	-	SCUBA diving - Sampling of a coralligenous pinnacle	Coralligenous	Erylus discophorus		A few specimens found in the shallow detritus
P	90	2017-06-10	Tricase Porto - Avamposto	39°55'45.1"N 18°23'45.4"E	20	-	SCUBA diving - Sampling of a coralligenous pinnacle	Coralligenous	Eurypon cinctum
P	91	2017-06-10	Tricase Porto - Avamposto	39°55'45.1"N 18°23'45.4"E	20	-	SCUBA diving - Sampling of a coralligenous pinnacle	Coralligenous	Eurypon clavatum		Occurrence (IV-IX)
P	92	2017-06-10	Tricase Porto - Avamposto	39°55'45.1"N 18°23'45.4"E	20	-	SCUBA diving - Sampling of a coralligenous pinnacle	Coralligenous	Eurypon coronula
P	93	2017-06-10	Tricase Porto - Avamposto	39°55'45.1"N 18°23'45.4"E	20	-	SCUBA diving - Sampling of a coralligenous pinnacle	Coralligenous	Eurypon gracile
P	94	2017-06-10	Tricase Porto - Avamposto	39°55'45.1"N 18°23'45.4"E	20	-	SCUBA diving - Sampling of a coralligenous pinnacle	Coralligenous	Eurypon major
P	95	2017-06-10	Tricase Porto - Avamposto	39°55'45.1"N 18°23'45.4"E	20	-	SCUBA diving - Sampling of a coralligenous pinnacle	Coralligenous	Eurypon obtusum
P	96	2017-06-10	Tricase Porto - Avamposto	39°55'45.1"N 18°23'45.4"E	20	-	SCUBA diving - Sampling of a coralligenous pinnacle	Coralligenous	Eurypon viride
P	97	2017-06-10	Tricase Porto - Avamposto	39°55'45.1"N 18°23'45.4"E	20	-	SCUBA diving - Sampling of a coralligenous pinnacle	Coralligenous	Halicnemia geniculata
P	98	2017-06-10	Tricase Porto - Avamposto	39°55'45.1"N 18°23'45.4"E	20	-	SCUBA diving - Sampling of a coralligenous pinnacle	Coralligenous	Geodia cydonium
P	99	2017-06-10	Tricase Porto - Avamposto	39°55'45.1"N 18°23'45.4"E	20	-	SCUBA diving - Sampling of a coralligenous pinnacle	Coralligenous	Halichondria (Halichondria) cf. panicea
P	100	2017-06-10	Tricase Porto - Avamposto	39°55'45.1"N 18°23'45.4"E	20	-	SCUBA diving - Sampling of a coralligenous pinnacle	Coralligenous	Hymerhabdia oxytrunca
P	101	2017-06-10	Tricase Porto - Avamposto	39°55'45.1"N 18°23'45.4"E	20	-	SCUBA diving - Sampling of a coralligenous pinnacle	Coralligenous	Jaspis incrustans
P	102	2017-06-10	Tricase Porto - Avamposto	39°55'45.1"N 18°23'45.4"E	20	-	SCUBA diving - Sampling of a coralligenous pinnacle	Coralligenous	Jaspis johnstonii
P	103	2017-06-10	Tricase Porto - Avamposto	39°55'45.1"N 18°23'45.4"E	20	-	SCUBA diving - Sampling of a coralligenous pinnacle	Coralligenous	Lissodendoryx (Anomodoryx) cavernosa
P	104	2017-06-10	Tricase Porto - Avamposto	39°55'45.1"N 18°23'45.4"E	20	-	SCUBA diving - Sampling of a coralligenous pinnacle	Coralligenous	Monocrepidium vermiculatum
P	105	2017-06-10	Tricase Porto - Avamposto	39°55'45.1"N 18°23'45.4"E	20	-	SCUBA diving - Sampling of a coralligenous pinnacle	Coralligenous	Mycale (Mycale) lingua
P	106	2017-06-10	Tricase Porto - Avamposto	39°55'45.1"N 18°23'45.4"E	20	-	SCUBA diving - Sampling of a coralligenous pinnacle	Coralligenous	Mycale (Mycale) massa
P	107	2017-06-10	Tricase Porto - Avamposto	39°55'45.1"N 18°23'45.4"E	20	-	SCUBA diving - Sampling of a coralligenous pinnacle	Coralligenous	Pachastrella monilifera
P	108	2017-06-10	Tricase Porto - Avamposto	39°55'45.1"N 18°23'45.4"E	20	-	SCUBA diving - Sampling of a coralligenous pinnacle	Coralligenous	Penares euastrum
P	109	2017-06-10	Tricase Porto - Avamposto	39°55'45.1"N 18°23'45.4"E	20	-	SCUBA diving - Sampling of a coralligenous pinnacle	Coralligenous	Penares helleri
P	110	2017-06-10	Tricase Porto - Avamposto	39°55'45.1"N 18°23'45.4"E	20	-	SCUBA diving - Sampling of a coralligenous pinnacle	Coralligenous	Petrosia (Petrosia) clavata
P	111	2017-06-10	Tricase Porto - Avamposto	39°55'45.1"N 18°23'45.4"E	20	-	SCUBA diving - Sampling of a coralligenous pinnacle	Coralligenous	Phorbas dives
P	112	2017-06-10	Tricase Porto - Avamposto	39°55'45.1"N 18°23'45.4"E	20	-	SCUBA diving - Sampling of a coralligenous pinnacle	Coralligenous	Phorbas fictitius
P	113	2017-06-10	Tricase Porto - Avamposto	39°55'45.1"N 18°23'45.4"E	20	-	SCUBA diving - Sampling of a coralligenous pinnacle	Coralligenous	Phorbas tenacior
P	114	2017-06-10	Tricase Porto - Avamposto	39°55'45.1"N 18°23'45.4"E	20	-	SCUBA diving - Sampling of a coralligenous pinnacle	Coralligenous	Plakina dilopha
P	115	2017-06-10	Tricase Porto - Avamposto	39°55'45.1"N 18°23'45.4"E	20	-	SCUBA diving - Sampling of a coralligenous pinnacle	Coralligenous	Plakina reducta
P	116	2017-06-10	Tricase Porto - Avamposto	39°55'45.1"N 18°23'45.4"E	20	-	SCUBA diving - Sampling of a coralligenous pinnacle	Coralligenous	Plakina trilopha
P	117	2017-06-10	Tricase Porto - Avamposto	39°55'45.1"N 18°23'45.4"E	20	-	SCUBA diving - Sampling of a coralligenous pinnacle	Coralligenous	Plakortis simplex
P	118	2017-06-10	Tricase Porto - Avamposto	39°55'45.1"N 18°23'45.4"E	20	-	SCUBA diving - Sampling of a coralligenous pinnacle	Coralligenous	Poecillastra compressa
P	119	2017-06-10	Tricase Porto - Avamposto	39°55'45.1"N 18°23'45.4"E	20	-	SCUBA diving - Sampling of a coralligenous pinnacle	Coralligenous	Prosuberites longispinus
P	120	2017-06-10	Tricase Porto - Avamposto	39°55'45.1"N 18°23'45.4"E	20	-	SCUBA diving - Sampling of a coralligenous pinnacle	Coralligenous	Protosuberites epiphytum
P	121	2017-06-10	Tricase Porto - Avamposto	39°55'45.1"N 18°23'45.4"E	20	-	SCUBA diving - Sampling of a coralligenous pinnacle	Coralligenous	Raspaciona aculeata
P	122	2017-06-10	Tricase Porto - Avamposto	39°55'45.1"N 18°23'45.4"E	20	-	SCUBA diving - Sampling of a coralligenous pinnacle	Coralligenous	Rhabderemia gallica
P	123	2017-06-10	Tricase Porto - Avamposto	39°55'45.1"N 18°23'45.4"E	20	-	SCUBA diving - Sampling of a coralligenous pinnacle	Coralligenous	Rhabderemia minutula
P	124	2017-06-10	Tricase Porto - Avamposto	39°55'45.1"N 18°23'45.4"E	20	-	SCUBA diving - Sampling of a coralligenous pinnacle	Coralligenous	Rhabdobaris implicata		On red algae
P	125	2017-06-10	Tricase Porto - Avamposto	39°55'45.1"N 18°23'45.4"E	20	-	SCUBA diving - Sampling of a coralligenous pinnacle	Coralligenous	Tethya aurantium
P	126	2017-06-10	Tricase Porto - Avamposto	39°55'45.1"N 18°23'45.4"E	20	-	SCUBA diving - Sampling of a coralligenous pinnacle	Coralligenous	Tethya citrina		with Caprellids living on the colony
P	127	2017-06-10	Tricase Porto - Avamposto	39°55'45.1"N 18°23'45.4"E	20	-	SCUBA diving - Sampling of a coralligenous pinnacle	Coralligenous	Tetilla sp.		with Caprellids living on the colony
P	128	2017-06-10	Tricase Porto - Avamposto	39°55'45.1"N 18°23'45.4"E	20	-	SCUBA diving - Sampling of a coralligenous pinnacle	Coralligenous	Timea stellata
P	129	2017-06-10	Tricase Porto - Avamposto	39°55'45.1"N 18°23'45.4"E	20	-	SCUBA diving - Sampling of a coralligenous pinnacle	Coralligenous	Timea unistellata
P	130	2017-06-10	Tricase Porto - Avamposto	39°55'45.1"N 18°23'45.4"E	20	-	SCUBA diving - Sampling of a coralligenous pinnacle	Coralligenous	Triptolemma simplex		on Dictyota dichotoma
P	131	2017-06-10	Tricase Porto - Avamposto	39°55'45.1"N 18°23'45.4"E	20	-	SCUBA diving - Sampling of a coralligenous pinnacle	Coralligenous	Spirastrella cunctatrix
P	132	2017-06-10	Tricase Porto - Avamposto	39°55'45.1"N 18°23'45.4"E	20	-	SCUBA diving - Sampling of a coralligenous pinnacle	Coralligenous	Spirastrella regina
P	133	2017-06-10	Tricase Porto - Avamposto	39°55'45.1"N 18°23'45.4"E	20	-	SCUBA diving - Sampling of a coralligenous pinnacle	Coralligenous	Spiroxya heteroclita		with caprellid Pseudoprotella phasma
P	134	2017-06-10	Tricase Porto - Avamposto	39°55'45.1"N 18°23'45.4"E	20	-	SCUBA diving - Sampling of a coralligenous pinnacle	Coralligenous	Spiroxya sarai
P	135	2017-06-10	Tricase Porto - Avamposto	39°55'45.1"N 18°23'45.4"E	20	-	SCUBA diving - Sampling of a coralligenous pinnacle	Coralligenous	Spongosorites intricatus		Nectophore
P	136	2017-06-10	Tricase Porto - Avamposto	39°55'45.1"N 18°23'45.4"E	20	-	SCUBA diving - Sampling of a coralligenous pinnacle	Coralligenous	Stelletta grubii
P	137	2017-06-10	Tricase Porto - Avamposto	39°55'45.1"N 18°23'45.4"E	20	-	SCUBA diving - Sampling of a coralligenous pinnacle	Coralligenous	Stelletta mediterranea		on Peyssonnelia (A21). Predate by Doto koenneckeri
P	138	2017-06-10	Tricase Porto - Avamposto	39°55'45.1"N 18°23'45.4"E	20	-	SCUBA diving - Sampling of a coralligenous pinnacle	Coralligenous	Stelletta stellata
P	139	-	-	-	5	-	SCUBA diving - Visual collection technique & Substrate Sampling	Cave	Haliclona (Reniera) mediterranea
P	140	-	-	-	5	-	SCUBA diving - Visual collection technique & Substrate Sampling	Cave	Haliclona (Rhizoniera) sarai
P	141	-	-	-	7	-	SCUBA diving - Visual collection technique & Substrate Sampling	Cave	Haliclona (Soestella) mucosa
P	142	-	-	-	5	-	SCUBA diving - Visual collection technique & Substrate Sampling	Cave	Haliclona (Soestella) valliculata
P	143	-	-	-	10	-	SCUBA diving - Visual collection technique & Substrate Sampling	Cave	Halichondria (Halichondria) contorta
P	144	-	-	-	7	-	SCUBA diving - Visual collection technique & Substrate Sampling	Cave	Oceanapia perforata
P	145	-	-	-	7	-	SCUBA diving - Visual collection technique & Substrate Sampling	Cave	Petrosia (Strongylophora) pulitzeri
P	146	-	-	-	5	-	SCUBA diving - Visual collection technique & Substrate Sampling	Cave	Petrosia (Strongylophora) vansoesti
P	147	-	-	-	10	-	SCUBA diving - Visual collection technique & Substrate Sampling	Cave	Ulosa digitata
PL	1	2016-05-18	Tricase Porto - Rio	39°55'10.5"N 18°23'39.5"E	2	17	Free diving - Visual collection technique & Substrate Sampling	Rocky	Pseudoceros velutinus
PL	3	2016-09-16	Tricase Area	39°55'46.5"N 18°24'19.8"E	-	-	Local Fish market	Parassite	Hexostoma thynni
PL	4	2016-09-21	Marina Serra - Matrona Cave	39°54'20.6"N 18°23'26.2"E	4	-	SCUBA diving - Photographic sampling	Cave	Prostheceraeus giesbrechtii
PL	5	2016-10-09	Tricase Porto - Punta Destra	39°55'34.2"N 18°23'46.2"E	15	23	SCUBA diving - Visual collection technique & Substrate Sampling	Rocky	Pseudoceros maximus-type A
PL	6	2017-03-22	Santa Cesarea Terme - Bortone's Cave	40°03'43.9"N 18°28'46.6"E	8	-	SCUBA diving - Photographic sampling	Cave	Thysanozoon brocchii		parassite of Torpedo marmorata
PL	7	2017-05-21	Marina Serra Area	39°54'25.4"N 18°23'57.5"E	16	-	SCUBA diving - Visual collection technique & Substrate Sampling	Rocky	Prostheceraeus giesbrechtii
PL	8	2017-07-09	Guardiola-Funnuvojere	39°52'45.8"N 18°24'00.1"E	8	-	SCUBA diving - Photographic sampling	Rocky	Planocera ceratommata
PR	1	2016-05-15	Tricase Area	39°55'46.5"N 18°24'19.8"E	30	-	Artisanal fishers - Set nylon trammel net	Coralligenous	Miniacina miniacea
PR	2	2016-06-22	Funnuvojere	39°53'11.1"N 18°23'56.3"E	70	-	Artisanal fishers - Set nylon trammel net	Coralligenous rubble	Folliculinidae ind		on Halimeda tuna (A23)
PR	3	2016-06-27	Tricase Porto - Avamposto	39°55'45.1"N 18°23'45.4"E	0-5	24	Free diving - Photographic sampling	Pelagic	Collozoum ind		10cm, juvanile
PR	4	2016-05-28	Tricase Area	39°55'46.5"N 18°24'19.8"E	-	-	Artisanal fishers - Set nylon trammel net	Epibiont	Textularia ind		on floating rope
PR	5	2016-05-28	Tricase Area	39°55'46.5"N 18°24'19.8"E	-	-	Artisanal fishers - Set nylon trammel net	Epibiont	N.C.		on deep coralligenous rock
PR	7	2017-08-12	Tricase Porto - La Conca	39°56'23.6"N 18°23'57.4"E	10	-	SCUBA diving - Visual collection technique & Substrate Sampling	Rocky	Zoothamnium niveum		Many specimens
SC	1	2016-04-13	Tricase Porto - Avamposto	39°55'45.1"N 18°23'45.4"E	0-2	14	Free diving - Visual collection technique & Substrate Sampling	Pelagic	Chrysaora hysoscella	Medusa stage occurrence (IV-V)
SC	2	2016-04-20	Tricase Porto - Punta Destra	39°55'34.2"N 18°23'46.2"E	0-5	15	Free diving - Visual collection technique & Substrate Sampling	Pelagic	Aurelia solida	Medusa stage occurrence (IV-V)
SC	3	2016-06-01	Tricase Area	39°55'46.5"N 18°24'19.8"E	70	-	Artisanal fishers	-	Nausithoe sp.
SC	4	2016-06-01	Tricase Area	39°55'46.5"N 18°24'19.8"E	2	-	Citizen science - Observation	Pelagic	Rhizostoma pulmo
SC	5	2017-07-29	Tricase Area	39°55'46.5"N 18°24'19.8"E	1	-	Free diving - Photographic sampling	Pelagic	Cotylorhiza tuberculata	Medusa stage occurrence (VII)	Feeding on Flabellia petiolata
SC	6	-	-	-	-	-	-	-	Nausithoe ind
T	1	2016-03-25	Tricase Porto - Rio	39°55'10.5"N 18°23'39.5"E	0-5	-	Free diving - Visual collection technique & Substrate Sampling	Pelagic	Salpa fusiformis
T	2	2016-04-15	Tricase Porto - Avamposto	39°55'45.1"N 18°23'45.4"E	0-3	16	Free diving - Visual collection technique & Substrate Sampling	Pelagic	Salpa maxima		Common in coastal ponds
T	3	2016-04-21	Tricase Porto - Rio	39°55'10.5"N 18°23'39.5"E	0-5	16	Free diving - Visual collection technique & Substrate Sampling	Pelagic	Salpa fusiformis		Eggs (VI-VII)
T	4	2016-04-26	Tricase Porto - Avamposto	39°55'45.1"N 18°23'45.4"E	0-5	15	Free diving - Visual collection technique & Substrate Sampling	Pelagic	Salpa maxima		feeding on Sertularella
T	5	2016-04-26	Tricase Porto - Avamposto	39°55'45.1"N 18°23'45.4"E	3	15	Free diving - Visual collection technique & Substrate Sampling	Pelagic	Helicosalpa virgula	Occurrence (IV)	On green algae (A33)
T	7	2016-05-15	Tricase Area	39°55'46.5"N 18°24'19.8"E	60	-	Artisanal fishers - Set nylon trammel net	-	Pyura tessellata
T	9	2016-05-15	Tricase Area	39°55'46.5"N 18°24'19.8"E	30	-	Artisanal fishers	Coralligenous rubble	Polycitor crystallinus		on Cidaris cidaris
T	10	2016-05-24	Marina Serra Area	39°54'25.4"N 18°23'57.5"E	20	-	Artisanal fishers - Set monofilament gillnet	-	Microcosmus ind
T	14	2016-06-30	Tricase Porto - Avamposto	39°55'45.1"N 18°23'45.4"E	1	24	Free diving - Visual collection technique & Substrate Sampling	Rocky	Diplosoma spongiforme
T	16	2016-07-06	Tricase Porto - Avamposto	39°55'45.1"N 18°23'45.4"E	11	24	Free diving - Photographic sampling	Rocky	Halocynthia papillosa
T	18	2016-07-29	Tricase Porto - New Marina	39°55'54.1"N 18°23'45.7"E	4	-	Free diving - Visual collection technique & Substrate Sampling	Rocky	Botrylloides niger
T	21	2016-09-21	Marina Serra - Matrona Cave	39°54'20.6"N 18°23'26.2"E	15	-	SCUBA diving - Photographic sampling	Cave	Pycnoclavella ind		Parassita di Antedon mediterranea
T	24	2017-04-30	Ciolo Cave	39°50'39.5"N 18°23'11.4"E	1	-	SCUBA diving - Visual collection technique & Substrate Sampling	Cave	Ascidia mentula
T	25	2017-05-20	Marina Serra Area	39°54'25.4"N 18°23'57.5"E	15	-	SCUBA diving - Photographic sampling	Rocky	Aplidium ind
V	3	2016-04-23	Andrano Area	39°58'10.1"N 18°24'50.4"E	-	-	Artisanal fishers - Set monofilament gillnet	Pelagic	Spicara smaris	Reproductive behaviour (IV)
V	4	2016-04-23	Andrano Area	39°58'10.1"N 18°24'50.4"E	-	-	Artisanal fishers - Set monofilament gillnet	Pelagic	Mullus surmuletus		on Aglaophenia octodonta (H22)
V	5	2016-04-23	Andrano Area	39°58'10.1"N 18°24'50.4"E	10	-	Artisanal fishers - Set monofilament gillnet	Pelagic	Boops boops		On Paramuricea clavata
V	6	2016-04-23	Andrano Area	39°58'10.1"N 18°24'50.4"E	40	-	Artisanal fishers - Set monofilament gillnet	Pelagic	Anthias anthias
V	7	2016-04-23	Andrano Area	39°58'10.1"N 18°24'50.4"E	-	-	Artisanal fishers - Set monofilament gillnet	Pelagic	Serranus hepatus
V	8	2016-04-23	Andrano Area	39°58'10.1"N 18°24'50.4"E	-	-	Artisanal fishers - Set monofilament gillnet	Pelagic	Chromis chromis
V	9	2016-04-23	Andrano Area	39°58'10.1"N 18°24'50.4"E	-	-	Artisanal fishers - Set monofilament gillnet	Pelagic	Coris julis
V	10	2016-04-23	Andrano Area	39°58'10.1"N 18°24'50.4"E	25	-	Artisanal fishers - Set monofilament gillnet	Pelagic	Symphodus mediterraneus
V	11	2016-04-23	Andrano Area	39°58'10.1"N 18°24'50.4"E	-	-	Artisanal fishers - Set monofilament gillnet	Pelagic	Pagellus erythrinus
V	12	2016-04-23	Andrano Area	39°58'10.1"N 18°24'50.4"E	25	-	Artisanal fishers - Set monofilament gillnet	Pelagic	Sardina pilchardus
V	13	2016-04-23	Andrano Area	39°58'10.1"N 18°24'50.4"E	20	-	Artisanal fishers - Set monofilament gillnet	Pelagic	Scorpaena notata
V	14	2016-04-24	Marina Serra Area	39°54'25.4"N 18°23'57.5"E	-	-	Artisanal fishers - Set nylon trammel net	-	Dactylopterus volitans
V	15	2016-04-29	Tricase Area	39°55'46.5"N 18°24'19.8"E	-	-	Artisanal fishers - Set monofilament gillnet	Pelagic	Chelidonichthys lastoviza
V	16	2016-05-09	Marina Serra - Porticciolo	39°54'38.2"N 18°23'36.7"E	10	16	Free diving - Visual collection technique & Substrate Sampling	Rocky	Muraena helena
V	17	2016-05-09	Marina Serra - Porticciolo	39°54'38.2"N 18°23'36.7"E	10	16	Free diving - Visual collection technique & Substrate Sampling	Rocky	Parablennius gattorugine
V	18	2016-05-09	Marina Serra - Porticciolo	39°54'38.2"N 18°23'36.7"E	10	16	Free diving - Visual collection technique & Substrate Sampling	Rocky	Serranus scriba
V	19	2016-05-09	Marina Serra - Porticciolo	39°54'38.2"N 18°23'36.7"E	10	16	Free diving - Visual collection technique & Substrate Sampling	Rocky	Serranus cabrilla
V	20	2016-05-09	Marina Serra - Porticciolo	39°54'38.2"N 18°23'36.7"E	5	16	Free diving - Visual collection technique & Substrate Sampling	Rocky	Thalassoma pavo		on Floating plastic
V	21	2016-05-09	Marina Serra - Porticciolo	39°54'38.2"N 18°23'36.7"E	3	16	Free diving - Visual collection technique & Substrate Sampling	Rocky	Gobius cobitis
V	22	2016-05-15	Tricase Area	39°55'46.5"N 18°24'19.8"E	60	-	Artisanal fishers - Set monofilament gillnet	Pelagic	Trachurus trachurus
V	23	2016-05-15	Tricase Area	39°55'46.5"N 18°24'19.8"E	60	-	Artisanal fishers - Set monofilament gillnet	Pelagic	Scomber scombrus
V	24	2016-05-15	Tricase Area	39°55'46.5"N 18°24'19.8"E	60	-	Artisanal fishers - Set monofilament gillnet	-	Mullus surmuletus
V	25	2016-05-15	Tricase Area	39°55'46.5"N 18°24'19.8"E	60	-	Artisanal fishers - Set monofilament gillnet	-	Mullus barbatus barbatus
V	27	2016-05-15	Tricase Area	39°55'46.5"N 18°24'19.8"E	67	-	Artisanal fishers - Set nylon trammel net	-	Zeus faber
V	28	2016-05-15	Tricase Area	39°55'46.5"N 18°24'19.8"E	67	-	Artisanal fishers - Set nylon trammel net	-	Raja miraletus
V	29	2016-05-15	Tricase Area	39°55'46.5"N 18°24'19.8"E	60	-	Artisanal fishers - Set nylon trammel net	-	Lophius ind
V	30	2016-05-15	Tricase Area	39°55'46.5"N 18°24'19.8"E	30	-	Artisanal fishers - Set nylon trammel net	Pelagic	Epinephelus costae		On algal turfs
V	31	2016-05-15	Tricase Area	39°55'46.5"N 18°24'19.8"E	30	-	Artisanal fishers - Set nylon trammel net	Pelagic	Phycis phycis
V	32	2016-05-15	Tricase Area	39°55'46.5"N 18°24'19.8"E	28-30	-	Artisanal fishers - Set nylon trammel net	-	Uranoscopus scaber
V	33	2016-05-15	Tricase Area	39°55'46.5"N 18°24'19.8"E	30	-	Artisanal fishers - Set nylon trammel net	Pelagic	Sarpa salpa		Deep water diving DISO
V	34	2016-05-19	Tricase Area	39°55'46.5"N 18°24'19.8"E	30	-	Artisanal fishers - Set monofilament gillnet	Pelagic	Sphyraena sphyraena
V	35	2016-05-22	Tricase Area	39°55'46.5"N 18°24'19.8"E	-	-	Artisanal fishers - Set monofilament gillnet	Pelagic	Chelon auratus
V	36	2016-05-22	Tricase Area	39°55'46.5"N 18°24'19.8"E	-	-	Artisanal fishers	Pelagic	Chelidonichthys lastoviza		on floating plastic feeding on Clytia
V	37	2016-05-24	Marina Serra Area	39°54'25.4"N 18°23'57.5"E	3	-	Artisanal fishers - Set monofilament gillnet	-	Symphodus tinca
V	38	2016-05-24	Marina Serra Area	39°54'25.4"N 18°23'57.5"E	16	-	Artisanal fishers - Set monofilament gillnet	-	Scorpaena porcus
V	39	2016-05-24	Marina Serra Area	39°54'25.4"N 18°23'57.5"E	-	-	Artisanal fishers - Set monofilament gillnet	Pelagic	Diplodus vulgaris
V	40	2016-05-24	Marina Serra Area	39°54'25.4"N 18°23'57.5"E	-	-	Artisanal fishers - Set monofilament gillnet	Pelagic	Oblada melanura
V	41	2016-05-24	Marina Serra Area	39°54'25.4"N 18°23'57.5"E	-	-	Artisanal fishers - Set monofilament gillnet	Pelagic	Diplodus puntazzo		with Sabella spallanzani epibiont
V	42	2016-05-24	Marina Serra Area	39°54'25.4"N 18°23'57.5"E	25	-	Artisanal fishers - Set monofilament gillnet	-	Scorpaena scrofa
V	43	2016-05-24	Marina Serra Area	39°54'25.4"N 18°23'57.5"E	20	-	Artisanal fishers - Set monofilament gillnet	Pelagic	Sarda sarda		on Pecten Jacobeus
V	44	2016-05-24	Marina Serra Area	39°54'25.4"N 18°23'57.5"E	25	-	Artisanal fishers - Set monofilament gillnet	-	Trachinus araneus
V	45	2016-05-25	Tricase Area	39°55'46.5"N 18°24'19.8"E	-	-	Artisanal fishers - Set nylon trammel net	Coralligenous	Bothus podas		On Poseidonia oceanica floating seeds
V	46	2016-05-25	Tricase Area	39°55'46.5"N 18°24'19.8"E	20	-	Artisanal fishers - Set nylon trammel net	Coralligenous	Microchirus ocellatus
V	47	2016-05-15	Tricase Area	39°55'46.5"N 18°24'19.8"E	-	-	Artisanal fishers - Set nylon trammel net	-	Raja miraletus	Eggs (V)
V	48	2016-05-25	Marina Serra Area	39°54'25.4"N 18°23'57.5"E	10	-	Artisanal fishers - Set monofilament gillnet	-	Synodus saurus
V	49	2016-05-25	Tricase Area	39°55'46.5"N 18°24'19.8"E	0	-	Artisanal fishers - Observation from the boat	Pelagic	Tursiops truncatus
V	50	2016-05-31	Tricase Area	39°55'46.5"N 18°24'19.8"E	-	-	Artisanal fishers - Set nylon trammel net	-	Dasyatis pastinaca
V	51	2016-05-31	Tricase Area	39°55'46.5"N 18°24'19.8"E	5	-	Artisanal fishers - Set nylon trammel net	Rocky	Torpedo marmorata
V	52	2016-05-31	Tricase Area	39°55'46.5"N 18°24'19.8"E	-	-	Artisanal fishers - Set nylon trammel net	Pelagic	Sardinella aurita
V	53	2016-05-31	Tricase Area	39°55'46.5"N 18°24'19.8"E	-	-	Artisanal fishers - Set nylon trammel net	Pelagic	Spicara maena
V	54	2016-05-31	Tricase Area	39°55'46.5"N 18°24'19.8"E	-	-	Artisanal fishers - Set nylon trammel net	Pelagic	Sparus aurata
V	58	2016-06-10	Tricase Porto - Avamposto	39°55'45.1"N 18°23'45.4"E	1	-	Free diving - Photographic sampling	Rocky	Tripterygion tripteronotum
V	59	2016-06-22	Funnuvojere	39°53'11.1"N 18°23'56.3"E	20	-	Artisanal fishers - Set nylon trammel net	Coralligenous rubble	Labrus merula
V	61	2016-06-26	Tricase Porto - Avamposto	39°55'45.1"N 18°23'45.4"E	1	22	Free diving - Photographic sampling	Rocky	Aidablennius sphynx
V	62	2016-06-26	Tricase Porto - Avamposto	39°55'45.1"N 18°23'45.4"E	1	22	Free diving - Photographic sampling	Rocky	Lipophrys trigloides
V	63	2016-06-27	Tricase Porto - Avamposto	39°55'45.1"N 18°23'45.4"E	3	24	Free diving - Photographic sampling	Rocky	Symphodus ocellatus
V	64	2016-06-27	Tricase Porto - Avamposto	39°55'45.1"N 18°23'45.4"E	3	24	Free diving - Photographic sampling	Rocky	Symphodus tinca
V	65	2016-06-26	Tricase Porto - Avamposto	39°55'45.1"N 18°23'45.4"E	3	24	Free diving - Photographic sampling	Rocky	Parablennius zvonimiri
V	66	2016-05-28	Tricase Porto - Avamposto	39°55'45.1"N 18°23'45.4"E	1	-	Free diving - Visual collection technique & Substrate Sampling	Rocky	Oblada melanura
V	67	2016-05-01	Tricase Porto - Avamposto	39°55'45.1"N 18°23'45.4"E	7	-	Free diving - Photographic sampling	Rocky	Diplodus sargus
V	69	2016-05-01	Marina Serra Area	39°54'25.4"N 18°23'57.5"E	20	-	Artisanal fishers - Set nylon trammel net	-	Raja brachyura
V	70	2016-05-01	Marina Serra Area	39°54'25.4"N 18°23'57.5"E	20	-	Artisanal fishers - Set nylon trammel net	Pelagic	Pagellus acarne
V	71	2016-05-01	Marina Serra Area	39°54'25.4"N 18°23'57.5"E	20	-	Artisanal fishers - Set nylon trammel net	-	Solea solea
V	72	2016-07-06	Tricase Porto - Avamposto	39°55'45.1"N 18°23'45.4"E	0-2	24	Free diving - Photographic sampling	Rocky	Tripterygion tripteronotum
V	73	2016-07-06	Tricase Porto - Avamposto	39°55'45.1"N 18°23'45.4"E	2	24	Free diving - Photographic sampling	Pelagic	Sparus aurata
V	74	2016-07-06	Tricase Porto - Avamposto	39°55'45.1"N 18°23'45.4"E	2	24	Free diving - Photographic sampling	Pelagic	Spondyliosoma cantharus
V	75	2016-08-03	Tricase Porto - Porto Vecchio	39°55'59.7"N 18°23'45.8"E	0-3	-	Recreational fishers - Rod and line	Pelagic	Pagrus pagrus
V	76	2016-08-03	Tricase Porto - Porto Vecchio	39°55'59.7"N 18°23'45.8"E	3	-	Recreational fishers - Rod and line	Pelagic	Spondyliosoma cantharus
V	77	2016-08-03	Tricase Porto - Porto Vecchio	39°55'59.7"N 18°23'45.8"E	-	-	Recreational fishers - Rod and line	Pelagic	Pagellus acarne
V	78	2016-08-03	Tricase Porto - Porto Vecchio	39°55'59.7"N 18°23'45.8"E	0-3	-	Recreational fishers - Rod and line	Rocky	Parablennius sanguinolentus
V	79	2016-08-06	Tricase Area	39°55'46.5"N 18°24'19.8"E	15	-	Artisanal fishers	Pelagic	Balistes capriscus		on Posidonia oceanica
V	80	2016-08-03	Tricase Porto - Porto Vecchio	39°55'59.7"N 18°23'45.8"E	0-3	-	Recreational fishers - Rod and line	Rocky	Parablennius sanguinolentus		Verme Piatto rosa nei pressi delle Clavelline di cui si nutre
V	83	2016-08-10	Tricase Porto - L'isola	39°56'49.9"N 18°24'06.8"E	2	26	SCUBA diving - Photographic sampling	Pelagic	Seriola dumerili		Small gastropoda
V	84	2016-08-11	Tricase Porto - L'isola	39°56'49.9"N 18°24'06.8"E	5	26	SCUBA diving - Photographic sampling	Pelagic	Apogon imberbis		found by Lucio e Giulio
V	85	2016-08-14	Tricase Porto - New Marina	39°55'54.1"N 18°23'45.7"E	1	-	Recreational fishers - Rod and line	Pelagic	Lichia amia		found by Lucio e Giulio
V	86	2016-08-16	Tricase Porto - Avamposto	39°55'45.1"N 18°23'45.4"E	1-5	-	Free diving - Photographic sampling	Pelagic	Engraulis encrasicolus		found by Lucio e Giulio
V	87	2016-08-16	Tricase Porto - Porto Vecchio	39°55'59.7"N 18°23'45.8"E	1	-	Free diving - Photographic sampling	Rocky	Parablennius sanguinolentus
V	88	2016-08-20	Tricase Porto - Breakwater	39°55'53.0"N 18°23'47.4"E	3	-	Free diving - Photographic sampling	Artificial breakwater	Sparisoma cretense		on Pecten jacobeus
V	89	2016-09-10	Tricase Area	39°55'46.5"N 18°24'19.8"E	1	-	Recreational fishers - Rod and line	Pelagic	Euthynnus alletteratus
V	90	2016-09-13	Tricase Area	39°55'46.5"N 18°24'19.8"E	-	-	Recreational fishers - Rod and line	Pelagic	Auxis rochei rochei
V	92	2016-09-18	Andrano - Grotta Verde	39°57'48.3"N 18°24'16.9"E	1	-	SCUBA diving - Photographic sampling	Pelagic	Belone belone
V	93	2016-09-17	Marina Serra - Acqua Viva	39°54'42.7"N 18°23'39.9"E	1	-	SCUBA diving - Photographic sampling	Pelagic	Chelon labrosus
V	94	2016-09-17	Marina Serra - Acqua Viva	39°54'42.7"N 18°23'39.9"E	7	-	SCUBA diving - Photographic sampling	Rocky	Gobius geniporus		Very rare only 1 colony found
V	95	2016-09-21	Marina Serra - Matrona Cave	39°54'20.6"N 18°23'26.2"E	4	-	SCUBA diving - Photographic sampling	Cave	Epinephelus marginatus
V	96	2016-09-21	Marina Serra - Matrona Cave	39°54'20.6"N 18°23'26.2"E	4	-	SCUBA diving - Photographic sampling	Cave	Bothus podas
V	97	2016-09-25	Tricase Porto - Avamposto	39°55'45.1"N 18°23'45.4"E	5	-	SCUBA diving - Photographic sampling	Pelagic	Symphodus rostratus
V	98	2016-09-28	Marina Serra Area	39°54'25.4"N 18°23'57.5"E	3	-	Free diving - Photographic sampling	Rocky	Trachinotus ovatus
V	99	2016-09-28	Tricase Porto - Avamposto	39°55'45.1"N 18°23'45.4"E	7	-	SCUBA diving - Photographic sampling	Pelagic	Serranus hepatus
V	100	2016-09-28	Tricase Porto - Avamposto	39°55'45.1"N 18°23'45.4"E	7	-	SCUBA diving - Photographic sampling	Pelagic	Spicara smaris
V	101	2016-09-29	Tricase Area	39°55'46.5"N 18°24'19.8"E	-	-	Local Fish market	Pelagic	Lithognathus mormyrus		found by Lucio e Giulio
V	102	2016-09-29	Tricase Area	39°55'46.5"N 18°24'19.8"E	-	-	Local Fish market	Pelagic	Dentex dentex
V	103	2016-09-29	Tricase Area	39°55'46.5"N 18°24'19.8"E	-	-	Local Fish market	-	Merluccius merluccius
V	104	2016-10-03	Tricase Porto - Punta Destra	39°55'34.2"N 18°23'46.2"E	18	-	SCUBA diving - Photographic sampling	Pelagic	Xyrichtys novacula
V	105	2016-09-30	Tricase Area	39°55'46.5"N 18°24'19.8"E	-	-	Artisanal fishers	-	Pomatomus saltatrix
V	106	2016-09-12	Tricase Area	39°55'46.5"N 18°24'19.8"E	18	-	Recreational fishers - Rod and line	Pelagic	Scomber colias
V	108	2016-09-18	Andrano - Grotta Verde	39°57'48.3"N 18°24'16.9"E	2	-	Free diving - Photographic sampling	Cave	Atherina boyeri
V	109	2017-04-30	Ciolo Cave	39°50'39.5"N 18°23'11.4"E	2-4	-	SCUBA diving - Photographic sampling	Cave	Conger conger
V	110	2017-05-29	Tricase Porto - Avamposto	39°55'45.1"N 18°23'45.4"E	2	-	Free diving - Photographic sampling	Rocky	Symphodus roissali
V	111	2017-06-05	Tricase Porto - Avamposto	39°55'45.1"N 18°23'45.4"E	2	-	Free diving - Photographic sampling	Rocky	Parablennius incognitus
V	112	2017-06-12	Funnuvojere	39°53'11.1"N 18°23'56.3"E	7	-	Free diving - Photographic sampling	Rocky	Lithognathus mormyrus
V	113	2017-06-25	Tricase Porto - Canalone	39°55'48.0"N 18°24'01.4"E	23	-	SCUBA diving - Photographic sampling	Coralligenous	Sciaena umbra		Common in caves
V	114	2017-08-07	Guardiola	39°52'08.4"N 18°23'45.6"E	10	-	SCUBA diving - Photographic sampling	Rocky	Parablennius rouxi
V	115	-	-	-	-	-	-	-	Atherina hepsetus
V	116	-	-	-	-	-	-	-	Coryphoblennius galerita
V	117	-	-	-	-	-	-	-	Gobius incognitus
V	118	-	-	-	-	-	-	-	Microlipophrys canevae
V	119	-	-	-	-	-	-	-	Pagellus bogaraveo		Epiphyte of Cystoseira amentacea; Reproductive structures (IV)
V	120	-	-	-	-	-	-	-	Scorpaena maderensis
V	121	-	-	-	-	-	-	-	Symphodus doderleini		Very rare, one specimen growing on a neolitic anchor
V	122	-	-	-	-	-	-	-	Caretta caretta

## Sheet: INFO
Supplementary materials for Micaroni et al. Project "Biodiversity MARE Tricase": a Species Inventory of the Coastal Area of Southeastern Salento (Ionian Sea, Italy). Diversity
Table S2. Complete list of marine specimens recorded and identified during the project Biodiversity MARE Tricase with relative metadata and notes
Legend to CODE
A	Macroalgae and Plants
AL	Annelida
AN	Anthozoa
B	Bryozoa
BC	Brachiopoda
C	Crustacea
CE	Cephalochordata
CT	Ctenophora
E	Echinodermata
H	Hydrozoa
HE	Hemichordata
I	Insecta
M	Mollusca
N	Nematoda
NM	Nemertea
P	Porifera
PL	Platyhelminthes
PR	Protist
SC	Scyphozoa
T	Tunicata
V	Vertebrata
Sites
"Area" means that the exact location of the sampling was not recorded
